# Supplementary material for: Accuracy of the neutrophil-to-lymphocyte ratio for the diagnosis of neonatal sepsis: a systematic review and meta-analysis
Source: PubMed Central journal article supplement — BMJ Open. 2022 Dec 14;12(12):e060391. doi: 10.1136/bmjopen-2021-060391 (PMC9756154; doi:10.1136/bmjopen-2021-060391), 2022-12-14
Supplement: bmjopen-2021-060391.draft_revisions.pdf [file bmjopen-2021-060391.draft_revisions.pdf]

# BMJ Open

BMJ Open is committed to open peer review. As part of this commitment we make the peer review history of every article we publish publicly available.

When an article is published we post the peer reviewers' comments and the authors' responses online. We also post the versions of the paper that were used during peer review. These are the versions that the peer review comments apply to.

The versions of the paper that follow are the versions that were submitted during the peer review process. They are not the versions of record or the final published versions. They should not be cited or distributed as the published version of this manuscript.

BMJ Open is an open access journal and the full, final, typeset and author-corrected version of record of the manuscript is available on our site with no access controls, subscription charges or pay-per-view fees (<http://bmjopen.bmj.com>).

If you have any questions on BMJ Open's open peer review process please email [info.bmjopen@bmj.com](mailto:info.bmjopen@bmj.com)

# BMJ Open

## The accuracy of the neutrophil to lymphocyte ratio for the diagnosis of neonatal sepsis: a systematic review and meta-analysis

|                               |                                                                                                                                                                                                                                                                                                                                                                                                                                                                                                                                               |
|-------------------------------|-----------------------------------------------------------------------------------------------------------------------------------------------------------------------------------------------------------------------------------------------------------------------------------------------------------------------------------------------------------------------------------------------------------------------------------------------------------------------------------------------------------------------------------------------|
| Journal:                      | <i>BMJ Open</i>                                                                                                                                                                                                                                                                                                                                                                                                                                                                                                                               |
| Manuscript ID                 | bmjopen-2021-060391                                                                                                                                                                                                                                                                                                                                                                                                                                                                                                                           |
| Article Type:                 | Original research                                                                                                                                                                                                                                                                                                                                                                                                                                                                                                                             |
| Date Submitted by the Author: | 30-Dec-2021                                                                                                                                                                                                                                                                                                                                                                                                                                                                                                                                   |
| Complete List of Authors:     | xin, yu; Harbin Medical University Cancer Hospital, Department of Critical Care Medicine<br>Shao, Yunshuang; Mudanjiang Medical University<br>Mu, Wenjing; Harbin Medical University Cancer Hospital, Department of Critical Care Medicine<br>Li, Hongxu; Harbin Medical University Cancer Hospital, Department of Critical Care Medicine<br>Zhou, Yuxin; Harbin Medical University Cancer Hospital, Department of Critical Care Medicine<br>Wang, Changsong; Harbin Medical University Cancer Hospital, Department of Critical Care Medicine |
| Keywords:                     | INFECTIOUS DISEASES, NEONATOLOGY, Diagnostic microbiology < INFECTIOUS DISEASES                                                                                                                                                                                                                                                                                                                                                                                                                                                               |
|                               |                                                                                                                                                                                                                                                                                                                                                                                                                                                                                                                                               |

SCHOLARONE™  
Manuscripts

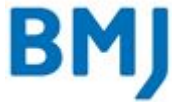

I, the Submitting Author has the right to grant and does grant on behalf of all authors of the Work (as defined in the below author licence), an exclusive licence and/or a non-exclusive licence for contributions from authors who are: i) UK Crown employees; ii) where BMJ has agreed a CC-BY licence shall apply, and/or iii) in accordance with the terms applicable for US Federal Government officers or employees acting as part of their official duties; on a worldwide, perpetual, irrevocable, royalty-free basis to BMJ Publishing Group Ltd ("BMJ") its licensees and where the relevant Journal is co-owned by BMJ to the co-owners of the Journal, to publish the Work in this journal and any other BMJ products and to exploit all rights, as set out in our [licence](#).

The Submitting Author accepts and understands that any supply made under these terms is made by BMJ to the Submitting Author unless you are acting as an employee on behalf of your employer or a postgraduate student of an affiliated institution which is paying any applicable article publishing charge ("APC") for Open Access articles. Where the Submitting Author wishes to make the Work available on an Open Access basis (and intends to pay the relevant APC), the terms of reuse of such Open Access shall be governed by a Creative Commons licence – details of these licences and which [Creative Commons](#) licence will apply to this Work are set out in our licence referred to above.

Other than as permitted in any relevant BMJ Author's Self Archiving Policies, I confirm this Work has not been accepted for publication elsewhere, is not being considered for publication elsewhere and does not duplicate material already published. I confirm all authors consent to publication of this Work and authorise the granting of this licence.

1 **The accuracy of the neutrophil to lymphocyte ratio for the diagnosis of neonatal**  
2 **sepsis: a systematic review and meta-analysis**

3 Yu Xin<sup>1</sup>, Yunshuang Shao<sup>2</sup>, Wenjing Mu<sup>1</sup>, Hongxu Li<sup>1</sup>, Yuxin Zhou<sup>1</sup>, Changsong  
4 Wang<sup>1\*</sup>

5 1.Department of Critical Care Medicine, Harbin Medical University Cancer Hospital,  
6 No. 150 Haping Rd, Nangang District, Harbin 150081, China.

7 2.Nursing Institute, Mudanjiang Medical University, No. 3Tongxiang Rd, Aimin  
8 District, Mudanjiang, 157000, China.

9 \*Corresponding author:

10 Changsong Wang, MD E-mail: changsongwangicu@163.com

11 Department of Critical Care Medicine, Harbin Medical University Cancer Hospital.

12 No. 150 Haping Rd, Nangang District, Harbin 150081, China.

13

14 Yu Xin, MS. E-mail: xy15774634247@163.com

15 Yunshuang Shao, MS. E-mail: 13644535692@163.com

16 Wenjing Mu, MS. E-mail: m297932712@163.com

17 Hongxu Li, MS. E-mail: lihongxuicu@163.com

18 Yuxin Zhou, MS. E-mail: zhouyuxin77work@163.com



1  
2  
3  
4 19 **Abstract**

5  
6  
7 20 **Objectives:** The purpose of this study was systematically and quantitatively to assess  
8  
9 21 the value of the neutrophil to lymphocyte ratio (NLR) for the diagnosis of neonatal  
10  
11  
12 22 sepsis by systematic review and meta-analysis.

13  
14  
15 23 **Design:** Systematic review and meta-analysis.

16  
17  
18 24 **Methods:** Eight major databases, including The Cochrane, PubMed, Embase, Web of  
19  
20  
21 25 Science, CNKI, Wanfang, China Biomedical Literature Database, and VIP Database,  
22  
23  
24 26 were systematically searched for neutrophil to lymphocyte ratio diagnoses of neonatal  
25  
26  
27 27 sepsis from inception to August 2021. Two investigators independently conducted the  
28  
29  
30 28 literature search, screening, data extraction, and quality evaluation with the  
31  
32  
33 29 QUADAS-2. Statistical analysis was performed using Review Manager 5.3, Stata 16.0,  
34  
35  
36 30 and Meta-DISC1.4.

37  
38  
39 31 **Results:** A total of 13 studies comprising 1365 newborns were involved in this meta-  
40  
41  
42 32 analysis. The pooled sensitivity of the ratio in the diagnosis of neonatal sepsis was  
43  
44  
45 33 0.77 (95 % confidence interval [CI] : 0.71-0.83), the pooled specificity was 0.86 (95  
46  
47  
48 34 % CI 0.70-0.94), the positive likelihood ratio was 5.6(95 % CI 2.3-13.8), the negative  
49  
50  
51 35 likelihood ratio was 0.26(95 % CI 0.19-0.37), the diagnostic odds ratio was 21(95 %  
52  
53  
54 36 CI 7-69), area under the curve (AUC) was 0.84(95 % CI 0.81-0.87). In the subgroup  
55  
56  
57 37 analysis of early-onset neonatal sepsis, the pooled sensitivity was 0.83 (95 % CI 0.68-  
58  
59  
60 38 0.91), the pooled specificity was 0.99 (95 % CI 0.78-1.00), the positive likelihood ratio  
39  
40  
41 39 was 91.3 (95 % CI 3.0-2823.6), the negative likelihood ratio was 0.18 (95 % CI 0.09-

1  
2  
3  
4 40 0.34), the diagnostic odds ratio was 519 (95 % CI 14-19952), and the area under the  
5  
6  
7 41 curve (AUC) was 0.95 (95 % CI 0.93-0.97). The Deeks funnel showed that there was  
8  
9 42 no statistically significant difference in the publication bias of the study ( $P>0.05$ ).

10  
11  
12 43 **Conclusions:** The neutrophil to lymphocyte ratio has a moderate diagnostic capacity  
13  
14  
15 44 with high sensitivity and specificity for diagnosing neonatal sepsis. It can provide a  
16  
17  
18 45 reference value for the early diagnosis of neonatal sepsis.

19  
20 46 **Keywords:** Sepsis, Newborn, Neutrophil to lymphocyte ratio, Meta-analysis  
21  
22

#### 23 24 25 26 48 **Strengths and limitations**

27  
28  
29 49 (1). As a cheap and readily available new comprehensive inflammatory indicator,  
30  
31  
32 50 Neutrophil to lymphocyte ratio (NLR) is relatively stable and unaffected by in vitro  
33  
34  
35 51 blood sample processing and conventional physiological conditions.

36  
37  
38  
39 53 (2). Neutrophil to lymphocyte ratio (NLR) is more accurate than blood culture (gold  
40  
41  
42 54 standard) in the diagnosis of neonatal sepsis. This new laboratory index improves the  
43  
44  
45 55 diagnostic efficiency of neonatal sepsis, providing clinical evidence for the diagnosis  
46  
47  
48 56 of neonatal sepsis.

49  
50  
51 57 (3). Due to the limited number of articles, we cannot accurately distinguish the  
52  
53  
54 58 accuracy of the ratio of neutrophils to lymphocytes in early-onset neonatal sepsis and  
55  
56  
57 59 late-onset sepsis

#### 58 59 60 60 **Background**

1  
2  
3  
4 61 Neonatal sepsis is a systemic inflammatory response syndrome caused by a bacterial  
5  
6  
7 62 infection in the neonatal stage. The clinical manifestations gradually surface in the  
8  
9  
10 63 whole body of the inflammatory response and finally progress into organ failure,  
11  
12 64 leading to death. [1] Studies have shown that the morbidity of neonatal sepsis is 1 %  
13  
14  
15 65 - 20 % in newborns and is also the third highest after premature delivery and neonatal  
16  
17 66 encephalopathy (perinatal asphyxia and trauma). [2] Due to the sensitivity of disease  
18  
19  
20 67 diagnosis methods and the timeliness and effectiveness of the whole treatment process,  
21  
22  
23 68 the mortality rate of neonatal sepsis is increasing year by year.  
24  
25  
26 69 According to a survey, the global mortality rate of neonatal sepsis reached 1.0 % to  
27  
28 70 5.0 %. [3] Early and precise identification of neonatal sepsis is crucial for slowing the  
29  
30  
31 71 progression of the disease and decreasing mortality. [4] Notwithstanding, there are  
32  
33  
34 72 many clinical biomarkers in the clinic for the diagnosis of neonatal sepsis, and due to  
35  
36  
37 73 the long time-consuming, low diagnostic performance, the rapid progress of the  
38  
39  
40 74 disease, missed identification of neonatal sepsis delays diagnosis and treatment,  
41  
42 75 increasing the risk of death. [5]  
43  
44  
45 76 The accurate identification of neonatal sepsis is critical to provide sufficient treatment  
46  
47  
48 77 time and improve clinical outcomes. In contrast, the neutrophil to lymphocyte ratio  
49  
50  
51 78 (NLR) is an independent predictor in the clinic that has been widely used in various  
52  
53  
54 79 diseases, such as immune system disease, tumors, and cancers. [6] Many studies have  
55  
56  
57 80 shown that the ratio of neutrophils to lymphocytes is more reliable for diagnosing  
58  
59  
60

1  
2  
3  
4 81 neonatal sepsis than neutrophil counts or lymphocyte counts alone. Nevertheless, there  
5  
6  
7 82 is still a dispute about diagnosing the effectiveness of neonatal sepsis. [7, 8]  
8

9  
10 83 We assessed the accuracy as a biomarker for diagnosing neonatal sepsis in newborns  
11  
12 84 by performing a systematic literature review and a meta-analysis, comparing the  
13  
14  
15 85 predictive value, and providing a reference for the clinical diagnosis of neonatal sepsis.  
16

17  
18 86

## 19 20 87 **Methods**

21  
22  
23 88 The present meta-analysis was conducted and reported according to the Preferred  
24  
25 89 Reporting Items for Systematic Reviews and Meta-analyses Statement (PRISMA).

26  
27 90 For details, see Additional file 1 and 2.

## 28 29 30 91 **Patient and Public Involvement**

31  
32 92 No patient involved

## 33 34 35 93 **Data source**

36  
37  
38 94 We searched the Cochrane, PubMed, Embase, Web of Science, CNKI, Wanfang,  
39  
40  
41 95 China Biomedical Literature Database, and VIP Database for studies on the diagnostic  
42  
43  
44 96 accuracy of neonatal sepsis published before August 2021. We used a combination of  
45  
46  
47 97 subject words and free words to search the study and the following keywords:  
48  
49 98 "Neutrophil and lymphocyte ratio," "Infant," "Newborn," "Neonate," "sepsis,"  
50  
51 99 "septicemia," "Neonatal Sepsis. "In addition, we checked the reference lists of each  
52  
53  
54 100 of the primary studies to identify additional publications. The retrieval format is shown  
55  
56  
57 101 in Additional file 3.  
58  
59  
60

## 102 **Study eligibility**

103 Inclusion criteria: (1). The purpose of the study was to evaluate or explore the  
104 diagnostic value of the neutrophil to lymphocyte ratio in neonatal sepsis. The case  
105 group included newborns with confirmed neonatal sepsis, and the control group  
106 included newborns with nonneonatal sepsis. The diagnostic gold standard is blood  
107 culture (4). It can directly or indirectly obtain the true positive, false positive, true  
108 negative, and false negative values of the neutrophil-lymphocyte ratio in the diagnosis  
109 of neonatal sepsis. The language is English or Chinese.

110 Exclusion criteria: (1). Unable to extracted from the full text (2). Reviews, conference  
111 reports, individual cases, and animal experiments; (3). A duplicated study.

## 112 **Data extraction and Quality Assessment**

113 Two authors independently extracted data from the included literature, including the  
114 year of publication, country of origin, study design, author, publication year, newborn  
115 birth situation, study location, sample size, case and control numbers, cutoff value,  
116 true positive value, false-positive value, false-negative value, true negative value,  
117 sensitivity, and specificity. Assess the quality of the Diagnostic Accuracy Studies-2  
118 (QUADAS-2) checklist.

## 119 **Statistical analyses**

120 The  $I^2$  test evaluated study heterogeneity.  $I^2 > 50\%$  indicated that the heterogeneity  
121 generated in the study would have a specific impact. Meta Disc1.4 software was used  
122 to analyze the threshold effect heterogeneity. If the effect sizes of the studies were

1  
2  
3  
4 123 homogeneous, a fixed-effects model was used; if they were heterogeneous, a random-  
5  
6  
7 124 effects model was used. If there was heterogeneity between the studies, the source of  
8  
9  
10 125 the heterogeneity was further explored, and threshold effect and nonthreshold effect  
11  
12 126 analyses were carried out. The combined sensitivity, combined specificity, combined  
13  
14  
15 127 diagnostic odds ratio (DOR), combined positive likelihood ratio (PLR), combined  
16  
17  
18 128 negative likelihood ratio, and its 95 % confidence interval (95 % CI) were determined  
19  
20 129 using Stata 16.0. Simultaneously, a combined receiver operating characteristic curve  
21  
22  
23 130 (SROC) fitting analysis was performed. At the same time, the Deeks test was used to  
24  
25  
26 131 evaluate the publication bias of the included literature. If  $P < 0.05$ , it was considered  
27  
28  
29 132 that the included literature had publication bias.

## 31 133 **Results**

### 34 134 **Identification of studies**

35  
36 135 After checking duplicates and reading abstracts and excluding relevant literature  
37  
38  
39 136 according to the exclusion criteria, 13 studies were finally included. The specific  
40  
41  
42 137 process is shown in (Fig 1). The references were included from 2017 to 2021, with  
43  
44  
45 138 1365 newborns, including 726 in the study group and 639 in the control group. Among  
46  
47  
48 139 them, 3 had late-onset sepsis, 5 had early-onset sepsis, and 2 were preterm infants.  
49  
50 140 Ten studies were from Asia, and three studies were from non-Asia. Basic information  
51  
52  
53 141 of the included literature is shown in Table 1.

### 56 142 **Quality of studies**

1  
2  
3  
4 143 We imported the literature into Review Manager 5.2 and used the QUADAS-2 tool to  
5  
6  
7 144 evaluate the quality of the 13 included references. According to the methodological  
8  
9  
10 145 evaluation results, the gold standard for the diagnosis of all patients is blood culture.  
11  
12 146 For patient selection, three references were considered high-risk. Since most studies  
13  
14  
15 147 do not specify a threshold in advance, there may be a risk of bias. Most articles did  
16  
17  
18 148 not mention whether the interpretation of the experimental results to be evaluated was  
19  
20  
21 149 performed without knowing the results of the gold standard, indicating that it is not  
22  
23 150 clear whether the interpretation of the results will produce a risk of bias. (Fig 2, 3).

### 151 **Heterogeneity exploration**

152 Since the heterogeneity of diagnostic meta-analysis is widespread, it is mainly  
153 composed of threshold effect heterogeneity and nonthreshold effect heterogeneity.  
154 Through the combination of data, we found that the sensitivity and specificity of  $I^2$   
155 were 68.61 % and 90.87 %, respectively. This indicates that there is considerable  
156 heterogeneity. We first conducted a threshold effect test. By using metadisc14.0, we  
157 found that the Spearman correlation coefficient was -0.093 ( $p= 0.762$ ) ( $p>0.05$ ).  
158 Furthermore, the proportion of heterogeneity is likely due to threshold effect = 0.23 in  
159 stata16.0. It shows no threshold effect heterogeneity, so to further find the source of  
160 heterogeneity, we carried out meta-regression and sensitivity analysis. The meta-  
161 regression results show that articles in non-Asian regions are the main source of  
162 heterogeneity (Table 2). Sensitivity analysis removes non-Asian, preterm, and late-

1  
2  
3  
4 163 onset sepsis research literature results and shows that the region is the main source of  
5  
6  
7 164 heterogeneity. (Table 3)

8  
9  
10 165 **Data synthesis and Subgroup analysis**

11  
12 166 (1). The pooled sensitivity and specificity of the neutrophil to lymphocyte ratio in the  
13  
14  
15 167 diagnosis of neonates were 0.77 (95 % CI 0.71-0.83) and 0.86 (95 % CI 0.70-0.94),  
16  
17  
18 168 respectively; PLR was 5.6 (95 % CI 2.3-13.8), NLR was 0.26 (95 % CI 0.19-0.37),  
19  
20  
21 169 DOR was 21 (95 % CI 7-69), and area under the curve (AUC) was 0.84 (95 % CI 0.81-  
22  
23 170 0.87) (Figs 4, 5, 6, 7).

24  
25  
26 171 (2). The results of the EOS subgroup analysis showed that the pooled sensitivity and  
27  
28  
29 172 specificity of the neutrophil to lymphocyte ratio in the diagnosis of neonatal sepsis  
30  
31  
32 173 were 0.83 (95 % CI 0.68-0.91) and 0.99 (95 % CI 0.78-1.00); PLR was 91.3 (95 % CI  
33  
34 174 3.0-2823.6), NLR was 0.18 (95 % CI 0.09-0.34), DOR was 519 (95 % CI 14-19952),  
35  
36  
37 175 and the area under the curve (AUC) was 0.95 (95 % CI 0.93-0.97).

38  
39  
40 176 (3). Cutoff value >2, pooled sensitivity and specificity are, respectively 0.83(95 % CI  
41  
42  
43 177 0.66-0.93) and 0.80(95 % CI 0.44-0.95), respectively; PLR is 4.1(95 % CI 1.0-17.2),  
44  
45  
46 178 NLR is 0.21(95 % CI 0.07-0.60), DOR is 20 (95 % CI 2-218), the area under the curve  
47  
48  
49 179 (AUC) is 0.88 (95 % CI 0.85-0.91).

50  
51  
52 180 (4). Cutoff value <2, pooled sensitivity and specificity are, respectively 0.74(95 % CI  
53  
54  
55 181 0.69-0.78) and 0.90(95 % CI 0.71-0.97); PLR is 7.1(95 % CI 2.3-21.8), NLR is  
56  
57  
58 182 0.29(95 % CI 0.23-0.36), DOR is 25(95 % CI 7-88) The area under the curve (AUC)  
59  
60 183 is 0.77(95 % CI 0.73-0.81).



#### 184 **Publication bias exploration**

185 The results of Deeks's funnel plot asymmetry test showed that  $p=0.40$  and  $p>0.05$ .

186 This result indicated that the 13 articles included had no publication bias. (Fig 8)

#### 187 **Discussion**

188 The early identification of neonatal sepsis remains challenging in the clinic, and the  
189 neutrophil to lymphocyte ratio (NLR) is broadly used in diagnosing immune system  
190 diseases, tumors, and cancers. However, the accurate diagnosis of neonatal sepsis is  
191 still questionable. [22,23,24] We used a systematic review and meta-analysis to  
192 investigate the accuracy of the neutrophil to lymphocyte ratio (NLR) for the diagnosis  
193 of neonatal sepsis. The meta-analysis included all 13 studies from 7 nations, including  
194 1365 patients with neonatal sepsis. Moreover, the results revealed that the combined  
195 AUC of the neutrophil to lymphocyte ratio (NLR) in the diagnosis of neonatal sepsis  
196 was 0.84 (95 % CI=0.81, 0.87), showing that the neutrophil to lymphocyte ratio (NLR)  
197 has a moderate diagnostic value for neonatal sepsis, so the neutrophil to lymphocyte  
198 ratio (NLR) can be used as an independent predictor of neonatal sepsis.

199 Subgroup analysis indicated that pooled sensitivity and specificity were higher for  
200 detecting the ratio of neutrophils to lymphocytes (NLR) in a group of early-onset  
201 neonatal sepsis. The results are expressed stability of the results. Neonatal early-onset  
202 sepsis mainly emphasizes that the bacteria originate from intrauterine tissue and  
203 during delivery, and the spectrum of pathogenic bacteria is relatively concentrated.  
204 [25,26] Streptococcus B and Escherichia coli are the most common pathogens of

1  
2  
3  
4 205 early-onset neonatal sepsis. In the future, more research can be incorporated to further  
5  
6  
7 206 verify the accuracy of the neutrophil to lymphocyte ratio (NLR) diagnosis of early-  
8  
9  
10 207 onset sepsis.

11  
12 208 Our study included homogeneous research as much as possible, but the included  
13  
14  
15 209 studies still had heterogeneity, in which nonthreshold effects can be explained to  
16  
17  
18 210 partial heterogeneity; non-Asian areas were the primary source of heterogeneity  
19  
20  
21 211 (Table 2). Sensitive analysis results also indicate that the non-Asian region is the  
22  
23  
24 212 primary source of heterogeneity (Table 3). However, after removing all non-Asian  
25  
26  
27 213 articles, heterogeneity still existed, indicating this study's heterogeneity for other  
28  
29  
30 214 reasons.

31  
32 215 In addition, several limitations of this study should be put forward. (1). Although it is  
33  
34  
35 216 homogeneous to reduce the choice of bias applications, heterogeneity is still in the  
36  
37  
38 217 inclusive research. (2). The diagnosis of newborns will also have differences due to  
39  
40  
41 218 different researchers, resulting in false positive and false negative results for the  
42  
43  
44 219 diagnosis of neonatal sepsis, which leads to bias. (3). A part of the included research  
45  
46  
47 220 is a retrospective study, so there may be a selection of research objects. (4). The  
48  
49  
50 221 included research comes from different countries, and newborns have different  
51  
52  
53 222 immunity in newborns of different races and genders. Therefore, it is necessary to  
54  
55  
56 223 carry out the same race, large sample, multicenter prospective clinical study, and the  
57  
58  
59 224 value of the neutrophil to lymphocyte ratio (NLR) in diagnosing neonatal sepsis in the  
60  
225 future.

226

**227 Conclusion**

228 In summary, the neutrophil to lymphocyte ratio (NLR) has a moderate value in the  
229 diagnosis of neonatal sepsis and can be used to diagnose routine examination of  
230 neonatal sepsis. However, it is limited to the research site and research type. Further  
231 research is needed to carry out multicenter prospective studies with multiple samples  
232 to verify the accuracy of neutrophil to lymphocyte ratio (NLR) diagnosis and improve  
233 neonatal sepsis prognosis.

234

**235 Abbreviations**

236 QUADAS-2: Quality Assessment of Diagnostic Accuracy Studies-2; CI: confidence  
237 interval; SEN: sensitivity; SPE: specificity; NLR: negative likelihood ratio; PLR:  
238 positive likelihood ratio; DOR: diagnostic odds ratio; SEN: sensitivity; SPE:  
239 specificity; TP: true positive; FP: false positive; TN: true negative; FN: false negative;  
240 EOS: early-onset sepsis; LOS: late-onset sepsis; AUC: area under the curve; SROC:  
241 summary receiver operating characteristic.

**242 Contributors**

243 XY wrote the manuscript. LHX, ZYX, and MWJ performed the literature review. XY  
244 and SYS performed the statistical analysis. MWJ and WCS revised the text. All  
245 authors read and approved the final manuscript.

**246 Author Details**

1  
2  
3  
4 247 1. Department of Critical Care Medicine, Harbin Medical University Cancer Hospital,  
5  
6  
7 248 No. 150 Haping Rd., Nangang District, Harbin 150081, China.

8  
9 249 2. Nursing Institute, Mudanjiang Medical University, No. 3 Tongxiang Rd, Aimin  
10  
11  
12 250 District, Mudanjiang, 157000, China.

13  
14  
15 251 **Acknowledgments:** Not applicable.

16  
17 252 **Competing interests:** The authors declare that they have no competing interests.

18  
19  
20 253 **Availability of data and materials:** All data supporting the conclusions presented in  
21  
22  
23 254 this article are included in this published article.

24  
25 255 **Consent for publication:** Not applicable.

26  
27 256 **Ethics approval and consent to participate:** Not applicable.

28  
29  
30 257 **Funding:** None.

31  
32  
33 258

34  
35  
36 259 **Reference**

37  
38  
39 260 [1] Du Lizhong. Challenges in diagnosis and prevention of neonatal sepsis, *Chin J*  
40  
41  
42 261 *Pediatr*, 2019 ; 57(04): p. 241-243.

43  
44  
45 262 [2] Global, regional, and national life expectancy, all-cause mortality, and cause-  
46  
47  
48 263 specific mortality for 249 causes of death, 1980-2015: a systematic analysis for the  
49  
50 264 Global Burden of Disease Study 2015. *Lancet*, 2016. 388(10053): p. 1459-1544.

51  
52  
53 265 [3] Oza, S. Neonatal cause-of-death estimates for the early and late neonatal periods  
54  
55  
56 266 for 194 countries: 2000-2013. *Bull World Health Organ*, 2015. 93(1): p. 19-28.

- 1  
2  
3  
4 267 [4] Brodska, H. Diagnostic and prognostic value of presepsin vs. established  
5  
6  
7 268 biomarkers in critically ill patients with sepsis or systemic inflammatory response  
8  
9  
10 269 syndrome. *Clinical Chemistry and Laboratory Medicine (CCLM)*, 2018. 56(4): p. 658-  
11  
12 270 668.
- 13  
14  
15 271 [5] Li wei. Expert consensus on the diagnosis and management of neonatal sepsis  
16  
17 272 (version 2019), *Chin J Pediatr*, 2019. 57(4): p. 252-257.
- 18  
19  
20 273 [6] Gong W, Yang S, Yang X, et al. Blood preoperative neutrophil-to-lymphocyte ratio  
21  
22 274 is correlated with TNM stage in patients with papillary thyroid cancer[J]. *Clinics*, 2016,  
23  
24 275 71(6): 311-314.
- 25  
26  
27 276 [7] Kumarasamy C, Sabarimurugan S, Madurantakam R M, et al. Prognostic  
28  
29 277 significance of blood inflammatory biomarkers NLR, PLR, and LMR in cancer—A  
30  
31 278 protocol for systematic review and meta-analysis[J]. *Medicine*, 2019, 98(24): e14834.
- 32  
33  
34 279 [8] Mariaelena C, Diana G, Domenico M, et al. Baseline neutrophil-to-lymphocyte  
35  
36 280 ratio (NLR) and derived NLR could predict overall survival in patients with advanced  
37  
38 281 melanoma treated with nivolumab[J]. *Journal for Immunotherapy of Cancer*, 2018,  
39  
40 282 6(1): 74.
- 41  
42  
43 283 [9] Ruslie R H, Tjipta D G, Samosir C T, et al. Bacterial pattern, and role of laboratory  
44  
45 284 parameters as marker for neonatal sepsis[C]//IOP Conference Series: Earth and  
46  
47 285 Environmental Science. *IOP Publishing*, 2018, 125(1): 012057.
- 48  
49  
50  
51  
52  
53  
54  
55  
56  
57  
58  
59  
60

- 1  
2  
3  
4 286 [10] Sumitro K R, Utomo M T, Widodo A D W. Neutrophil-to-Lymphocyte Ratio as  
5  
6  
7 287 an Alternative Marker of Neonatal Sepsis in Developing Countries[J]. *Oman Medical*  
8  
9  
10 288 *Journal*, 2021, 36(1): e214-e214.
- 11  
12 289 [11] Goldberg O, Amitai N, Chodick G, et al. Can we improve early identification of  
13  
14  
15 290 neonatal late-onset sepsis? A validated prediction model[J]. *Journal of Perinatology*,  
16  
17  
18 291 2020, 40(9): p. 1315-1322.
- 19  
20 292 [12] Wilar R. Diagnostic value of eosinopenia and neutrophil to lymphocyte ratio on  
21  
22  
23 293 early onset neonatal sepsis[J]. *Korean Journal of Pediatrics*, 2018, 62(6): p. 217-223.
- 24  
25  
26 294 [13] Karabulut B, Alatas S O. Diagnostic Value of Neutrophil to Lymphocyte Ratio  
27  
28  
29 295 and Mean Platelet Volume on Early Onset Neonatal Sepsis on Term Neonate[J].  
30  
31 296 *Journal of Pediatric Intensive Care*, 2021, 10(02): 143-147.
- 32  
33  
34 297 [14] Du xiaoyu,Ai liang. Changes and clinical significance of NLR, CRP and PCT in  
35  
36  
37 298 neonates with sepsis. *Experimental and Laboratory Medicine*,2019.37(01): p.110-112.
- 38  
39  
40 299 [15] Zhang, S.J.Platelet-to-Lymphocyte and Neutrophil-to-Lymphocyte Ratio as  
41  
42  
43 300 Predictive Biomarkers for Early-onset Neonatal Sepsis. *Jcsp-Journal of the College*  
44  
45 301 *of Physicians and Surgeons Pakistan*, 2021. 31(7): p. 821-824.
- 46  
47  
48 302 [16] Panda S K, Nayak M K, Rath S, et al. The Utility of the Neutrophil-Lymphocyte  
49  
50  
51 303 Ratio as an Early Diagnostic Marker in Neonatal Sepsis[J]. *Cureus*, 2021, 13(1):  
52  
53 304 e12891.
- 54  
55  
56  
57  
58  
59  
60

- 1  
2  
3  
4 305 [17] E.C, H.S,C.C,et al.The Value of Neutrophil to Lymphocyte Ratio and Platelet to  
5  
6  
7 306 Lymphocyte Ratio for Detecting Early-onset Neonatal Sepsis. *Journal of pediatric*  
8  
9  
10 307 *hematology/oncology*, 2018. 40(4) E229-E232.
- 11  
12 308 [18] Mahmoud N M S A, Baheeg G, Abdelhakeem M, et al.Platelet to Lymphocyte  
13  
14  
15 309 Ratio and Neutrophil to Lymphocyte Ratio as New Diagnostic Markers for Detection  
16  
17  
18 310 of Early-onset Neonatal Sepsis in Full-term Newborns. 2019.
- 19  
20 311 [19] Mira S M, Alkhalegy H A, Abd-Elraheem S I, et al. Neutrophil and Platelet to  
21  
22  
23 312 Lymphocyte Ratio for Detecting Early-onset Neonatal Sepsis[J]. *International*  
24  
25  
26 313 *Journal of Medical Arts*, 2021, 3(2): 1274-1281.
- 27  
28 314 [20] Varal I,Dogan P. Can neutrophil-lymphocyte ratio be a predictor of late-onset  
29  
30  
31 315 sepsis in preterm infants? [J]. *Annals of Medical Research*, 2020, 27(1):23.
- 32  
33  
34 316 [21] Lim, H.Sukmawati.M, Artana.W. D,et al.Validity of neutrophil lymphocyte count  
35  
36  
37 317 ratio in neonatal sepsis. *International Journal of Health Sciences*, (2021).5(2), 53-61.
- 38  
39 318 [22] Bakhuizen, S.E.Meta -analysis shows that infants who have suffered neonatal  
40  
41  
42 319 sepsis face an increased risk of mortality and severe complications. *Acta Paediatrica*,  
43  
44  
45 320 2014. 103(12): p. 1211-1218.
- 46  
47 321 [23] Shabuj K H, Hossain J, Moni S C, et al.C-reactive protein (CRP) as a single  
48  
49  
50 322 biomarker for diagnosis of neonatal sepsis: a comprehensive meta-analysis.  
51  
52  
53 323 *Mymensingh Med J*, 2017. 26(2): p. 364-371.
- 54  
55 324 [24] Rich é, F. Reversal of neutrophil-to-lymphocyte count ratio in early versus late  
56  
57  
58 325 death from septic shock. *Critical Care*, 2015. 19(1): p. 1-10.  
59  
60

1  
2  
3  
4 326 [25] Stoll B J, Hansen N I, Higgins R D, et al. Very low birth weight preterm infants  
5  
6  
7 327 with early onset neonatal sepsis: the predominance of gram-negative infections  
8  
9  
10 328 continues in the National Institute of Child Health and Human Development Neonatal  
11  
12 329 Research Network, 2002–2003. *The Pediatric infectious disease journal*, 2005. 24(7):  
13  
14  
15 330 p. 635-639.

16  
17 331 [26] McIntire.D,D,K.J. Leveno. Neonatal mortality and morbidity rates in late preterm  
18  
19  
20 332 births compared with births at term. *Obstetrics & Gynecology*, 2008. 111(1): p. 35-41.  
21  
22

23 333

24 334

25 335

26  
27  
28  
29  
30  
31 336 **Figure legends:**

32  
33  
34 337 Figure 1: Flowchart of study selection, inclusion, and exclusion for the meta-analysis

35  
36 338 Figure 2: Risk of bias and applicability concerns summary

37  
38 339 Figure 3: Risk of bias and applicability concerns graph

39  
40 340 Figure 4: Forest plot of the pooled sensitivity and specificity

41  
42 341 Figure 5: Forest plot of the pooled diagnostic odds ratio

43  
44 342 Figure 6: Forest plot of the pooled positive LR and negative LR

45  
46 343 Figure 7: SROC of the neutrophil to lymphocyte ratio for the diagnosis of sepsis

47  
48 344 Figure 8: Funnel plot of studies included in the meta-analysis

49  
50  
51  
52 345

53  
54  
55  
56  
57  
58 346 **Additional file legends:**



1  
2  
3  
4  
5  
6  
7  
8  
9  
10  
11  
12  
13  
14  
15  
16  
17  
18  
19  
20  
21  
22  
23  
24  
25  
26  
27  
28  
29  
30  
31  
32  
33  
34  
35  
36  
37  
38  
39  
40  
41  
42  
43  
44  
45  
46  
47  
48  
49  
50  
51  
52  
53  
54  
55  
56  
57  
58  
59  
60

- 347 Additional file 1:Screenshot of search strategy
- 348 Additional file 2:Table 1 , Characteristics of the included 13 studies
- 349 Additional file 3:Table 2 , The result of meta-regression
- 350 Additional file 4:Table 3 , The results of sensitivity analysis

For peer review only

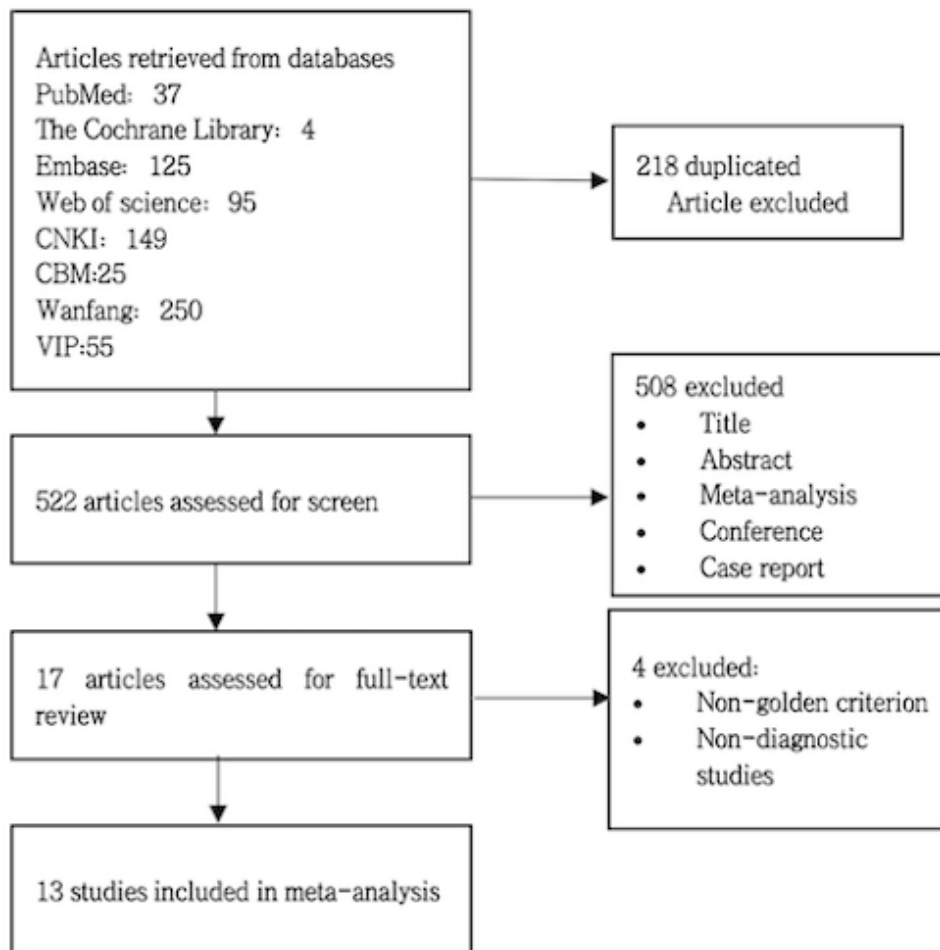

Figure 1: Flowchart of study selection, inclusion, and exclusion for the meta-analysis

89x91mm (144 x 144 DPI)

|                            | Risk of Bias      |            |                    |                 | Applicability Concerns |            |                    |
|----------------------------|-------------------|------------|--------------------|-----------------|------------------------|------------|--------------------|
|                            | Patient Selection | Index Test | Reference Standard | Flow and Timing | Patient Selection      | Index Test | Reference Standard |
| Emrah Can, MD2017          | +                 | +          | ?                  | +               | +                      | +          | +                  |
| Heriyanto Lim2021          | +                 | ●          | ?                  | +               | +                      | +          | +                  |
| Ipek Guney Varal2020       | +                 | ●          | +                  | +               | +                      | +          | +                  |
| Khadijah Rizky Sumitro2021 | ●                 | ●          | ?                  | +               | +                      | +          | +                  |
| Nagwa Mohamed,SAM2020      | +                 | ●          | +                  | +               | +                      | +          | +                  |
| Ori Goldberg2020           | +                 | ●          | ?                  | +               | +                      | +          | +                  |
| R H Ruslie2018             | ●                 | ●          | ?                  | +               | +                      | +          | +                  |
| Rocky Wilar, MD2018        | +                 | ●          | ?                  | +               | +                      | +          | +                  |
| Santosh K. Panda2021       | +                 | +          | ?                  | +               | +                      | +          | +                  |
| Sara Mohamed Mira2021      | +                 | ●          | ?                  | +               | +                      | +          | +                  |
| Senem Alkan Ozdemir2017    | ●                 | ●          | ?                  | +               | +                      | +          | +                  |
| Shujian Zhang 2021         | +                 | ●          | ?                  | +               | +                      | +          | ?                  |
| Xiaoyu Du2019              | +                 | ●          | ?                  | ●               | +                      | ?          | ?                  |

● High      ? Unclear      + Low

Figure 2: Risk of bias and applicability concerns summary

69x89mm (144 x 144 DPI)

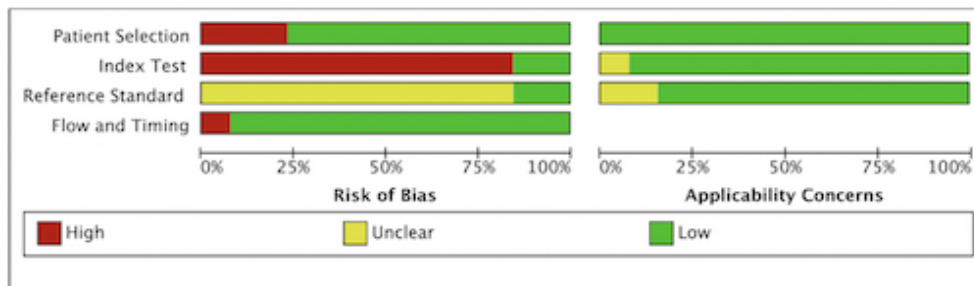

Figure 3: Risk of bias and applicability concerns graph

89x27mm (144 x 144 DPI)

1  
2  
3  
4  
5  
6  
7  
8  
9  
10  
11  
12  
13  
14  
15  
16  
17  
18  
19  
20  
21  
22  
23  
24  
25  
26  
27  
28  
29  
30  
31  
32  
33  
34  
35  
36  
37  
38  
39  
40  
41  
42  
43  
44  
45  
46  
47  
48  
49  
50  
51  
52  
53  
54  
55  
56  
57  
58  
59  
60

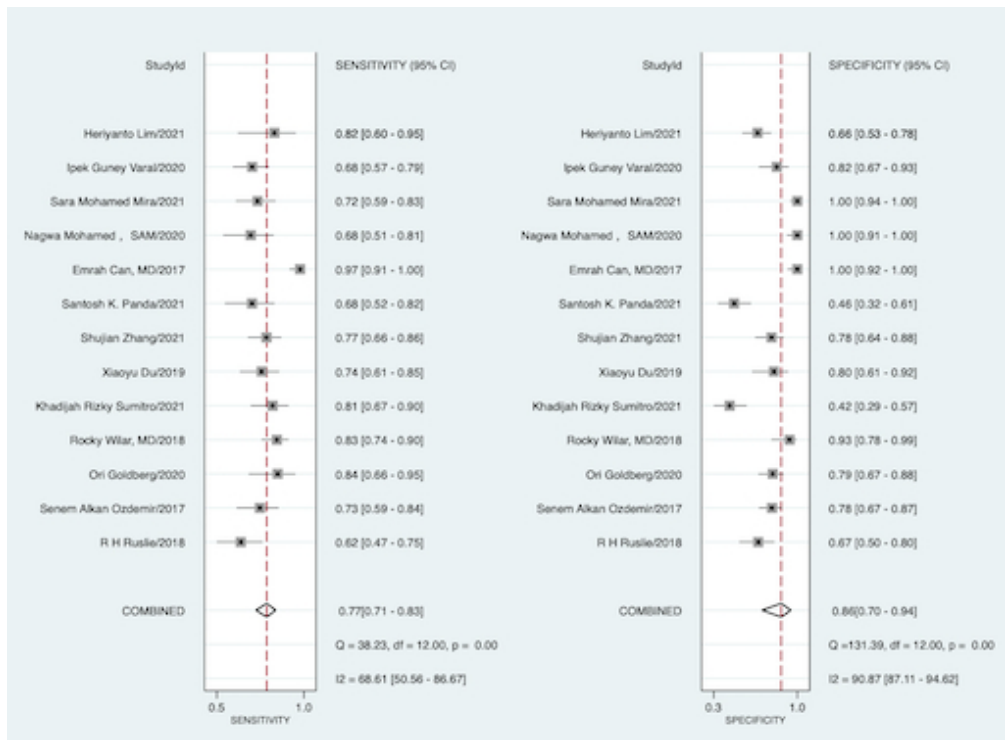

Figure 4: Forest plot of the pooled sensitivity and specificity

89x65mm (144 x 144 DPI)

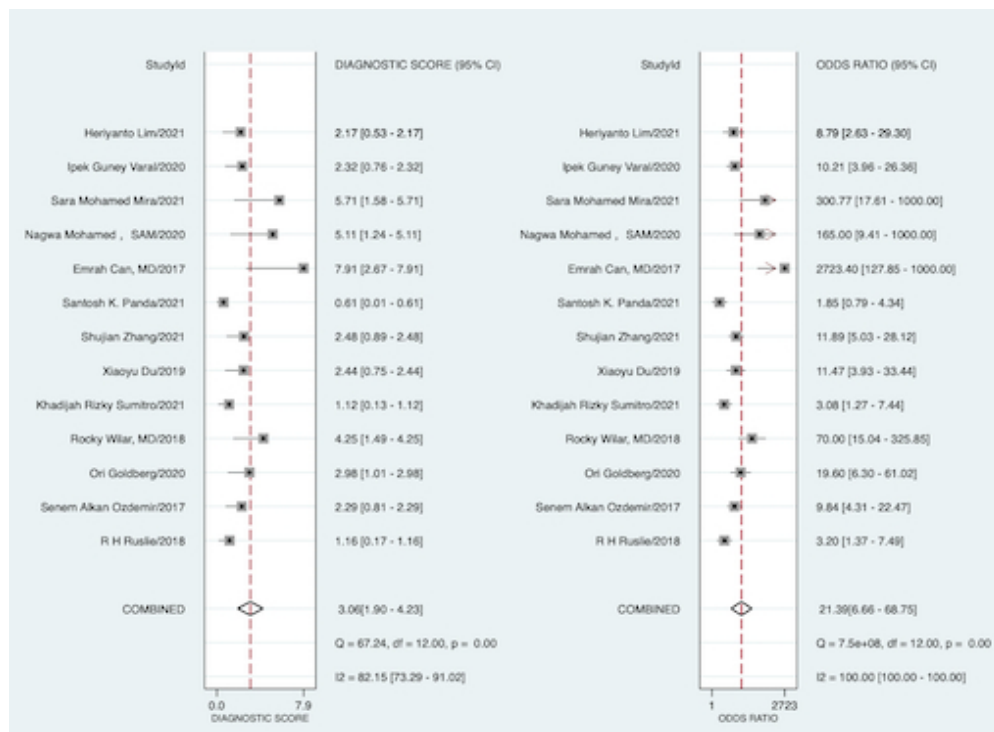

Figure 5: Forest plot of the pooled diagnostic odds ratio

89x65mm (144 x 144 DPI)

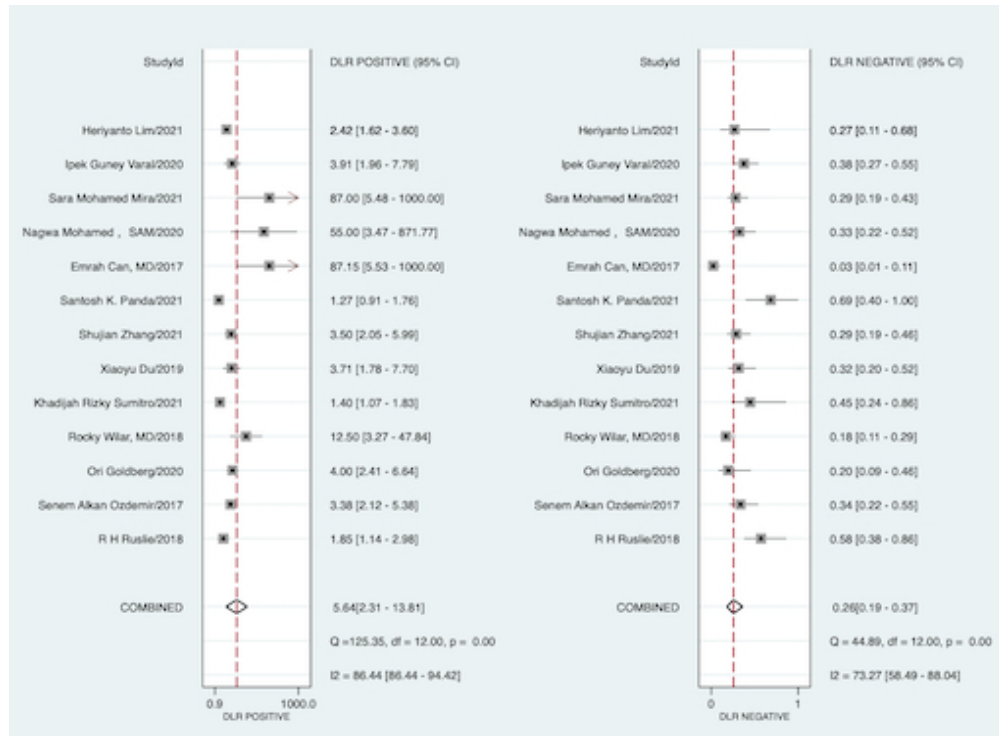

Figure 6: Forest plot of the pooled positive LR and negative LR

89x66mm (144 x 144 DPI)

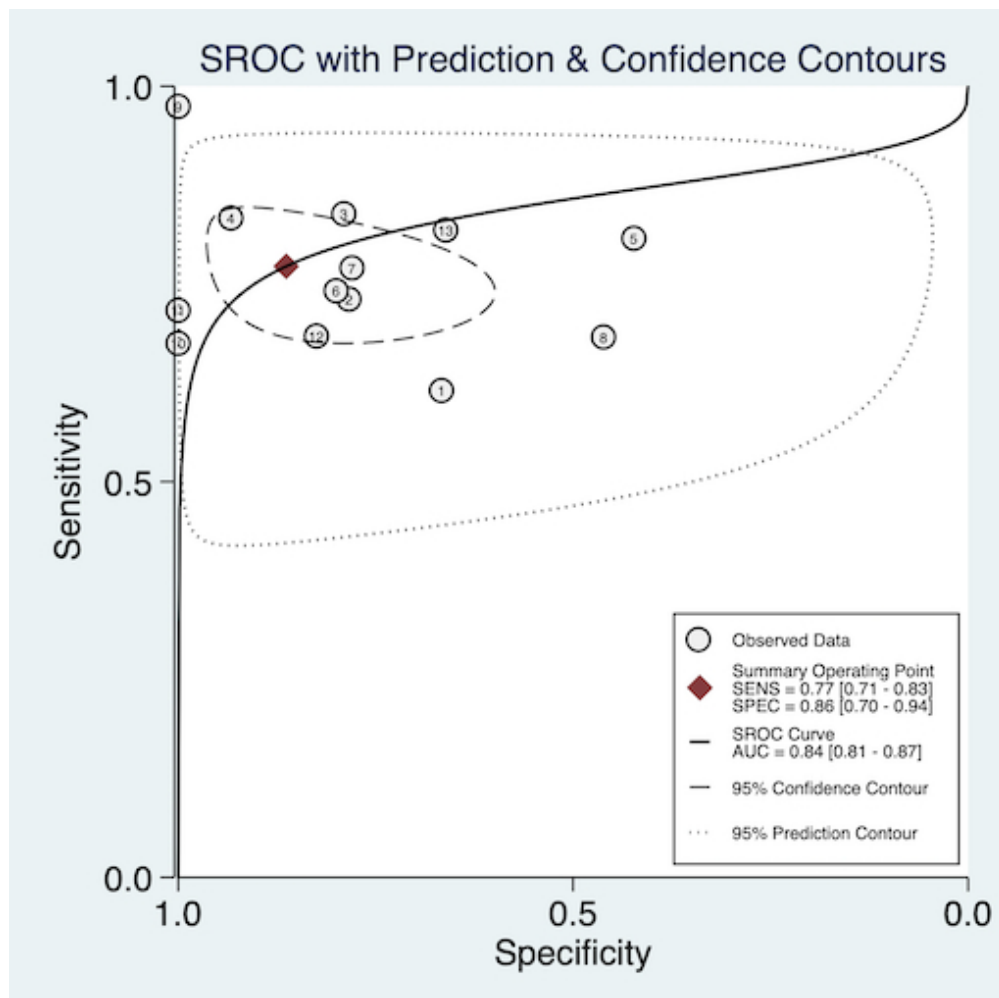

Figure 7: SROC of the neutrophil to lymphocyte ratio for the diagnosis of sepsis

89x89mm (144 x 144 DPI)



1  
2  
3  
4  
5  
6  
7  
8  
9  
10  
11  
12  
13  
14  
15  
16  
17  
18  
19  
20  
21  
22  
23  
24  
25  
26  
27  
28  
29  
30  
31  
32  
33  
34  
35  
36  
37  
38  
39  
40  
41  
42  
43  
44  
45  
46  
47  
48  
49  
50  
51  
52  
53  
54  
55  
56  
57  
58  
59  
60

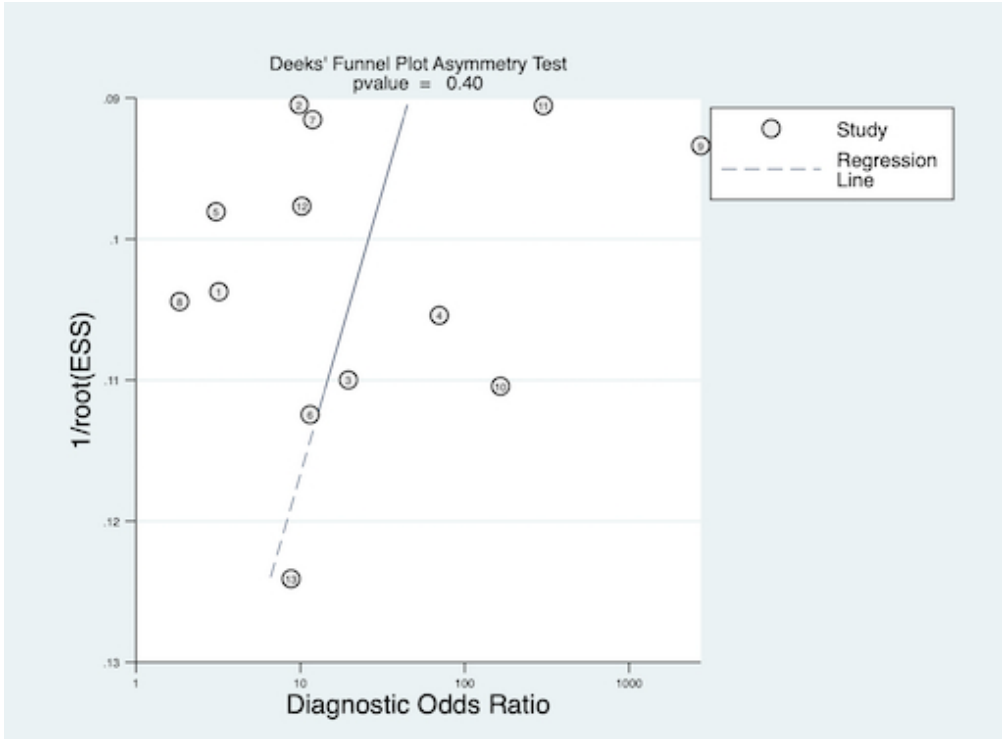

Figure 8: Funnel plot of studies included in the meta-analysis  
89x66mm (144 x 144 DPI)

### Screenshot of search strategy

#### 1.Cochrane

View fewer lines Print

|         |                                                                                                                                                                                                         |        |              |
|---------|---------------------------------------------------------------------------------------------------------------------------------------------------------------------------------------------------------|--------|--------------|
| + #1    | MeSH descriptor: [Infant, Newborn] explode all trees                                                                                                                                                    | MeSH   | 16573        |
| - + #2  | (Infant, Newborn):ti,ab,kw OR (Newborn Infant):ti,ab,kw OR (Newborn):ti,ab,kw OR (Neonate):ti,ab,kw (Word variations have been searched)                                                                | S      | Limits 38906 |
| - + #3  | (sepsis):ti,ab,kw OR (Bloodstream Infection):ti,ab,kw OR (Pyohemia):ti,ab,kw OR (Pyemia):ti,ab,kw OR (Septicemia):ti,ab,kw (Word variations have been searched)                                         | S      | Limits 13401 |
| - + #4  | MeSH descriptor: [Sepsis] explode all trees                                                                                                                                                             | MeSH   | 4701         |
| - + #5  | (Poisoning, Blood):ti,ab,kw OR (Severe Sepsis):ti,ab,kw (Word variations have been searched)                                                                                                            | S      | Limits 4764  |
| - + #6  | #1 or #2                                                                                                                                                                                                | Limits | 38993        |
| - + #7  | #3 or #4 or #5                                                                                                                                                                                          | Limits | 16030        |
| - + #8  | #6 and #7                                                                                                                                                                                               | Limits | 2524         |
| - + #9  | MeSH descriptor: [Neonatal Sepsis] explode all trees                                                                                                                                                    | MeSH   | 78           |
| - + #10 | (Neonatal Sepsis):ti,ab,kw OR (Sepsis, Neonatal Late-Onset):ti,ab,kw OR (Early Onset Sepsis):ti,ab,kw OR (Sepsis, Neonatal Early-Onset):ti,ab,kw OR (LOS):ti,ab,kw (Word variations have been searched) | S      | Limits 14142 |
| - + #11 | #9 or #10                                                                                                                                                                                               | Limits | 14192        |
| - + #12 | #11 or #8                                                                                                                                                                                               | Limits | 16179        |
| - + #13 | (Neutrophil and lymphocyte ratio):ti,ab,kw OR (Neutrophil to lymphocyte ratio):ti,ab,kw OR (nlr):ti,ab,kw (Word variations have been searched)                                                          | S      | Limits 776   |
| - + #14 | #13 and #12                                                                                                                                                                                             | Limits | 4            |

#### 2.Embase

Embase Search Emtree Journals Results My tools ? yu xin

#2 'newborn':ab,ti 162,574  
#1 'newborn':exp 625,339

125 results for search #33 Set email alert Set RSS feed Search details Index miner

Sources Embase, MEDLINE

Query ((('newborn':exp OR 'infant, newborn':ab,ti OR 'newborn':ab,ti OR 'neonate':ab,ti) AND ('sepsis':exp OR 'sepsis':ab,ti OR 'bloodstream infection':ab,ti OR 'pyohemia':ab,ti OR 'pyemia':ab,ti OR 'septicemia':ab,ti OR 'poisoning, blood':ab,ti OR 'severe sepsis':ab,ti) OR 'newborn sepsis':exp OR 'newborn sepsis':ab,ti OR 'neonatal sepsis':ab,ti OR 'sepsis, neonatal late-onset':ab,ti OR 'early onset sepsis':ab,ti OR 'sepsis, neonatal early-onset':ab,ti OR 'los':ab,ti OR 'eos':ab,ti) AND ('neutrophil lymphocyte ratio':exp OR 'neutrophil lymphocyte ratio':ab,ti OR 'neutrophil and lymphocyte ratio':ab,ti OR 'neutrophil to lymphocyte ratio':ab,ti OR 'nlr':ab,ti))

Mapped terms n/a

Results View Print Export Email Add to Clipboard 1 - 125

Select number of items Selected: 0 (clear) Show all abstracts Sort by: Relevance Author Publication Year Entry Date

- The systemic inflammation index on admission is independently associated with length of stay in hospitalized COVID-19 patients  
Zinellu A, Scano V, Masotto E, de Riu G, Vaira LA, Carru C, Pirina P, Babudieri S, Mangoni AA, Fois AG. [In Process] *Minerva Respiratory Medicine* 2021 43:4 (609-615)  
Embase Abstract Index Terms View Full Text Similar records
- Predicting bacteraemia in maternity patients using full blood count parameters: A supervised machine learning algorithm approach  
Mooney C, Eogan M, Ni Ainle F, Cleary B, Gallagher JJ, O'Loughlin J, Drew RJ. *International Journal of Laboratory Hematology* 2021 43:4 (609-615)  
Embase MEDLINE Abstract Index Terms View Full Text Similar records
- Preoperative Neutrophil-Lymphocyte Ratio Can Predict Outcomes for Patients Undergoing Tetralogy of Fallot Repair  
Manuel V, Miana LA, Guerreiro G.P., Turquetto A., Santos R.M., Fernandes N., Tenório D.F., Canejo L.F., Jatene M.B. *Brazilian Journal of Cardiac Surgery* 2021  
Embase Abstract Index Terms View Full Text Similar records

### 3. Pubmed

History and Search Details Download Delete

| Search | Actions | Details | Query                                                                                                                                                                                                                                                                                                                                                                                                                                                                                                                                                                                                                                                                                                                                                                                                                                                                                                                                                                                                                                                                                                                                                                                                                                                                                                                                                                                                                                                                                                                                                                                                                                                                                                                                                                                                                                                                                                                                                                                                                                                                                                | Results | Time     |
|--------|---------|---------|------------------------------------------------------------------------------------------------------------------------------------------------------------------------------------------------------------------------------------------------------------------------------------------------------------------------------------------------------------------------------------------------------------------------------------------------------------------------------------------------------------------------------------------------------------------------------------------------------------------------------------------------------------------------------------------------------------------------------------------------------------------------------------------------------------------------------------------------------------------------------------------------------------------------------------------------------------------------------------------------------------------------------------------------------------------------------------------------------------------------------------------------------------------------------------------------------------------------------------------------------------------------------------------------------------------------------------------------------------------------------------------------------------------------------------------------------------------------------------------------------------------------------------------------------------------------------------------------------------------------------------------------------------------------------------------------------------------------------------------------------------------------------------------------------------------------------------------------------------------------------------------------------------------------------------------------------------------------------------------------------------------------------------------------------------------------------------------------------|---------|----------|
| #17    | ...     | ▼       | <p>Search: ((Neutrophil to lymphocyte ratio[Title/Abstract]) OR (nor[Title/Abstract])) AND (((((((((((Neonatal Sepsis[Title/Abstract]) OR (Neonatal Sepses[Title/Abstract]) OR (Late-Onset Sepsis[Title/Abstract]) OR (Sepsis, Neonatal Late-Onset[Title/Abstract]) OR (Early Onset Sepsis[Title/Abstract]) OR (Sepsis, Neonatal Early-Onset[Title/Abstract]) OR (LOS[Title/Abstract]) OR (EOS[Title/Abstract]) OR ("Neonatal Sepsis"[Mesh]) OR ("Sepsis"[Mesh]) OR (((((((sepsis[Title/Abstract]) OR (Bloodstream Infection[Title/Abstract]) OR (Pyemias[Title/Abstract]) OR (Pyohemia[Title/Abstract]) OR (Pyaemia[Title/Abstract]) OR (Septicemia[Title/Abstract]) OR (Poisoning, Blood[Title/Abstract]) OR (Severe Sepsis[Title/Abstract]))) AND ("Infant, Newborn"[Mesh]) OR (((Infant, Newborn[Title/Abstract]) OR (Newborn Infant[Title/Abstract]) OR (Newborn[Title/Abstract]) OR (Neonate[Title/Abstract])))))))</p> <p>("neutrophil to lymphocyte ratio"[Title/Abstract] OR "nor"[Title/Abstract]) AND ("Neonatal Sepsis"[Title/Abstract] OR "neonatal sepsis"[Title/Abstract] OR "late onset sepsis"[Title/Abstract] OR ("Sepsis"[MeSH Terms] OR "Sepsis"[All Fields]) AND "neonatal late onset"[Title/Abstract] OR "early onset sepsis"[Title/Abstract] OR ("Sepsis"[MeSH Terms] OR "Sepsis"[All Fields]) AND "neonatal early onset"[Title/Abstract] OR "LOS"[Title/Abstract] OR "EOS"[Title/Abstract] OR "Neonatal Sepsis"[MeSH Terms] OR ("Sepsis"[MeSH Terms] OR "Sepsis"[Title/Abstract] OR "bloodstream infection"[Title/Abstract] OR "Pyemias"[Title/Abstract] OR "Pyohemia"[Title/Abstract] OR "Pyaemia"[Title/Abstract] OR "Septicemia"[Title/Abstract] OR "poisoning blood"[Title/Abstract] OR "severe sepsis"[Title/Abstract])) AND ("infant, newborn"[MeSH Terms] OR ("infant newborn"[Title/Abstract] OR "newborn infant"[Title/Abstract] OR "Newborn"[Title/Abstract] OR "Neonate"[Title/Abstract]))))</p> <p><b>Translations</b></p> <p><b>Sepsis:</b> "sepsis"[MeSH Terms] OR "sepsis"[All Fields]</p> <p><b>Sepsis:</b> "sepsis"[MeSH Terms] OR "sepsis"[All Fields]</p> | 37      | 23:33:07 |

截屏

### 4. Web of science

检索历史:

| 检索式 | 检索结果    | 操作                                                                                                                                                                                                                                                                                                                  | 编辑检索式 | 删除检索式                    |                          |
|-----|---------|---------------------------------------------------------------------------------------------------------------------------------------------------------------------------------------------------------------------------------------------------------------------------------------------------------------------|-------|--------------------------|--------------------------|
| #7  | 95      | #6 AND #5<br>索引=SCI-EXPANDED, SSCI, A&HCI, CPCJ-S, CPCL-SSH, BKCI-S, BKCI-SSH, ESCI, CCR-EXPANDED, IC 时间跨度=所有年份                                                                                                                                                                                                     | 取消    | ---                      | ---                      |
| #6  | 17,131  | 主题: (Neutrophil and lymphocyte ratio) OR 主题: (Neutrophil to lymphocyte ratio) OR 主题: (nlr)<br>索引=SCI-EXPANDED, SSCI, A&HCI, CPCJ-S, CPCL-SSH, BKCI-S, BKCI-SSH, ESCI, CCR-EXPANDED, IC 时间跨度=所有年份                                                                                                                    | 编辑    | <input type="checkbox"/> | <input type="checkbox"/> |
| #5  | 109,354 | #4 OR #3<br>索引=SCI-EXPANDED, SSCI, A&HCI, CPCJ-S, CPCL-SSH, BKCI-S, BKCI-SSH, ESCI, CCR-EXPANDED, IC 时间跨度=所有年份                                                                                                                                                                                                      | 编辑    | <input type="checkbox"/> | <input type="checkbox"/> |
| #4  | 105,899 | 主题: (Neonatal Sepsis) OR 主题: (Neonatal Sepses) OR 主题: (Late-Onset Sepsis) OR 主题: (Sepsis, Neonatal Late-Onset) OR 主题: (Early Onset Sepsis)<br>OR 主题: (Sepsis, Neonatal Early-Onset) OR 主题: (LOS) OR 主题: (EOS)<br>索引=SCI-EXPANDED, SSCI, A&HCI, CPCJ-S, CPCL-SSH, BKCI-S, BKCI-SSH, ESCI, CCR-EXPANDED, IC 时间跨度=所有年份 | 编辑    | <input type="checkbox"/> | <input type="checkbox"/> |
| #3  | 10,142  | #2 AND #1<br>索引=SCI-EXPANDED, SSCI, A&HCI, CPCJ-S, CPCL-SSH, BKCI-S, BKCI-SSH, ESCI, CCR-EXPANDED, IC 时间跨度=所有年份                                                                                                                                                                                                     | 编辑    | <input type="checkbox"/> | <input type="checkbox"/> |
| #2  | 161,176 | 主题: (sepsis) OR 主题: (Bloodstream Infection) OR 主题: (Pyohemia) OR 主题: (Pyaemia) OR 主题: (Septicemia) OR 主题: (Poisoning, Blood) OR 主题: (Severe Sepsis)<br>索引=SCI-EXPANDED, SSCI, A&HCI, CPCJ-S, CPCL-SSH, BKCI-S, BKCI-SSH, ESCI, CCR-EXPANDED, IC 时间跨度=所有年份                                                           | 编辑    | <input type="checkbox"/> | <input type="checkbox"/> |
| #1  | 237,926 | 主题: (Infant, Newborn) OR 主题: (Newborn Infant) OR 主题: (Newborn) OR 主题: (Neonate)<br>索引=SCI-EXPANDED, SSCI, A&HCI, CPCJ-S, CPCL-SSH, BKCI-S, BKCI-SSH, ESCI, CCR-EXPANDED, IC 时间跨度=所有年份                                                                                                                               | 编辑    | <input type="checkbox"/> | <input type="checkbox"/> |

AND OR 全选 组配 删除

### 5. CNKI

1  
2  
3  
4  
5  
6  
7  
8  
9  
10  
11  
12  
13  
14  
15  
16  
17  
18  
19  
20  
21  
22  
23  
24  
25  
26  
27  
28  
29  
30  
31  
32  
33  
34  
35  
36  
37  
38  
39  
40  
41  
42  
43  
44  
45  
46  
47  
48  
49  
50  
51  
52  
53  
54  
55  
56  
57  
58  
59  
60

已选 (149)      共149条结果

| <input checked="" type="checkbox"/>                                                                                                                                                                                                                                                                                                                                                                                                                                                                                                    | 题名                                                            | (第一)作者/主编          | 来源       | 发表时间       | 数据库 | 删除                               |
|----------------------------------------------------------------------------------------------------------------------------------------------------------------------------------------------------------------------------------------------------------------------------------------------------------------------------------------------------------------------------------------------------------------------------------------------------------------------------------------------------------------------------------------|---------------------------------------------------------------|--------------------|----------|------------|-----|----------------------------------|
| 条件: 主题 = (早产儿+新生儿+脓毒症+败血症+新生儿脓毒症+血液中毒+早发性败血症+晚发性败血症+中英文扩展(Los)+中英文扩展(EOS)) AND 主题 = (中性粒细胞比值+中英文扩展(nlr)) 或者 (题名 = (早产儿+新生儿+脓毒症+败血症+新生儿脓毒症+血液中毒+早发性败血症+晚发性败血症+中英文扩展(Los)+中英文扩展(EOS)) 或者 题名 = (中性粒细胞比值+中英文扩展(nlr)) 或者 (title=中英文扩展((早产儿+中英文扩展(新生儿+中英文扩展(脓毒症+中英文扩展(败血症)+中英文扩展(新生儿脓毒症)+中英文扩展(血液中毒)+中英文扩展(早发性败血症)+中英文扩展(晚发性败血症)+Los)+EOS)) 或者 title=中英文扩展((中性粒细胞比值+nlr)) 或者 (v_subject=中英文扩展((早产儿+中英文扩展(新生儿+中英文扩展(脓毒症+中英文扩展(败血症)+中英文扩展(新生儿脓毒症)+中英文扩展(血液中毒)+中英文扩展(早发性败血症)+中英文扩展(晚发性败血症)+Los)+EOS)) 或者 v_subject=中英文扩展((中性粒细胞比值+nlr))) (模糊匹配) |                                                               |                    |          |            |     |                                  |
| <input checked="" type="checkbox"/>                                                                                                                                                                                                                                                                                                                                                                                                                                                                                                    | 中性粒细胞/淋巴细胞比值辅助诊断老年社区获得性细菌感染的研究                                | 李佩琳;王春梅;           | 中国临床医生杂志 | 2021-08-04 | 期刊  | <input type="button" value="X"/> |
| <input checked="" type="checkbox"/>                                                                                                                                                                                                                                                                                                                                                                                                                                                                                                    | 外周血EOS、NLR联合检测诊断慢性鼻-鼻窦炎价值分析                                   | 连刚;徐静;雷小平;         | 中国实验诊断学  | 2021-07-25 | 期刊  | <input type="button" value="X"/> |
| <input checked="" type="checkbox"/>                                                                                                                                                                                                                                                                                                                                                                                                                                                                                                    | 中性粒细胞与淋巴细胞比值及其变化率与血小板容积指数对脓毒症患儿预后的预测价值                        | 崔娜娜;肖璐芳;李斌;杜玲;潘星宇; | 检验医学与临床  | 2021-07-14 | 期刊  | <input type="button" value="X"/> |
| <input checked="" type="checkbox"/>                                                                                                                                                                                                                                                                                                                                                                                                                                                                                                    | 经腹腔镜取石术后脓毒症血症发生情况及髓样细胞可溶性触发受体-1、超敏C反应蛋白、中性粒细胞与淋巴细胞比值联合检测的预测价值 | 杨海涛;谭毅群;贺德华;王以兵;   | 临床外科杂志   | 2021-06-20 | 期刊  | <input type="button" value="X"/> |
| <input checked="" type="checkbox"/>                                                                                                                                                                                                                                                                                                                                                                                                                                                                                                    | 通腑泻肺方治疗脓毒症相关急性呼吸窘迫综合征疗效观察                                     | 秦杰;黄道超;张陶;冯百晓;     | 浙江中医杂志   | 2021-06-16 | 期刊  | <input type="button" value="X"/> |

### 6.Wanfang

高级检索 专业检索 作者发文检索

文献类型:

检索信息:   主题: 新生儿 or 早产儿 or 脓毒症 or 败血症 or 新生儿败血症 or 新生儿脓毒症 or 早发性败 模糊

与  主题: 中性粒细胞淋巴细胞比值 or nlr 模糊

与  题名: 模糊

发表时间:  -

智能检索:

or 主题:(败血症) x 主题:(新生儿 or ... x 主题:(新生儿 or ... x 主题:(新生儿 ... x 主题:(新生儿 or ... x

检索表达式 (中英文扩展&主题词扩展): 主题:(新生儿 or 早产儿 or 脓毒症 or 败血症 or 新生儿败血症 or 新生儿脓毒症 or 早发性败血症 or 迟发性败血症) and 主题:(中性粒细胞淋巴细胞比值 or nlr)

资源类型:  (116)  (44)  (63)

排序:    获取范围   批量选择 (已选择 0 条)     只看核心期刊论文

1.早发型新生儿败血症NLR、ELR和PLR指标变化及临床意义

找到 250 条结果

### 7.VIP

任意字段=新生儿败血症+... x 任意字段=新生儿败血症+... x 任意字段=新生儿败血症+... x 题名或关键词=新生儿败血症... x 任意字段=新生儿败血症+... x

二次检索

共找到 55 篇文章

每页显示 20

任意字段=新生儿败血症+迟发性败血症  
+nos+eos+早发性败血症+晚发性败血症+neonatal sepsis+neonatal septicemia+neonate septicemia+septicemia of newborn 新生儿败血症+新生儿败血症 AND 任意字段=中性粒细胞与淋巴细胞比值+Neutrophil and lymphocyte ratio+neutrophil-to-lymphocyte ratio+中性粒细胞与淋巴细胞比值+中性粒细胞淋巴细胞比值

已选择 0 条

导出题录 引用分析 统计分析 相关度排序 被引量排序 时效性排序 显示方式: 正文

题名 请输入检索词

在结果中检索 在结果中去除

年份

- 2021 4
- 2020 6
- 2019 8
- 2018 6
- 2017 5

学科

- 医药卫生 53

期刊收录

- 化学文摘(网络版) 35
- 中国科技核心期刊 33

超敏C反应蛋白、白细胞计数及中性粒细胞分类在新生儿败血症早期诊断中的临床分析

被引量: 3

作者: 李梅, 夏宏林. 《牡丹江医学院学报》. 2014年第4期20-22,共3页

目的: 探讨超敏C反应蛋白、外周血白细胞计数、中性粒细胞分类检测在新生儿败血症的早期诊断和治疗的应用。方法: 选2011-12-2013-06间在我院治疗的已确诊的细菌感染40例新生儿, 另外选取同期住院治疗确诊的病毒感染40例新生儿, ... 展开更多

关键词: 新生儿败血症 超敏C反应蛋白 白细胞计数 中性粒细胞分类

在线阅读 下载PDF

血中性粒细胞/淋巴细胞比值嗜酸性粒细胞对急性呼吸窘迫综合征患者28天死亡风险的预测价值

被引量: 2

作者: 严晓燕, 隋立伟, 46位作者 李小东. 《中国急救医学》(CAS) (CSCD) (北大核心). 2020年第5期427-431,共5页

目的: 评估血中性粒细胞/淋巴细胞比值(NLR)、嗜酸性粒细胞(EOS)对急性呼吸窘迫综合征(ARDS)患者28 d死亡风险的预测价值, 探讨预测ARDS患者预后的方法。方法: 回顾性分析2017年1月至2019年1月承德医学院附属医院收治的85例ARDS患者的临床... 展开更多

关键词: 急性呼吸窘迫综合征(ARDS) 中性粒细胞与淋巴细胞比值(NLR) 嗜酸性粒细胞(EOS) 预测

文章速读 外周血EOS、NLR联合检测诊断慢性鼻-鼻窦炎价值分析

作者: 连刚, 涂静, 董小平. 《中国实验诊断学》(北大核心). 2021年第7期962-965,共4页

目的: 探讨外周血嗜酸性粒细胞(EOS)、中性粒细胞与淋巴细胞计数比值(NLR)联合检测诊断慢性鼻-鼻窦炎(CRS)价值。方法: 选取2017年6月-2020

### 8.China Biomedical Literature Database

学术分析 统计报告 临床医学知识

欢迎 宁夏医科大学总院 | 退出

SinoMed 中国生物医学文献服务系统

专注医学 精益求精

我的空间 帮助中心

首页 文献检索 引文检索 期刊检索 文献传递 数据服务

快速检索 高级检索 主题检索 分类检索 跨库检索

结果筛选

来源

- 中文文献(5)
- 西文文献(20)
- 博硕论文(0)
- 科普文献(0)

主题 学科 时间 期刊 作者 文献类型

详细检索表达式

(((“败血症”[常用字段:智能] OR “败血症”[常用字段:智能]) AND (“新生儿”[常用字段:智能] OR “早产儿”[常用字段:智能]) OR (“新生儿败血症”[常用字段:智能] OR “新生儿败血症”[常用字段:智能] OR “早发性败血症”[常用字段:智能] OR “迟发性败血症”[常用字段:智能]) AND (“中性粒细胞/淋巴细胞比”[常用字段:智能] OR “nlr”[常用字段:智能]))

检索

二次检索

检索条件: (((“败血症”[常用字段:智能] OR “败血症”[常用字段:智能]) AND (“新生儿”[常用字段:智能] OR “早产儿”[常用字段:智能]) OR (“新生儿败血症”[常用字段:智能] OR “新生儿败血症”[常用字段:智能] OR “早发性败血症”[常用字段:智能] OR “迟发性败血症”[常用字段:智能]) AND (“中性粒细胞/淋巴细胞比”[常用字段:智能] OR “nlr”[常用字段:智能]))

年代

全部: 20 | 免费全文: 6 | 协和馆藏: 8 | SCI收录: 0 | FI000: 0 | 循证文献: 1

当前页 显示 题录 每页 20条 排序 入库 我的数据库 文献传递 结果输出

首页 上一页 下一页 尾页 共1页 到第 1 页 确定

1. Nitric oxide inhibits interleukin-1-mediated protection against Escherichia coli K1-induced sepsis and meningitis in a neonatal murine model

作者: Chambers CA(1); Lacey CA(1,2); Brown DC(1); Skyberg JA(1)

作者单位: (1)Department of Veterinary Pathobiology, University of Missouri, Columbia, MO, USA; (2)Department of Immunology, Duke University Medical Center, Durham, NC, USA.

语种: eng

出处: Immunology and cell biology 2021 Jul; 99(6) : 596-610



Table 1 characteristics of the included 13 studies

| Auth or | Year | Selected time | Study design | Sepsis diagnosis | Region | Ear/ly/Late | Case/control | T | F | F | T | S | S | C  | Neonates |
|---------|------|---------------|--------------|------------------|--------|-------------|--------------|---|---|---|---|---|---|----|----------|
| R H     | 201  | 2016          | retrosp      | Blood            | US     | EO          | 52/          | 3 | 1 | 2 | 2 | 6 | 6 | 9. | A、       |
| Rusl    | 8    | -201          | ective       | cultur           | A      | S、          | 42           | 2 | 4 | 0 | 8 | 1 | 6 | 4  | B、       |
| ie[9]   |      | 7             |              | e                |        | LO          |              |   |   |   |   | . | . |    | C        |
|         |      |               |              |                  |        | S           |              |   |   |   |   | 5 | 7 |    |          |
| Sen     | 2017 | 2014          | Prospe       | Blood            | Tu     | LO          | 52/          | 3 | 1 | 1 | 5 | 7 | 7 | 1. | A        |
| em      |      | -201          | ctive        | cultur           | rke    | S           | 75           | 8 | 6 | 4 | 8 | 3 | 8 | 7  |          |
| Alka    |      | 5             |              | e                | y      |             |              |   |   |   |   |   |   |    | 7        |
| n       |      |               |              |                  |        |             |              |   |   |   |   |   |   |    |          |
| Ozd     |      |               |              |                  |        |             |              |   |   |   |   |   |   |    |          |
| emir    |      |               |              |                  |        |             |              |   |   |   |   |   |   |    |          |
| [10]    |      |               |              |                  |        |             |              |   |   |   |   |   |   |    |          |
| Ori     | 202  | 2016          | Retrosp      | Blood            | Isr    | LO          | 31/          | 2 | 1 | 5 | 4 | 8 | 7 | 1. | A、       |
| Gold    | 0    | -201          | ective       | cultur           | ael    | S           | 62           | 6 | 3 |   | 9 | 3 | 9 | 5  | B、       |
| berg    |      | 9             |              | e                |        |             |              |   |   |   |   | . |   |    | C        |
| [11]    |      |               |              |                  |        |             |              |   |   |   |   |   |   |    | 9        |

|       |     |      |          |        |     |    |     |   |   |   |   |   |   |    |      |
|-------|-----|------|----------|--------|-----|----|-----|---|---|---|---|---|---|----|------|
| Roc   | 201 | 2017 | Cross-   | Blood  | Ind | EO | 90/ | 7 | 2 | 1 | 2 | 8 | 9 | 1. | A、   |
| ky    | 8   | -201 | section  | cultur | on  | S  | 30  | 5 |   | 5 | 8 | 3 | 3 | 2  | B、   |
| Wila  |     | 7    | al study | e      | esi |    |     |   |   |   |   | . | . | 4  | C    |
| r,    |     |      |          |        | a   |    |     |   |   |   |   | 3 | 3 |    |      |
| MD    |     |      |          |        |     |    |     |   |   |   |   |   |   |    |      |
| [12]  |     |      |          |        |     |    |     |   |   |   |   |   |   |    |      |
| Kha   | 202 | 2019 | Cross-   | Blood  | Ind | EO | 52/ | 4 | 3 | 1 | 2 | 8 | 4 | 2. | A、   |
| dija  | 1   | -201 | section  | cultur | on  | S、 | 52  | 2 | 0 | 0 | 2 | 0 | 2 | 1  | B、   |
| h     |     | 9    | al study | e      | esi | LO |     |   |   |   |   | . | . | 2  | C    |
| Rizk  |     |      |          |        | a   | S  |     |   |   |   |   | 8 | 3 |    |      |
| y     |     |      |          |        |     |    |     |   |   |   |   |   |   |    |      |
| Sum   |     |      |          |        |     |    |     |   |   |   |   |   |   |    |      |
| itro[ |     |      |          |        |     |    |     |   |   |   |   |   |   |    |      |
| 13]   |     |      |          |        |     |    |     |   |   |   |   |   |   |    |      |
| Xiao  | 201 | 2015 | Retrosp  | Blood  | Ch  | EO | 58/ | 4 | 6 | 1 | 2 | 7 | 8 | 0. | uncl |
| yu    | 9   | -201 | ective   | cultur | ina | S、 | 30  | 3 |   | 5 | 4 | 3 | 1 | 7  | ear  |
| Du    |     | 7    |          | e      |     | LO |     |   |   |   |   | . |   |    |      |
| [14]  |     |      |          |        |     | S  |     |   |   |   |   |   | 3 |    |      |
| Shuj  | 202 | 2018 | Descrip  | Blood  | Ch  | EO | 74/ | 5 | 1 | 1 | 3 | 7 | 7 | 3. | A、   |
| ian   | 1   | -202 | tive     | cultur | ina | S  | 50  | 7 | 1 | 7 | 9 | 7 | 8 | 1  | B、   |
| Zha   |     | 0    | study    | e      |     |    |     |   |   |   |   |   |   | 6  | C    |
| ng    |     |      |          |        |     |    |     |   |   |   |   |   |   | 9  |      |

[15]

Sant 202 2018 Retrosp Blood Phi EO 41/ 2 2 1 2 6 4 1. A,  
 osh 1 -201 ective cultur lip S, 52 8 8 3 4 8 6 7 B,  
 K. 8 e pin LO . . C  
 Pan es S 3 2  
 da

[16]

Emr 2017 2015 Prospe Blood Tu EO 78/ 7 0 2 4 9 1 6. B  
 ah -201 ctive cultur rke S 44 6 4 7 0 7  
 Can, 7 e y . 0 6  
 MD 4

[17]

Nag 202 2018 Prospe Blood Eg EO 40/ 2 0 1 4 6 9 0. B  
 wa 0 -201 ctive cultur ypt S 40 7 3 0 7 9 1  
 Moh 9 e  
 ame  
 d  
 ,  
 SA

M[1  
 8]

Sara 202 2018 Retrosp Blood Eg EO 60/ 4 0 1 6 7 1 1 A,



|      |     |      |         |        |     |    |     |   |   |   |   |   |   |       |
|------|-----|------|---------|--------|-----|----|-----|---|---|---|---|---|---|-------|
| Moh  | 1   | -201 | ective  | cultur | ypt | S  | 60  | 3 | 7 | 0 | 2 | 0 |   | B     |
| ame  |     | 9    |         | e      |     |    |     |   |   |   |   | 0 |   |       |
| d    |     |      |         |        |     |    |     |   |   |   |   |   |   |       |
| Mira |     |      |         |        |     |    |     |   |   |   |   |   |   |       |
| [19] |     |      |         |        |     |    |     |   |   |   |   |   |   |       |
| Ipek | 202 | 2016 | Retrosp | Blood  | Tu  | LO | 76/ | 5 | 7 | 2 | 3 | 6 | 8 | 1. A  |
| Gun  | 0   | -201 | ective  | cultur | rke | S  | 40  | 2 | 4 | 3 | 8 | 2 | 5 |       |
| ey   |     | 8    |         | e      | y   |    |     |   |   |   |   |   | 7 |       |
| Vara |     |      |         |        |     |    |     |   |   |   |   |   |   |       |
| I    |     |      |         |        |     |    |     |   |   |   |   |   |   |       |
| [20] |     |      |         |        |     |    |     |   |   |   |   |   |   |       |
| Heri | 202 | 2018 | Retrosp | Blood  | Ind | EO | 22/ | 1 | 2 | 4 | 4 | 8 | 6 | 2. A, |
| yant | 1   | -201 | ective  | cultur | on  | S, | 62  | 8 | 1 |   | 1 | 1 | 6 | 3 B   |
| o    |     | 8    |         | e      | esi | LO |     |   |   |   |   |   |   | 1     |
| Lim  |     |      |         |        | a   | S  |     |   |   |   |   | 8 | 1 |       |
| [21] |     |      |         |        |     |    |     |   |   |   |   |   |   |       |

EOS: Early-onset sepsis, LOS: Late-onset sepsis, A: Preterm, B: Term, C: Late term

**Table 2 The result of meta-regression**

| Parameter   | category | LRTChi <sup>2</sup> | <i>P</i> value | <i>I</i> <sup>2</sup> | <i>I</i> <sup>2</sup> lo | <i>I</i> <sup>2</sup> hi |
|-------------|----------|---------------------|----------------|-----------------------|--------------------------|--------------------------|
| Asia        | Yes      | 11.64               | 0              | 83                    | 64                       | 100                      |
|             | No       |                     |                |                       |                          |                          |
| Year        | Yes      | 1.61                | 0.45           | 0                     | 0                        | 100                      |
|             | No       |                     |                |                       |                          |                          |
| Preterm     | Yes      | 0.79                | 0.67           | 0                     | 0                        | 100                      |
|             | No       |                     |                |                       |                          |                          |
| Prospective | Yes      | 4.86                | 0.09           | 59                    | 7                        | 100                      |
|             | No       |                     |                |                       |                          |                          |

**Table 3 The results of sensitivity analysis**

| Studies                 | Number of studies | Sen(95% CI)     | Spa(95% CI)     | NLR (95%CI)     | PLR (95%CI)   | DOR (95% CI) | AUC (95%CI)     | Q    |
|-------------------------|-------------------|-----------------|-----------------|-----------------|---------------|--------------|-----------------|------|
| Overall                 | 13[9-21]          | 0.77[0.71-0.83] | 0.86[0.70-0.94] | 0.26[0.19-0.37] | 5.6[2.3-13.8] | 21[7-69]     | 0.84[0.81-0.87] | 43.1 |
| Removal of non-Astorian | 10[10-17,20-21]   | 0.80[0.72-0.86] | 0.80[0.63-0.91] | 0.26[0.16-0.41] | 4.0[1.9-8.5]  | 16[5-51]     | 0.85[0.82-0.88] | 13.3 |
| Removal of preterm      | 11[9,11-19,21]    | 0.79[0.71-0.85] | 0.88[0.67-0.96] | 0.24[0.16-0.36] | 6.7[2.1-21.5] | 27[6-120]    | 0.86[0.82-0.89] | 45.5 |
| Removal of LOS          | 10[9,12-19,21]    | 0.78[0.70-0.85] | 0.90[0.65-0.98] | 0.24[0.16-0.37] | 7.6[1.9-31.1] | 31[5-177]    | 0.86[0.82-0.88] | 47.8 |

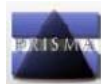

# PRISMA-DTA for Abstracts Checklist

1  
2  
3  
4  
5  
6  
7  
8  
9  
10  
11  
12  
13  
14  
15  
16  
17  
18  
19  
20  
21  
22  
23  
24  
25  
26  
27  
28  
29  
30  
31  
32  
33  
34  
35  
36  
37  
38  
39  
40  
41  
42  
43  
44  
45  
46  
47

| Section/topic                | #  | PRISMA-DTA for Abstracts Checklist item                                                                                                                                                                                                                                                                                                                                                                                                                                                                                                                                                                           | Reported on page # |
|------------------------------|----|-------------------------------------------------------------------------------------------------------------------------------------------------------------------------------------------------------------------------------------------------------------------------------------------------------------------------------------------------------------------------------------------------------------------------------------------------------------------------------------------------------------------------------------------------------------------------------------------------------------------|--------------------|
| <b>TITLE and PURPOSE</b>     |    |                                                                                                                                                                                                                                                                                                                                                                                                                                                                                                                                                                                                                   |                    |
| Title                        | 1  | The accuracy of neutrophil to lymphocyte ratio for the diagnosis of neonatal sepsis: a systematic review and meta-analysis.                                                                                                                                                                                                                                                                                                                                                                                                                                                                                       | 1                  |
| Objectives                   | 2  | The purpose of this study was systematically and quantitatively to assess the value of neutrophil to lymphocyte ratio (NLR) for the diagnosis of neonatal sepsis by systematic review and meta-analysis.                                                                                                                                                                                                                                                                                                                                                                                                          | 2                  |
| <b>METHODS</b>               |    |                                                                                                                                                                                                                                                                                                                                                                                                                                                                                                                                                                                                                   |                    |
| Eligibility criteria         | 3  | (1).The purpose of the study is to evaluate or explore the diagnostic value of the neutrophils to lymphocytes ratio in neonatal sepsis; (2).The case group is newborns with confirmed neonatal sepsis, and the control group is newborns with non-neonatal sepsis; (3).The diagnostic gold standard is blood culture (4).It can directly or indirectly obtain the true positive, false positive, true negative, and false negative values of neutrophil-lymphocyte ratio in the diagnosis of neonatal sepsis; (5).The language is English or Chinese.                                                             | 5                  |
| Information sources          | 4  | We searched the Cochrane, PubMed, Embase, Web of Science, CNKI, Wanfang, China Biomedical Literature Database, and VIP Database for studies on the diagnostic accuracy of neonatal sepsis published before August 2021.                                                                                                                                                                                                                                                                                                                                                                                           | 4                  |
| Risk of bias & applicability | 5  | Assess the quality of the Diagnostic Accuracy Studies-2 (QUADAS-2) checklist.                                                                                                                                                                                                                                                                                                                                                                                                                                                                                                                                     | 6-7                |
| Synthesis of results         | A1 | Random effects model.                                                                                                                                                                                                                                                                                                                                                                                                                                                                                                                                                                                             |                    |
| <b>RESULTS</b>               |    |                                                                                                                                                                                                                                                                                                                                                                                                                                                                                                                                                                                                                   |                    |
| Included studies             | 6  | 13 studies were finally included, with 1365 newborns, including 726 in the study group and 639 in the control group. Among them, 3 were late-onset sepsis, 5 were early-onset sepsis, and 2 were preterm infants. Ten studies are from Asia, and three studies are from non-Asia.                                                                                                                                                                                                                                                                                                                                 | 6                  |
| Synthesis of results         | 7  | The pooled sensitivity of the ratio of in the diagnosis of neonatal sepsis was 0.77 (0.71-0.83), the pooled specificity was 0.86 (0.70-0.94), the positive likelihood ratio was 5.6(2.3-13.8), the negative likelihood ratio was 0.26(0.19-0.37), the diagnostic odds ratio was 21(95 % CI 7-69), area under the curve (AUC) was 0.84(0.81-0.87).                                                                                                                                                                                                                                                                 | 7                  |
| <b>DISCUSSION</b>            |    |                                                                                                                                                                                                                                                                                                                                                                                                                                                                                                                                                                                                                   |                    |
| Strengths and limitations    | 9  | (1). Although it is homogeneous to reduce the choice of bias applications, heterogeneity is still in the inclusive research. (2). The diagnosis of newborns will also have differences due to different researchers, which will result in false positive and false negative results for the diagnosis of neonatal sepsis, which in turn leads to bias. (3). A part of the included research is a retrospective study, so there may be a selection of research objects. (4). The included research comes from different countries, and newborns have different immunity in newborns of different races and gender. | 9                  |
| Interpretation               | 10 | The early diagnosis of neonatal sepsis is particularly important. The ratio of neutrophils to lymphocytes has high sensitivity and specificity for its early diagnosis. It can provide a warning for the clinic and take corresponding measures in time.                                                                                                                                                                                                                                                                                                                                                          | 10                 |
| <b>OTHER</b>                 |    |                                                                                                                                                                                                                                                                                                                                                                                                                                                                                                                                                                                                                   |                    |
| Funding                      | 11 | None                                                                                                                                                                                                                                                                                                                                                                                                                                                                                                                                                                                                              |                    |

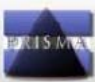

# PRISMA-DTA for Abstracts Checklist

1  
2  
3  
4  
5  
6  
7  
8  
9  
10  
11  
12  
13  
14  
15  
16  
17  
18  
19  
20  
21  
22  
23  
24  
25  
26  
27  
28  
29  
30  
31  
32  
33  
34  
35  
36  
37  
38  
39  
40  
41  
42  
43  
44  
45  
46  
47

|              |    |                          |  |
|--------------|----|--------------------------|--|
| Registration | 12 | Prospero: CRD42021278881 |  |
|--------------|----|--------------------------|--|

*Adapted From:* McInnes MDF, Moher D, Thombs BD, McGrath TA, Bossuyt PM, The PRISMA-DTA Group (2018). Preferred Reporting Items for a Systematic Review and Meta-analysis of Diagnostic Test Accuracy Studies: The PRISMA-DTA Statement. JAMA. 2018 Jan 23;319(4):388-396. doi: 10.1001/jama.2017.19163.

For more information, visit: [www.prisma-statement.org](http://www.prisma-statement.org).

For peer review only



# PRISMA-DTA Checklist

1  
2  
3  
4  
5  
6  
7  
8  
9  
10  
11  
12  
13  
14  
15  
16  
17  
18  
19  
20  
21  
22  
23  
24  
25  
26  
27  
28  
29  
30  
31  
32  
33  
34  
35  
36  
37  
38  
39  
40  
41  
42  
43  
44  
45  
46  
47

| Section/topic                   | #  | PRISMA-DTA Checklist Item                                                                                                                                                                                                                                                                                                                                                                                                                                                                                                                             | Reported on page # |
|---------------------------------|----|-------------------------------------------------------------------------------------------------------------------------------------------------------------------------------------------------------------------------------------------------------------------------------------------------------------------------------------------------------------------------------------------------------------------------------------------------------------------------------------------------------------------------------------------------------|--------------------|
| <b>TITLE / ABSTRACT</b>         |    |                                                                                                                                                                                                                                                                                                                                                                                                                                                                                                                                                       |                    |
| Title                           | 1  | The accuracy of neutrophil to lymphocyte ratio for the diagnosis of neonatal sepsis: a systematic review and meta-analysis                                                                                                                                                                                                                                                                                                                                                                                                                            | 1                  |
| Abstract                        | 2  | Abstract: See PRISMA-DTA for abstracts.                                                                                                                                                                                                                                                                                                                                                                                                                                                                                                               | /                  |
| <b>INTRODUCTION</b>             |    |                                                                                                                                                                                                                                                                                                                                                                                                                                                                                                                                                       |                    |
| Rationale                       | 3  | The neutrophil to lymphocyte ratio (NLR) is an independent predictor in clinical that has been widely used in various diseases, such as Immune system disease, tumors, cancers, etc. Many studies have shown that the ratio of neutrophils to lymphocytes is more reliable for diagnosing neonatal sepsis than neutrophil counts or lymphocyte counts alone. Nevertheless, there still has a dispute about diagnosing the effectiveness of neonatal sepsis.                                                                                           | 2                  |
| Clinical role of index test     | D1 | /                                                                                                                                                                                                                                                                                                                                                                                                                                                                                                                                                     |                    |
| Objectives                      | 4  | The purpose of this study was systematically and quantitatively to assess the value of neutrophil to lymphocyte ratio (NLR) for the diagnosis of neonatal sepsis by systematic review and meta-analysis.                                                                                                                                                                                                                                                                                                                                              | 2                  |
| <b>METHODS</b>                  |    |                                                                                                                                                                                                                                                                                                                                                                                                                                                                                                                                                       |                    |
| Protocol and registration       | 5  | Prospero: CRD42021278881                                                                                                                                                                                                                                                                                                                                                                                                                                                                                                                              |                    |
| Eligibility criteria            | 6  | (1).The purpose of the study is to evaluate (or explore the diagnostic value of the neutrophils to lymphocytes ratio in neonatal sepsis;(2).The case group is newborns with confirmed neonatal sepsis, and the control group is newborns with non-neonatal sepsis; (3).The diagnostic gold standard is blood culture (4).It can directly or indirectly obtain the true positive, false positive, true negative, and false negative values of neutrophil-lymphocyte ratio in the diagnosis of neonatal sepsis; (5).The language is English or Chinese. | 5                  |
| Information sources             | 7  | We searched the Cochrane, PubMed, Embase, Web of Science, CNKI, Wanfang, China Biomedical Literature Database, and VIP Database for studies on the diagnostic accuracy of neonatal sepsis published before August 2021.                                                                                                                                                                                                                                                                                                                               | 4                  |
| Search                          | 8  | We used a combination of subject words and free words to search the study and the following keywords: "Neutrophil and lymphocyte ratio," "Infant," "Newborn," "Neonate," "sepsis," "septicemia," "Neonatal Sepsis.                                                                                                                                                                                                                                                                                                                                    | 4                  |
| Study selection                 | 9  | Two reviewers independently screened the literature, extracted data and evaluated the included studies according to the inclusion criteria,exclusion criteria and methodological quality. In case of disagreement, discuss and resolve or hand over to a third party assist in ruling.                                                                                                                                                                                                                                                                | 5                  |
| Data collection process         | 10 | Two researchers extract the data according to the designed data extraction table, and finally cross-check the extraction situation. If there is any difference, it will be resolved through discussion and negotiation.                                                                                                                                                                                                                                                                                                                               | 5                  |
| Definitions for data extraction | 11 | There are two authors independently extracted data from the included literature, including the year of publication, country of origin, study design, author, publication year, Newborn birth situation, study location, sample size, case and control numbers, cut-off value, true positive value, false-positive value, false-negative value, true negative value, sensitivity, and specificity.                                                                                                                                                     | 5                  |
| Risk of bias and applicability  | 12 | Assess the quality of the Diagnostic Accuracy Studies-2 (QUADAS-2) checklist.<br>For peer review only - <a href="http://bmjopen.bmj.com/site/about/guidelines.xhtml">http://bmjopen.bmj.com/site/about/guidelines.xhtml</a>                                                                                                                                                                                                                                                                                                                           | 6                  |

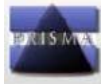

# PRISMA-DTA Checklist

1  
2  
3  
4  
5  
6  
7  
8  
9  
10  
11  
12  
13  
14  
15  
16  
17  
18  
19  
20  
21  
22  
23  
24  
25  
26  
27  
28  
29  
30  
31  
32  
33  
34  
35  
36  
37  
38  
39  
40  
41  
42  
43  
44  
45  
46  
47

|                              |    |                                                                                                                                                                                                                                                                                                                                                                                                                                                                                                                                                                                                                                                                                                                                                                                                                                                                                                                                                                                                                                                                                                                                     |     |
|------------------------------|----|-------------------------------------------------------------------------------------------------------------------------------------------------------------------------------------------------------------------------------------------------------------------------------------------------------------------------------------------------------------------------------------------------------------------------------------------------------------------------------------------------------------------------------------------------------------------------------------------------------------------------------------------------------------------------------------------------------------------------------------------------------------------------------------------------------------------------------------------------------------------------------------------------------------------------------------------------------------------------------------------------------------------------------------------------------------------------------------------------------------------------------------|-----|
| Diagnostic accuracy measures | 13 | ROC curve analysis was used for the included studies to calculate the combined sensitivity, specificity, positive likelihood ratio, negative likelihood ratio, diagnostic odds ratio, and area under the curve (AUC). All results were expressed with 95% CI.                                                                                                                                                                                                                                                                                                                                                                                                                                                                                                                                                                                                                                                                                                                                                                                                                                                                       | 5-6 |
| Synthesis of results         | 14 | The $I^2$ test evaluated study heterogeneity. $I^2 > 50\%$ indicated that the heterogeneity generated in the study would have a specific impact. Meta Disc1.4 software was used to analyze the threshold effect heterogeneity. If the effect sizes of the studies are homogeneous, the fixed-effects model will be used; if they are heterogeneous, the random-effects model will be used. If there is heterogeneity between the studies, the source of the heterogeneity shall be further explored, and the threshold effect and non-threshold effect analysis shall be carried out. The combined sensitivity, combined specificity, combined diagnostic odds ratio (DOR), combined positive likelihood ratio (PLR), combined negative likelihood ratio, and its 95% confidence interval (95%CI) were performed through stata16.0; Simultaneously perform a combined receiver operating characteristic curve (SROC) fitting analysis. At the same time, the Deeks test was used to evaluate the publication bias of the included literature. If $P < 0.05$ , it is considered that the included literature has a publication bias. | 5-6 |

Page 1 of 2

| Section/topic                  | #  | PRISMA-DTA Checklist Item                                                                                                                                                                                                                                                                                                                                                                                                                                                                                                                                                                                                                                                                                                                                                                                            | Reported on page # |
|--------------------------------|----|----------------------------------------------------------------------------------------------------------------------------------------------------------------------------------------------------------------------------------------------------------------------------------------------------------------------------------------------------------------------------------------------------------------------------------------------------------------------------------------------------------------------------------------------------------------------------------------------------------------------------------------------------------------------------------------------------------------------------------------------------------------------------------------------------------------------|--------------------|
| Meta-analysis                  | D2 | Reference no. 14                                                                                                                                                                                                                                                                                                                                                                                                                                                                                                                                                                                                                                                                                                                                                                                                     |                    |
| Additional analyses            | 16 | We conducted subgroup analysis on the early-onset sepsis group, cutoff $>2$ , and cutoff $<2$ , respectively. The sensitivity analysis was performed by excluding premature infants, non-Asian, and late-onset sepsis to explore the heterogeneity, meta-regression analysis of year, region, Study type and birth status of newborn.                                                                                                                                                                                                                                                                                                                                                                                                                                                                                | 7-8                |
| <b>RESULTS</b>                 |    |                                                                                                                                                                                                                                                                                                                                                                                                                                                                                                                                                                                                                                                                                                                                                                                                                      |                    |
| Study selection                | 17 | Preliminary retrieval of 740 pieces of literature, after checking duplicates and reading abstracts, and excluding relevant literature according to the exclusion criteria, 13 studies were finally included. The specific process is shown in (Fig1).                                                                                                                                                                                                                                                                                                                                                                                                                                                                                                                                                                | 6                  |
| Study characteristics          | 18 | The references were included from 2017 to 2021, with 1365 newborns, including 726 in the study group and 639 in the control group. Among them, 3 were late-onset sepsis, 5 were early-onset sepsis, and 2 were preterm infants. Ten studies are from Asia, and three studies are from non-Asia. Basic information of the included literature is shown in (Table 1).                                                                                                                                                                                                                                                                                                                                                                                                                                                  | 6                  |
| Risk of bias and applicability | 19 | The evaluation results of the risk of bias of the included studies are shown in (Fig2、3).                                                                                                                                                                                                                                                                                                                                                                                                                                                                                                                                                                                                                                                                                                                            | 7                  |
| Results of individual studies  | 20 | The research results are displayed in the form of tables and forest diagrams                                                                                                                                                                                                                                                                                                                                                                                                                                                                                                                                                                                                                                                                                                                                         |                    |
| Synthesis of results           | 21 | we found that the sensitivity and specificity of $I^2$ are respectively 68.61% and 90.87%. This indicates that there is considerable heterogeneity. We first conducted a threshold effect test. By using metadisc14.0, we found that the Spearman correlation coefficient was -0.093 $p = 0.762$ ( $p > 0.05$ ). Furthermore, the Proportion of heterogeneity is likely due to threshold effect = 0.23 in stata16.0. It shows no threshold effect heterogeneity, The pooled sensitivity and specificity of neutrophil to lymphocyte ratio in the diagnosis of neonates were 0.77 (95 % CI 0.71-0.83) and 0.86 (95 % CI 0.70-0.94), respectively; PLR was 5.6 (95 % CI 2.3-13.8), and NLR was 0.26 (95 % CI 0.19-0.37), DOR is 21(95 % CI 7-69), area under the curve (AUC) is 0.84(95 % CI 0.81-0.87) (Fig 4,5,6,7). | 7-8                |

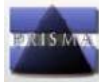

# PRISMA-DTA Checklist

|                     |    |                                                                                                                                                                                                                                                                                                                                                                                                                                                                                                                                                                                                                                                                                                                                                                                                                                                                                                                                                                                                                                                                                                                                                                                                                                                                                                     |     |
|---------------------|----|-----------------------------------------------------------------------------------------------------------------------------------------------------------------------------------------------------------------------------------------------------------------------------------------------------------------------------------------------------------------------------------------------------------------------------------------------------------------------------------------------------------------------------------------------------------------------------------------------------------------------------------------------------------------------------------------------------------------------------------------------------------------------------------------------------------------------------------------------------------------------------------------------------------------------------------------------------------------------------------------------------------------------------------------------------------------------------------------------------------------------------------------------------------------------------------------------------------------------------------------------------------------------------------------------------|-----|
| Additional analysis | 23 | The meta-regression results show that articles in non-Asian regions are the main source of heterogeneity (Table 2). Sensitivity analysis removes non-Asian, preterm, and late-onset sepsis research literature results also show that the region is the main source of heterogeneity. (Table 3)<br>(1).The results of the EOS subgroup analysis showed that the pooled sensitivity and specificity of the neutrophil to lymphocyte ratio in the diagnosis of neonatal sepsis were 0.83 (95 % CI 0.68-0.91) and 0.99 (95 % CI 0.78-1.00); PLR was 91.3 (95 % CI 3.0-2823.6), NLR was 0.18 (95 % CI 0.09-0.34), DOR was 519 (95 % CI 14-19952), and the area under the curve (AUC) was 0.95 (95 % CI 0.93-0.97).<br>(2).Cutoff value >2, pooled sensitivity and specificity are respectively 0.83(95 % CI 0.66-0.93) and 0.80(95 % CI 0.44-0.95) respectively; PLR is 4.1(95 % CI 1.0-17.2), NLR is 0.21(95 % CI 0.07-0.60), DOR is 20 (95 % CI 2-218), the area under the curve (AUC) is 0.88 (95 % CI 0.85-0.91).<br>(3).Cutoff value <2, pooled sensitivity and specificity are respectively 0.74(95 % CI 0.69-0.78) and 0.90(95 % CI 0.71-0.97); PLR is 7.1(95 % CI 2.3-21.8), NLR is 0.29(95 % CI 0.23-0.36), DOR is 25(95 % CI 7-88) The area under the curve (AUC) is 0.77(95 % CI 0.73-0.81). | 7-8 |
| DISCUSSION          |    |                                                                                                                                                                                                                                                                                                                                                                                                                                                                                                                                                                                                                                                                                                                                                                                                                                                                                                                                                                                                                                                                                                                                                                                                                                                                                                     |     |
| Summary of evidence | 24 | A total of 13 studies comprising 1365 newborns were involved in this meta-analysis. The pooled sensitivity of the ratio of in the diagnosis of neonatal sepsis was 0.77 (95 % confidence interval [CI]: 0.71-0.83), the pooled specificity was 0.86 (95 % CI 0.70-0.94), the positive likelihood ratio was 5.6(95 % CI 2.3-13.8), the negative likelihood ratio was 0.26(95 % CI 0.19-0.37), the diagnostic odds ratio was 21(95 % CI 7-69), area under the curve (AUC) was 0.84(95 % CI 0.81-0.87). The results show that the ratio of neutrophils to lymphocytes has moderate diagnostic value for neonatal sepsis.                                                                                                                                                                                                                                                                                                                                                                                                                                                                                                                                                                                                                                                                               | 8-9 |
| Limitations         | 25 | (1). Although it is homogeneous to reduce the choice of bias applications, heterogeneity is still in the inclusive research. (2). The diagnosis of newborns will also have differences due to different researchers, which will result in false positive and false negative results for the diagnosis of neonatal sepsis, which in turn leads to bias. (3). A part of the included research is a retrospective study, so there may be a selection of research objects. (4). The included research comes from different countries, and newborns have different immunity in newborns of different races and gender.                                                                                                                                                                                                                                                                                                                                                                                                                                                                                                                                                                                                                                                                                   | 9   |
| Conclusions         | 26 | The neutrophils to lymphocytes ratio is moderate diagnostic capacity with high sensitivity and specificity for diagnosing neonatal sepsis. It can provide a reference value for the early diagnosis of neonatal sepsis.                                                                                                                                                                                                                                                                                                                                                                                                                                                                                                                                                                                                                                                                                                                                                                                                                                                                                                                                                                                                                                                                             | 10  |
| FUNDING             |    |                                                                                                                                                                                                                                                                                                                                                                                                                                                                                                                                                                                                                                                                                                                                                                                                                                                                                                                                                                                                                                                                                                                                                                                                                                                                                                     |     |
| Funding             | 27 | None                                                                                                                                                                                                                                                                                                                                                                                                                                                                                                                                                                                                                                                                                                                                                                                                                                                                                                                                                                                                                                                                                                                                                                                                                                                                                                |     |

Adapted From: McInnes MDF, Moher D, Thombs BD, McGrath TA, Bossuyt PM, The PRISMA-DTA Group (2018). Preferred Reporting Items for a Systematic Review and Meta-analysis of Diagnostic Test Accuracy Studies: The PRISMA-DTA Statement. JAMA. 2018 Jan 23;319(4):388-396. doi: 10.1001/jama.2017.19163.

For more information, visit: [www.prisma-statement.org](http://www.prisma-statement.org).



# BMJ Open

## The accuracy of the neutrophil to lymphocyte ratio for the diagnosis of neonatal sepsis: a systematic review and meta-analysis

|                                 |                                                                                                                                                                                                                                                                                                                                                                                                                                                                                                                                                              |
|---------------------------------|--------------------------------------------------------------------------------------------------------------------------------------------------------------------------------------------------------------------------------------------------------------------------------------------------------------------------------------------------------------------------------------------------------------------------------------------------------------------------------------------------------------------------------------------------------------|
| Journal:                        | <i>BMJ Open</i>                                                                                                                                                                                                                                                                                                                                                                                                                                                                                                                                              |
| Manuscript ID                   | bmjopen-2021-060391.R1                                                                                                                                                                                                                                                                                                                                                                                                                                                                                                                                       |
| Article Type:                   | Original research                                                                                                                                                                                                                                                                                                                                                                                                                                                                                                                                            |
| Date Submitted by the Author:   | 01-Aug-2022                                                                                                                                                                                                                                                                                                                                                                                                                                                                                                                                                  |
| Complete List of Authors:       | xin, yu; Harbin Medical University Cancer Hospital, Department of Critical Care Medicine<br>Shao, Yunshuang; Qilu Hospital of Shandong University Qingdao<br>Mu, Wenjing; Harbin Medical University Cancer Hospital, Department of Critical Care Medicine<br>Li, Hongxu; Harbin Medical University Cancer Hospital, Department of Critical Care Medicine<br>Zhou, Yuxin; Harbin Medical University Cancer Hospital, Department of Critical Care Medicine<br>Wang, Changsong; Harbin Medical University Cancer Hospital, Department of Critical Care Medicine |
| <b>Primary Subject Heading</b>: | Diagnostics                                                                                                                                                                                                                                                                                                                                                                                                                                                                                                                                                  |
| Secondary Subject Heading:      | Infectious diseases, Intensive care, Paediatrics                                                                                                                                                                                                                                                                                                                                                                                                                                                                                                             |
| Keywords:                       | INFECTIOUS DISEASES, NEONATOLOGY, Diagnostic microbiology < INFECTIOUS DISEASES                                                                                                                                                                                                                                                                                                                                                                                                                                                                              |
|                                 |                                                                                                                                                                                                                                                                                                                                                                                                                                                                                                                                                              |

SCHOLARONE™  
Manuscripts



I, the Submitting Author has the right to grant and does grant on behalf of all authors of the Work (as defined in the below author licence), an exclusive licence and/or a non-exclusive licence for contributions from authors who are: i) UK Crown employees; ii) where BMJ has agreed a CC-BY licence shall apply, and/or iii) in accordance with the terms applicable for US Federal Government officers or employees acting as part of their official duties; on a worldwide, perpetual, irrevocable, royalty-free basis to BMJ Publishing Group Ltd ("BMJ") its licensees and where the relevant Journal is co-owned by BMJ to the co-owners of the Journal, to publish the Work in this journal and any other BMJ products and to exploit all rights, as set out in our [licence](#).

The Submitting Author accepts and understands that any supply made under these terms is made by BMJ to the Submitting Author unless you are acting as an employee on behalf of your employer or a postgraduate student of an affiliated institution which is paying any applicable article publishing charge ("APC") for Open Access articles. Where the Submitting Author wishes to make the Work available on an Open Access basis (and intends to pay the relevant APC), the terms of reuse of such Open Access shall be governed by a Creative Commons licence – details of these licences and which [Creative Commons](#) licence will apply to this Work are set out in our licence referred to above.

Other than as permitted in any relevant BMJ Author's Self Archiving Policies, I confirm this Work has not been accepted for publication elsewhere, is not being considered for publication elsewhere and does not duplicate material already published. I confirm all authors consent to publication of this Work and authorise the granting of this licence.

1 **The accuracy of the neutrophil to lymphocyte ratio for the diagnosis of neonatal**  
2 **sepsis: a systematic review and meta-analysis**

3 Yu Xin<sup>1</sup>, Yunshuang Shao<sup>2</sup>, Wenjing Mu<sup>1</sup>, Hongxu Li<sup>1</sup>, Yuxin Zhou<sup>1</sup>, Changsong  
4 Wang<sup>1\*</sup>

5 1.Department of Critical Care Medicine, Harbin Medical University Cancer Hospital,  
6 No. 150 Haping Rd, Nangang District, Harbin 150081, China.

7 2.Department of Critical Care Medicine, QiLu Hospital of ShanDong University  
8 (QingDao), No. 758 Hefei Rd, Shibe District, Qingdao 266000, China.

9 \*Corresponding author:

10 Changsong Wang, MD E-mail: changsongwangicu@163.com

11 Department of Critical Care Medicine, Harbin Medical University Cancer Hospital.

12 No. 150 Haping Rd, Nangang District, Harbin 150081, China.

13

14 Yu Xin, MS. E-mail: xy15774634247@163.com

15 Yunshuang Shao, MS. E-mail: 13644535692@163.com

16 Wenjing Mu, MS. E-mail: m297932712@163.com

17 Hongxu Li, MS. E-mail: lihongxuicu@163.com

18 Yuxin Zhou, MS. E-mail: zhouyuxin77work@163.com

1  
2  
3  
4 19 **Abstract**

5  
6  
7 20 **Objectives:** The purpose of this study was systematically and quantitatively to assess  
8  
9 21 the value of the neutrophil to lymphocyte ratio (NLR) for the diagnosis of neonatal  
10  
11  
12 22 sepsis by systematic review and meta-analysis.

13  
14  
15 23 **Design:** Systematic review and meta-analysis.

16  
17  
18 24 **Methods:** Eight major databases, including The Cochrane, PubMed, Embase, Web of  
19  
20 25 Science, CNKI, Wanfang, China Biomedical Literature Database, and VIP Database,  
21  
22  
23 26 were systematically searched for neutrophil to lymphocyte ratio diagnoses of neonatal  
24  
25  
26 27 sepsis from inception to June 2022. Two investigators independently conducted the  
27  
28  
29 28 literature search, screening, data extraction. And quality evaluation with the  
30  
31  
32 29 QUADAS-2 checklist. Statistical analysis was performed using Review Manager 5.3,  
33  
34 30 Stata 16.0, and Meta-DISC1.4.

35  
36  
37 31 **Results:** A total of 14 studies comprising 1499 newborns were included in this meta-  
38  
39  
40 32 analysis. With a cut-off value ranging from 0.1 to 9.4, the pooled sensitivity of the  
41  
42  
43 33 neutrophil to lymphocyte ratio in the diagnosis of neonatal sepsis was 0.74 (95%  
44  
45 34 confidence interval [CI]: 0.61-0.83), the pooled specificity was 0.88 (95% CI 0.73-  
46  
47  
48 35 0.95), the positive likelihood ratio was 6.35(95% CI 2.6-15.47), the negative  
49  
50  
51 36 likelihood ratio was 0.30(95% CI 0.19-0.46), the diagnostic odds ratio was 21.27(95%  
52  
53  
54 37 CI 6.98-64.84), area under the curve (AUC) was 0.87(95% CI 0.84-0.89). In the  
55  
56  
57 38 subgroup analysis of early-onset neonatal sepsis, the pooled sensitivity was 0.75 (95%  
58  
59 39 CI 0.47-0.91), the pooled specificity was 0.99 (95% CI 0.88-1.00), the positive  
60

1  
2  
3  
4 40 likelihood ratio was 63.3 (95% CI 5.7-696.8), the negative likelihood ratio was 0.26  
5  
6  
7 41 (95% CI 0.10-0.63), the diagnostic odds ratio was 247(95% CI 16-3785), and the area  
8  
9  
10 42 under the curve (AUC) was 0.97 (95% CI 0.95-0.98).

11  
12 43 **Conclusions:** Our findings suggest that the neutrophil to lymphocyte ratio is a helpful  
13  
14  
15 44 indicator for the diagnosis of early neonatal sepsis, but it still needs to be combined  
16  
17  
18 45 with other laboratory tests and specific clinical manifestations.

19  
20 46 **Keywords:** Sepsis, Newborn, Neutrophil to lymphocyte ratio, Meta-analysis  
21  
22  
23 47

#### 24 25 26 48 **Strengths and limitations**

- 27  
28 49 ● We conducted a comprehensive search of each literature database and formulated  
29  
30  
31 50 detailed inclusion and ranking criteria to ensure the quantity and quality of the  
32  
33  
34 51 included literature.
- 35  
36 52 ● Subgroup analyses were performed according to sepsis type, study area, and cut-  
37  
38  
39 53 off value as described in the methodology section of this study.
- 40  
41 54 ● Our included articles lack more multicentre and large sample studies.
- 42  
43  
44 55 ● There may be other clinical and statistical heterogeneity in the included studies.  
45  
46  
47 56

#### 48 49 50 51 52 53 58 **Background**

54  
55  
56 59 Neonatal sepsis is a systemic inflammatory response syndrome caused by a bacterial  
57  
58  
59 60 infection in the neonatal stage. The clinical manifestations gradually surface in the  
60

1  
2  
3  
4 61 whole body of the inflammatory response and finally progress into organ failure,  
5  
6  
7 62 leading to death. [1] Studies have shown that the morbidity of neonatal sepsis is 1 - 20  
8  
9  
10 63 % in newborns and is also the third highest after premature delivery and neonatal  
11  
12 64 encephalopathy (perinatal asphyxia and trauma). [2] At present, neonatal sepsis is  
13  
14  
15 65 faced with insufficient diagnostic methods, resulting in the inability to guide clinical  
16  
17  
18 66 treatment in a timely manner, thereby affecting its therapeutic effect.  
19  
20  
21 67 According to a survey, the global mortality rate of neonatal sepsis reached 1.0% to  
22  
23  
24 68 5.0%. [3] Early and precise identification of neonatal sepsis is crucial for slowing the  
25  
26  
27 69 progression of the disease and decreasing mortality. [4] Notwithstanding, there are  
28  
29  
30 70 many clinical biomarkers in the clinic for the diagnosis of neonatal sepsis, and due to  
31  
32  
33 71 the long time consumption, low diagnostic performance, and the rapid progress of the  
34  
35  
36 72 disease, missed identification of neonatal sepsis delays diagnosis and treatment,  
37  
38  
39 73 increasing the risk of death. [5]  
40  
41  
42 74 The accurate identification of neonatal sepsis is critical to provide sufficient treatment  
43  
44  
45 75 time and improve clinical outcomes. In contrast, the NLR is an independent predictor  
46  
47  
48 76 in the clinic that has been widely used in various diseases, such as immune system  
49  
50  
51 77 diseases, tumours, and cancers. [6] Many studies have shown that the NLR is more  
52  
53  
54 78 reliable for diagnosing neonatal sepsis than neutrophil counts or lymphocyte counts  
55  
56  
57 79 alone. Nevertheless, there is still a dispute about diagnosing the effectiveness of  
58  
59  
60 80 neonatal sepsis. [7, 8]

1  
2  
3  
4 81 We assessed the accuracy as a biomarker for diagnosing neonatal sepsis in newborns  
5  
6  
7 82 by performing a systematic literature review and a meta-analysis, comparing the  
8  
9  
10 83 predictive value, and providing a reference for the clinical diagnosis of neonatal sepsis.  
11  
12  
13  
14

15

## 16 85 **Methods**

17  
18 86 The present meta-analysis was conducted and reported according to the Preferred  
19  
20 87 Reporting Items for Systematic Reviews and Meta-analyses Statement (PRISMA).  
21  
22

23 88 For details, see PRISMA-DTA for abstracts and PRISMA-DTA.  
24  
25

## 26 89 **Patient and Public Involvement**

27  
28 90 No patients were involved.  
29  
30

## 31 91 **Data source**

32  
33 92 We searched the Cochrane, PubMed, Embase, Web of Science, CNKI, Wanfang,  
34  
35  
36 93 China Biomedical Literature Database, and VIP Database for studies on the diagnostic  
37  
38  
39 94 accuracy of neonatal sepsis published before June 2022. We used a combination of  
40  
41  
42 95 subject words and free words to search the study and the following keywords:  
43  
44 96 "Neutrophil and lymphocyte ratio," "Infant," "Newborn," "Neonate," "sepsis,"  
45  
46  
47 97 "septicemia," "Neonatal Sepsis. "In addition, we checked the reference lists of each  
48  
49  
50 98 of the primary studies to identify additional publications. The retrieval format is shown  
51  
52  
53 99 in (Additional file 1).  
54

## 55 100 **Study eligibility**

56  
57  
58  
59  
60

1  
2  
3  
4 101 Inclusion criteria: (1). The purpose of the study was to evaluate or explore the  
5  
6  
7 102 diagnostic value of the neutrophil to lymphocyte ratio in neonatal sepsis. The case  
8  
9  
10 103 group included newborns with confirmed neonatal sepsis, and the control group  
11  
12 104 included newborns with neonates without sepsis. The diagnostic gold standard is  
13  
14  
15 105 blood culture (4). It can directly or indirectly obtain the true positive, false positive,  
16  
17  
18 106 true negative, and false negative values of the neutrophil-lymphocyte ratio in the  
19  
20 107 diagnosis of neonatal sepsis. The language is English or Chinese.

21  
22  
23 108 Exclusion criteria: (1) Being able to be extracted from the full text (2) Reviews,  
24  
25  
26 109 conference reports, individual cases, and animal experiments; (3) A duplicated study.

#### 27 28 110 **Data extraction and quality assessment**

29  
30  
31 111 Two authors(XY, SYS) independently conducted the literature screening, data  
32  
33  
34 112 extraction, and quality evaluation. In case of disagreement, the third author (MWJ)  
35  
36  
37 113 decided. extracted data from the included literature, including the year of publication,  
38  
39  
40 114 country of origin, study design, author, publication year, newborn birth situation,  
41  
42  
43 115 study location, sample size, case and control numbers, cut-off value, true positive  
44  
45  
46 116 value, false-positive value, false-negative value, true negative value, sensitivity, and  
47  
48  
49 117 specificity. We assess the quality of the Diagnostic Accuracy Studies-2 (QUADAS-2)  
50  
51  
52 118 checklist. We used Review Manager (version 5.3) for quality assessment.

#### 53 119 **Statistical analyses**

54  
55  
56 120 The heterogeneity of the included studies was evaluated by the Cochrane Q test and I<sup>2</sup>  
57  
58  
59 121 statistic. I<sup>2</sup> could be calculated from the Formula of  $I^2=100\% \times (Q - df)/Q$ . If I<sup>2</sup> was <50%



1  
2  
3  
4 122 or the  $p$  value was  $>0.1$ , a fixed effects model was used for pooling the data; whereas,  
5  
6  
7 123 if  $I^2$  was  $>50\%$  or the  $p$  value was  $<0.1$ , then there is more heterogeneity among studies,  
8  
9  
10 124 and a bivariate random effects model was used for pooling the data; if  $I^2$  was  $<50\%$  or  
11  
12 125 the  $p$  value was  $<0.1$ , a fixed effects model could be used; if  $I^2$  was  $>50\%$  or the  $p$  value  
13  
14  
15 126 was  $>0.1$ , a bivariate random effects model could be used. If there was heterogeneity  
16  
17  
18 127 between the studies, the source of the heterogeneity was further explored, and  
19  
20 128 threshold effect and nonthreshold effect analyses were carried out. Meta Disc1.4  
21  
22  
23 129 software was used to analyze the threshold effect heterogeneity. For heterogeneity  
24  
25  
26 130 caused by non-threshold effects, we performed meta-regression analysis and  
27  
28  
29 131 sensitivity analysis to find the source of heterogeneity. At the same time, we  
30  
31  
32 132 performed subgroup analyses by cut-off value, neonatal birth status, and type of sepsis  
33  
34  
35 133 to assess the stability of the results. The combined sensitivity, combined specificity,  
36  
37 134 combined diagnostic odds ratio (DOR), combined positive likelihood ratio ( $LR^+$ ),  
38  
39 135 combined negative likelihood ratio ( $LR^-$ ), and its 95% confidence interval (95% CI)  
40  
41  
42 136 were determined using Stata 16.0. Simultaneously, a combined receiver operating  
43  
44  
45 137 characteristic curve (SROC) fitting analysis was performed. All studies are presented  
46  
47  
48 138 as a circle and plotted with the SROC curve. The summary point is represented by a  
49  
50  
51 139 dot which was surrounded by a 95% confidence region. The area under the SROC  
52  
53  
54 140 curve was calculated. At the same time, we assessed the bias of included studies by  
55  
56 141 contour-enhanced funnel plots. If there was bias, we judged the stability of the results  
57  
58  
59  
60

1  
2  
3  
4 142 by the cut-and-fill method. We used Stata (version 16.0) and MetaDiSc (version 1.4)  
5  
6  
7 143 to perform the analyses.  
8

## 9 144 **Results**

### 12 145 **Identification of studies**

15 146 After checking duplicates and reading abstracts and excluding relevant literature  
16  
17 147 according to the exclusion criteria, a final total of 14 studies were used for the current  
18  
19  
20 148 meta-analysis. [9-22] The specific process is shown in Fig 1. Of these, 783 neonates  
21  
22  
23 149 in the sepsis group and 716 neonates in the nonsepsis group were studied and evaluated.  
24  
25  
26 150 (Additional file 2) shows the significant characteristics of the selected studies. The  
27  
28  
29 151 baseline information included the following parameters: the number of patients,  
30  
31  
32 152 gestational age, regions, types of sepsis, disease diagnosis methods, study design, and  
33  
34 153 NLR cut-off value.  
35

### 36 154 **Quality of studies**

39 155 We imported the literature into Review Manager 5.3 and used the QUADAS-2 tool to  
40  
41  
42 156 evaluate the quality of the 14 included references. According to the methodological  
43  
44  
45 157 evaluation results, the gold standard for the diagnosis of all patients is blood culture.  
46  
47  
48 158 For patient selection, three references were considered high risk. Since most studies  
49  
50  
51 159 do not specify a threshold in advance, there may be a risk of bias. Most articles did  
52  
53  
54 160 not mention whether the interpretation of the experimental results to be evaluated was  
55  
56  
57 161 performed without knowing the results of the gold standard, indicating that it is not  
58  
59 162 clear whether the interpretation of the results will produce a risk of bias. (Figs. 2, 3)  
60

### 163 **Heterogeneity exploration**

164 Since the heterogeneity of diagnostic meta-analysis is widespread, it is mainly  
165 composed of threshold effect heterogeneity and nonthreshold effect heterogeneity.

166 Through the combination of data, we found that the sensitivity and specificity of  $I^2$   
167 were 91.62% and 92.54%, respectively. This indicates that there is considerable  
168 heterogeneity. We first conducted a threshold effect test. By using metadisc1.4, we  
169 found that the Spearman correlation coefficient was -0.037 ( $p= 0.899$ ) ( $p>0.05$ ). It  
170 shows no threshold effect heterogeneity, so to further find the source of heterogeneity,  
171 we carried out meta-regression and sensitivity analysis. In the meta-regression  
172 analysis, we used the publication year (with 2019 as the cut-off), region, study type,  
173 and neonatal birth status as variables for analysis. The meta-regression results show  
174 that articles in prospective studies are the main source of heterogeneity( $p=0.01$ )  
175 (Additional file 3). Sensitivity analysis removes non-Asian, preterm, and late-onset  
176 sepsis research results and shows that the region is the main source of heterogeneity.  
177 (Additional file 4).

### 178 **Data synthesis and Subgroup analysis**

179 With a cut-off value ranging from 0.1 to 9.4, the pooled sensitivity and specificity of  
180 the NLR in the diagnosis of neonates were 0.74 (95% CI 0.61-0.83) and 0.88 (95% CI  
181 0.73-0.95), respectively;  $LR^+$  was 6.35 (95% CI 2.5-15.47),  $LR^-$  was 0.30 (95% CI  
182 0.19-0.46), DOR was 21.27 (95% CI 6.98-64.84), and area under the curve (AUC)  
183 was 0.87 (95% CI 0.84-0.89) (Figs. 4, 5, 6, 7).

1  
2  
3  
4 184 The results of the EOS subgroup analysis showed that the pooled sensitivity and  
5  
6  
7 185 specificity of the NLR in the diagnosis of neonatal sepsis were 0.75 (95% CI 0.47-  
8  
9  
10 186 0.91) and 0.99 (95% CI 0.88-1.00); LR<sup>+</sup> was 63.3 (95% CI 5.7-696.8), LR<sup>-</sup> was 0.26  
11  
12 187 (95% CI 0.10-0.63), DOR was 247 (95% CI 16-3785), and the area under the curve  
13  
14  
15 188 (AUC) was 0.97 (95% CI 0.95-0.98). The results of the LOS subgroup analysis  
16  
17  
18 189 showed that the pooled sensitivity and specificity of the NLR in the diagnosis of  
19  
20  
21 190 neonatal sepsis were 0.60 (95% CI 0.53-0.67) and 0.85 (95% CI 0.80-0.90); LR<sup>+</sup> was  
22  
23 191 3.71 (95% CI 2.73-5.02), LR<sup>-</sup> was 0.41 (95% CI 0.08-1.94), DOR was 11.14 (95% CI  
24  
25  
26 192 6.54-18.98), and the area under the curve (AUC) was 0.85. Cut-off value: 0-2, pooled  
27  
28  
29 193 sensitivity and specificity were 0.74(95% CI 0.69-0.78) and 0.90(95% CI 0.71-0.97),  
30  
31  
32 194 respectively; LR<sup>+</sup> was 7.1(95% CI 2.3-21.8), LR<sup>-</sup> was 0.29(95% CI 0.23-0.36), DOR  
33  
34 195 was 25 (95% CI 7-88), the area under the curve (AUC) was 0.77. Cut-off value: 2-4,  
35  
36  
37 196 pooled sensitivity and specificity were 0.79(95% CI 0.72-0.85) and 0.62(95% CI 0.54-  
38  
39  
40 197 0.70); LR<sup>+</sup> was 2.21(95% CI 1.24-3.92), LR<sup>-</sup> was 0.33(95% CI 0.23-0.46), DOR was  
41  
42 198 6.73(95% CI 2.81-16.14) The area under the curve (AUC) was 0.85. Cut-off value: >4,  
43  
44  
45 199 pooled sensitivity and specificity were 0.60(95% CI 0.53-0.67) and 0.91(95% CI 0.85-  
46  
47  
48 200 0.95); LR<sup>+</sup> was 9.0(95% CI 0.3-270.24), LR<sup>-</sup> was 0.29(95% CI 0.03-2.68), DOR was  
49  
50  
51 201 31.51(95% CI 0.81-1229.29) The area under the curve (AUC) was 0.95.(Additional  
52  
53 202 file 5)

### 203 **Publication bias exploration**

1  
2  
3  
4 204 The contour-enhanced funnel plot results suggested that there was publication bias,  
5  
6  
7 205 and after our cut-and-fill method, the results showed that the stability of our meta-  
8  
9  
10 206 analysis results was not affected.. (Fig. 8)

## 11 12 207 **Discussion**

13  
14  
15 208 The early identification of neonatal sepsis remains challenging in the clinic, and the  
16  
17  
18 209 NLR is broadly used in diagnosing immune system diseases, tumours, and cancers.  
19  
20  
21 210 However, the accurate diagnosis of neonatal sepsis is still questionable. [23,24,25] For  
22  
23  
24 211 the first time, we conducted a meta-analysis and systematic review of the diagnostic  
25  
26  
27 212 performance of NLR in neonatal sepsis, which may provide a better reference value  
28  
29  
30 213 for the early diagnosis of neonatal sepsis and for NLR to diagnose neonatal sepsis,  
31  
32  
33 214 providing evidence-based evidence.. The meta-analysis included all 14 studies from 7  
34  
35  
36 215 nations, including 1499 patients with neonatal sepsis. Moreover, the results revealed  
37  
38  
39 216 that the combined AUC of the NLR in the diagnosis of neonatal sepsis was 0.874 (95%  
40  
41  
42 217 CI=0.84, 0.89), showing that the NLR is a helpful indicator for the diagnosis of early  
43  
44  
45 218 neonatal sepsis.

46  
47  
48 219 Omran A et al. found that NLR is closely related to neonatal sepsis. Within a few  
49  
50  
51 220 hours after neonatal sepsis, NLR can rapidly increase in a short time compared to CRP.  
52  
53  
54 221 The use of NLR makes it possible to identify neonatal sepsis early [26] can be used as  
55  
56  
57 222 an auxiliary diagnostic index for the diagnosis of neonatal sepsis, [27] timely diagnosis  
58  
59  
60 223 and early appropriate antibiotic treatment. Seymour CW et al. showed that in the ROC  
224 curve analysis of bacterial sepsis according to the Sepsis-2 standard, NLR showed a

1  
2  
3  
4 225 moderate AUC (0.68), which was significantly higher than that of CRP, lactate and  
5  
6  
7 226 PCT, [28, 29] suggesting that NLR has better diagnostic performance. Mahmoud  
8  
9  
10 227 NMSA et al. found that when the cut-off value was 0.1, NLR showed the best  
11  
12 228 specificity and negative predictive value for neonatal sepsis (SPE was 99%, NPV was  
13  
14  
15 229 75%), compared with CRP and PCT, NLR showed higher specificity with better  
16  
17  
18 230 diagnostic power. [18] A study by Alkan Ozdemir S et al. in the diagnosis of late-  
19  
20 231 onset neonatal sepsis showed that NLR had a high sensitivity, specificity, and  
21  
22  
23 232 accuracy of 0.73, 0.78, and 0.76 respectively, with an NLR cut-off value of 1.77.[10]  
24  
25  
26 233 In the study of Goldberg O, it was found that the cut-off value of NLR was 1.5, and  
27  
28 234 NLR could be used as a single laboratory index to diagnose neonatal sepsis, [12]  
29  
30  
31 235 indicating that NLR could be a valuable indicator to exclude neonatal sepsis.  
32  
33  
34 236 Subgroup analysis indicated that pooled sensitivity and specificity were higher for  
35  
36  
37 237 detecting the NLR in a group of early-onset neonatal sepsis. The results express the  
38  
39  
40 238 stability of the results. Neonatal early-onset sepsis mainly emphasizes that the bacteria  
41  
42  
43 239 originate from intrauterine tissue and during delivery, and the spectrum of pathogenic  
44  
45  
46 240 bacteria is relatively concentrated. [30, 31] Streptococcus B and Escherichia coli are  
47  
48  
49 241 the most common pathogens of early-onset neonatal sepsis. In the future, more  
50  
51  
52 242 research can be incorporated to further verify the accuracy of the NLR diagnosis of  
53  
54  
55 243 early-onset sepsis.  
56  
57  
58 244 Our study included homogeneous research as much as possible, but the included  
59  
60 245 studies still had heterogeneity in which nonthreshold effects can be explained to partial

1  
2  
3  
4 246 heterogeneity. The results of the meta-regression analysis indicated that the study type  
5  
6  
7 247 may be the main sources of heterogeneity. (Additional file 3). The sensitive analysis  
8  
9  
10 248 results also indicate that the non-Asian region is the primary source of heterogeneity  
11  
12 249 (Additional file 4). However, after removing all non-Asian articles, heterogeneity still  
13  
14  
15 250 existed, indicating this study's heterogeneity is for other reasons.

16  
17 251 In addition, several limitations of this study should be noted. (1). Although it is  
18  
19  
20 252 homogeneous to reduce the choice of bias applications, heterogeneity is still in the  
21  
22  
23 253 inclusive research. (2). The diagnosis of newborns will also have differences due to  
24  
25  
26 254 different researchers, resulting in false positive and false negative results for the  
27  
28  
29 255 diagnosis of neonatal sepsis, which leads to bias. (3). A part of the included research  
30  
31 256 was a retrospective study, so there may be a selection of research objects. (4). The  
32  
33  
34 257 included research comes from different countries, and newborns have different  
35  
36  
37 258 immunity for different races and sexes. Therefore, it is necessary to carry out the same  
38  
39  
40 259 race, large sample, multicentre prospective clinical study to determine value of the  
41  
42 260 NLR in diagnosing neonatal sepsis in the future.

43  
44  
45 261

## 46 47 262 **Conclusion**

48  
49  
50  
51 263 In summary, our findings suggest that the neutrophil to lymphocyte ratio is a helpful  
52  
53  
54 264 indicator for the diagnosis of early neonatal sepsis, but it still needs to be combined  
55  
56  
57 265 with other laboratory tests and specific clinical manifestations. However, it is limited  
58  
59  
60 266 to the research site and research type. Further research is needed to carry out

1  
2  
3  
4 267 multicentre prospective studies with multiple samples to verify the accuracy of  
5  
6  
7 268 neutrophil to lymphocyte ratio (NLR) diagnosis and improve neonatal sepsis  
8  
9  
10 269 prognosis.

11  
12  
13 270

### 14 15 271 **Abbreviations**

16  
17  
18 272 NLR: neutrophil to lymphocyte ratio; QUADAS-2: Quality Assessment of Diagnostic  
19  
20  
21 273 Accuracy Studies-2; CI: confidence interval; SEN: sensitivity; SPE: specificity; LR:  
22  
23  
24 274 negative likelihood ratio; LR<sup>+</sup>: positive likelihood ratio; DOR: diagnostic odds ratio;  
25  
26  
27 275 TP: true positive; FP: false positive; TN: true negative; FN: false negative; EOS: early-  
28  
29  
30 276 onset sepsis; LOS: late-onset sepsis; AUC: area under the curve; SROC: summary  
31  
32 277 receiver operating characteristic.

### 33 34 278 **Contributors**

35  
36  
37 279 XY wrote the manuscript. LHX, ZYX, and MWJ performed the literature review. XY  
38  
39  
40 280 and SYS performed the statistical analysis. MWJ and WCS revised the text. All  
41  
42  
43 281 authors read and approved the final manuscript.

### 44 45 282 **Author Details**

46  
47  
48 283 1. Department of Critical Care Medicine, Harbin Medical University Cancer Hospital,  
49  
50  
51 284 No. 150 Haping Rd., Nangang District, Harbin 150081, China.

52  
53  
54 285 2. Department of Critical Care Medicine, QiLu Hospital Of ShanDong University  
55  
56  
57 286 (QingDao), No. 758 Hefei Rd, Shibe District, Qingdao 266000, China.



1  
2  
3  
4 287 **Acknowledgments:** Not applicable.  
5

6  
7 288 **Competing interests:** The authors declare that they have no competing interests.  
8

9  
10 289 **Availability of data and materials:** No data are available.  
11

12 290 **Consent for publication:** Not applicable.  
13

14  
15 291 **Ethics approval and consent to participate:** Not applicable.  
16

17 292 **Funding:** None.  
18

19  
20 293  
21

22  
23 294 **Reference**  
24

25  
26 295 [1] Du Lizhong.Challenges in diagnosis and prevention of neonatal sepsis, *Chin J*  
27  
28 296 *Pediatr*,2019 ; 57(04): p. 241-243.  
29

30  
31 297 [2] Global, regional, and national life expectancy, all-cause mortality, and cause-  
32  
33 298 specific mortality for 249 causes of death, 1980-2015: a systematic analysis for the  
34  
35 299 Global Burden of Disease Study 2015. *Lancet*, 2016. 388(10053): p. 1459-1544.  
36  
37

38  
39 300 [3] Oza, S.Neonatal cause-of-death estimates for the early and late neonatal periods  
40  
41 301 for 194 countries: 2000-2013. *Bull World Health Organ*, 2015. 93(1): p. 19-28.  
42  
43

44  
45 302 [4] Brodska, H.Diagnostic and prognostic value of presepsin vs. established  
46  
47 303 biomarkers in critically ill patients with sepsis or systemic inflammatory response  
48  
49 304 syndrome. *Clinical Chemistry and Laboratory Medicine (CCLM)*, 2018. 56(4): p. 658-  
50  
51 305 668.  
52

53  
54  
55 306 [5] Li wei.Expert consensus on the diagnosis and management of neonatal sepsis  
56  
57 307 (version 2019),*Chin J Pediatr*,2019.57(4):p.252-257.  
58  
59  
60

- 1  
2  
3  
4 308 [6] Gong W, Yang S, Yang X, et al. Blood preoperative neutrophil-to-lymphocyte ratio  
5  
6  
7 309 is correlated with TNM stage in patients with papillary thyroid cancer[J]. *Clinics*, 2016,  
8  
9  
10 310 71(6):311-314.
- 11  
12 311 [7] Kumarasamy C, Sabarimurugan S, Madurantakam R M, et al. Prognostic  
13  
14  
15 312 significance of blood inflammatory biomarkers NLR, PLR, and LMR in cancer—A  
16  
17  
18 313 protocol for systematic review and meta-analysis[J]. *Medicine*, 2019, 98(24): e14834.
- 19  
20 314 [8] Mariaelena C, Diana G, Domenico M, et al. Baseline neutrophil-to-lymphocyte  
21  
22  
23 315 ratio (NLR) and derived NLR could predict overall survival in patients with advanced  
24  
25  
26 316 melanoma treated with nivolumab[J]. *Journal for Immunotherapy of Cancer*, 2018,  
27  
28  
29 317 6(1):74.
- 30  
31 318 [9] Ruslie R H, Tjipta D G, Samosir C T, et al. Bacterial pattern, and role of  
32  
33  
34 319 laboratory parameters as marker for neonatal sepsis[C]//IOP Conference Series:  
35  
36  
37 320 Earth and Environmental Science. *IOP Publishing*, 2018, 125(1): 012057.
- 38  
39 321 [10] Alkan Ozdemir S, S, Arun Ozer E, Ilhan O, et al. Can neutrophil to lymphocyte  
40  
41  
42 322 ratio predict late-onset sepsis in preterm infants?[infants? [J]. *Journal of Clinical*  
43  
44  
45 323 *Laboratory Analysis*, 2017:e22338.
- 46  
47 324 [11] Goldberg O, Amitai N, Chodick G, et al. Can we improve early identification of  
48  
49  
50 325 neonatal late-onset sepsis? A validated prediction model[J]. *Journal of Perinatology*,  
51  
52  
53 326 2020, 40(9): p. 1315-1322.
- 54  
55 327 [12] Wilar R. Diagnostic value of eosinopenia and neutrophil to lymphocyte ratio on  
56  
57  
58 328 early onset neonatal sepsis[J]. *Korean Journal of Pediatrics*, 2018, 62(6): p. 217-223.  
59  
60

- 1  
2  
3  
4 329 [13] Sumitro KR, Utomo MT, WidodoA. Neutrophil-to-Lymphocyte Ratio as an  
5  
6 330 Alternative Marker of Neonatal Sepsis in Developing Countries[J]. *Oman Medical*  
7  
8  
9 331 *Journal*, 2021, 36(1):e214-e214.  
10  
11  
12 332 [14] Du xiaoyu,Ai liang. Changes and clinical significance of NLR, CRP and PCT in  
13  
14  
15 333 neonates with sepsis. *Experimental and Laboratory Medicine*,2019.37(01): p.110-112.  
16  
17  
18 334 [15] Zhang, S.J. Platelet-to-Lymphocyte and Neutrophil-to-Lymphocyte Ratio as  
19  
20 335 Predictive Biomarkers for Early-onset Neonatal Sepsis. *Jcsp-Journal of the College*  
21  
22 336 *of Physicians and Surgeons Pakistan*, 2021. 31(7): p. 821-824.  
23  
24  
25 337 [16] Panda S K, Nayak M K, Rath S, et al. The Utility of the Neutrophil-Lymphocyte  
26  
27 338 Ratio as an Early Diagnostic Marker in Neonatal Sepsis[J]. *Cureus*, 2021, 13(1):  
28  
29 339 e12891.  
30  
31  
32  
33 340 [17] E.C, H.S,C.C,et al. The Value of Neutrophil to Lymphocyte Ratio and Platelet  
34  
35 341 to Lymphocyte Ratio for Detecting Early-onset Neonatal Sepsis. *Journal of pediatric*  
36  
37 342 *hematology/oncology*, 2018. 40(4) E229-E232.  
38  
39  
40  
41 343 [18] Mahmoud N M S A, Baheeg G, Abdelhakeem M, et al. Platelet to Lymphocyte  
42  
43 344 Ratio and Neutrophil to Lymphocyte Ratio as New Diagnostic Markers for Detection  
44  
45 345 of Early-onset Neonatal Sepsis in Full-term Newborns. 2019.  
46  
47  
48  
49 346 [19] Mira S M, Alkhalegy H A, Abd-Elraheem S I, et al. Neutrophil and Platelet to  
50  
51 347 Lymphocyte Ratio for Detecting Early-onset Neonatal Sepsis[J]. *International*  
52  
53 348 *Journal of Medical Arts*, 2021, 3(2): 1274-1281.  
54  
55  
56  
57  
58  
59  
60

- 1  
2  
3  
4 349 [20] Varal I,Dogan P. Can neutrophil-lymphocyte ratio be a predictor of late-onset  
5  
6  
7 350 sepsis in preterm infants? [J]. *Annals of Medical Research*, 2020, 27(1):23.  
8  
9  
10 351 [21] Lim, H.Sukmawati.M, Artana.W. D,et al. Validity of neutrophil lymphocyte  
11  
12 352 count ratio in neonatal sepsis. *International Journal of Health Sciences*, (2021).5(2),  
13  
14  
15 353 53-61.  
16  
17 354 [22] Kurt A, Tosun MS, Altuntaş N: Diagnostic accuracy of complete blood cell count  
18  
19 355 and neutrophil-to-lymphocyte, lymphocyte-to-monocyte, and platelet-to-lymphocyte  
20  
21 356 ratios for neonatal infection. *Asian Biomedicine* 2022, 16(1):43-52.  
22  
23  
24  
25 357 [23] Bakhuizen, S.E.Meta -analysis shows that infants who have suffered neonatal  
26  
27 358 sepsis face an increased risk of mortality and severe complications. *Acta Paediatrica*,  
28  
29 359 2014. 103(12): p. 1211-1218.  
30  
31  
32  
33 360 [24] Shabuj K H, Hossain J, Moni S C, et al.C-reactive protein (CRP) as a single  
34  
35 361 biomarker for diagnosis of neonatal sepsis: a comprehensive meta-analysis.  
36  
37 362 *Mymensingh Med J*, 2017. 26(2): p. 364-371.  
38  
39  
40  
41 363 [25] Rich é, F. Reversal of neutrophil-to-lymphocyte count ratio in early versus late  
42  
43 364 death from septic shock. *Critical Care*, 2015. 19(1): p. 1-10.  
44  
45  
46  
47 365 [26] Makkar M, Gupta C, Pathak R et al. Performance evaluation of hematologic  
48  
49 366 scoring system in early diagnosis of neonatal sepsis. *J Clin Neonatol*. 2013;2:25–9.  
50  
51  
52  
53 367 [27] Omran A, Maarroof A, Saleh MH et al. Salivary C-reactive protein, mean platelet  
54  
55 368 volume and neutrophil lymphocyte ratio as diagnostic markers for neonatal sepsis. *J*  
56  
57 369 *Pediatr*.2018;94:82–7.  
58  
59  
60

- 1  
2  
3  
4 370 [28] Seymour CW, Gesten F, Prescott HC et al. Time to Treatment and Mortality  
5  
6  
7 371 during Mandated Emergency Care for Sepsis. *N Engl J Med*. 2017; 376(23):2235–44.  
8  
9  
10 372 [29] Ljungström L, Pernestig AK, Jacobsson Get al. Diagnostic accuracy of  
11  
12  
13 373 procalcitonin, neutrophil-lymphocyte count ratio, C-reactive protein, and lactate in  
14  
15  
16 374 patients with suspected bacterial sepsis. *PLoS One*. 2017 Jul 20;12(7): e0181704.  
17  
18  
19 375 [30] Stoll B J, Hansen N I, Higgins R D, et al. Very low birth weight preterm infants  
20  
21  
22 376 with early onset neonatal sepsis: the predominance of gram-negative infections  
23  
24  
25 377 continues in the National Institute of Child Health and Human Development Neonatal  
26  
27  
28 378 Research Network, 2002–2003. *The Pediatric infectious disease journal*, 2005. 24(7):  
29  
30 379 p. 635-639.  
31  
32  
33 380 [31] McIntire. D.D, K.J. Leveno. Neonatal mortality and morbidity rates in late preterm  
34  
35  
36 381 births compared with births at term. *Obstetrics & Gynecology*, 2008. 111(1): p. 35-41.  
37  
38  
39  
40  
41  
42  
43  
44  
45

46 385 **Figure legends:**

- 47  
48  
49 386 Figure 1: Flowchart of study selection, inclusion, and exclusion for the meta-analysis  
50  
51  
52 387 Figure 2: Risk of bias and applicability concerns summary  
53  
54  
55 388 Figure 3: Risk of bias and applicability concerns graph  
56  
57  
58 389 Figure 4: Forest plot of the pooled sensitivity and specificity  
59  
60 390 Figure 5: Forest plot of the pooled diagnostic odds ratio

1  
2  
3  
4 391 Figure 6: Forest plot of the pooled positive LR and negative LR  
5

6  
7 392 Figure 7: SROC of the neutrophil to lymphocyte ratio for the diagnosis of sepsis  
8

9 393 Figure 8: Contour-enhanced funnel plot of studies included in the meta-analysis  
10  
11

12 394  
13  
14

15 395 **Additional file legends:**  
16

17 396 Additional file 1: Detailed literature search strategy  
18

19  
20 397 Additional file 2: Characteristics of the included 14 studies  
21

22  
23 398 Additional file 3: The result of meta-regression.  
24

25 399 Additional file 4: The results of sensitivity analysis.  
26

27  
28 400 Additional file 5: Subgroup analysis of neutrophil-to-lymphocyte ratio in the diagnosis  
29

30  
31 401 of neonatal sepsis  
32  
33  
34  
35  
36  
37  
38  
39  
40  
41  
42  
43  
44  
45  
46  
47  
48  
49  
50  
51  
52  
53  
54  
55  
56  
57  
58  
59  
60

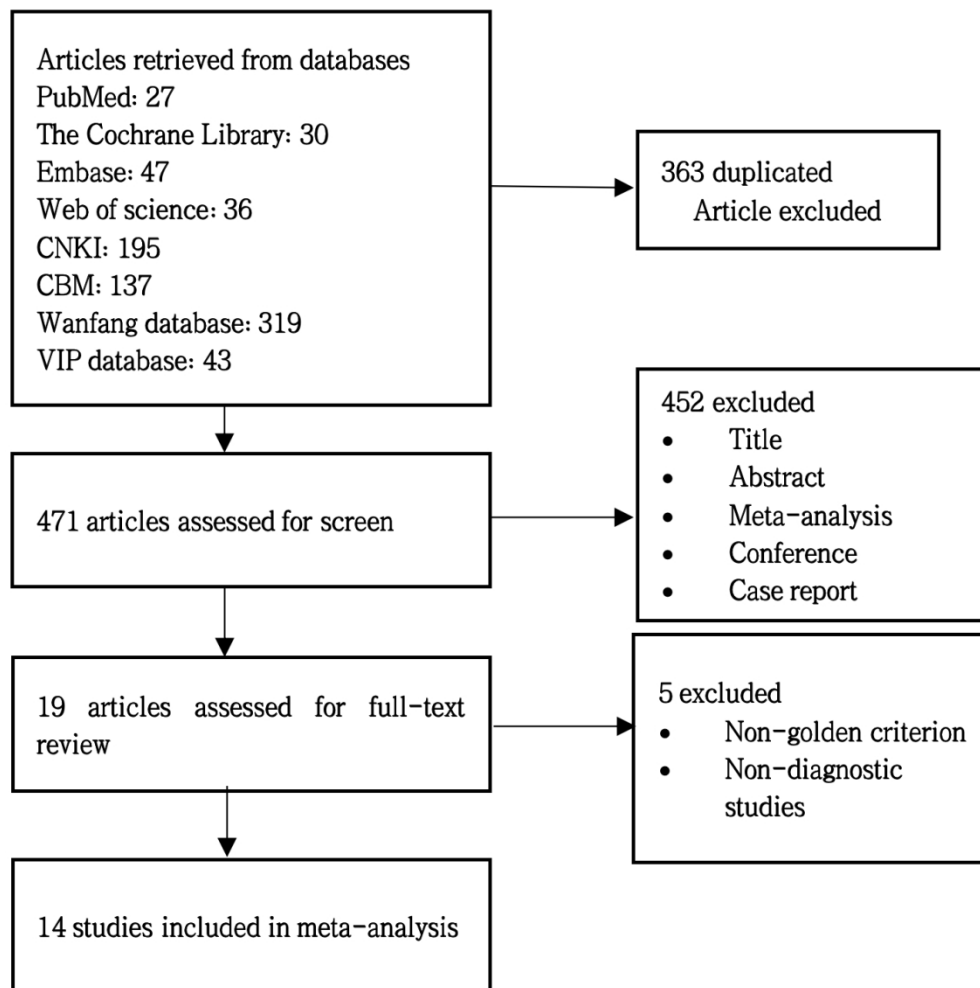

Flowchart of study selection, inclusion, and exclusion for the meta-analysis

254x253mm (144 x 144 DPI)

|                            | <u>Risk of Bias</u> |            |                    |                 | <u>Applicability Concerns</u> |            |                    |
|----------------------------|---------------------|------------|--------------------|-----------------|-------------------------------|------------|--------------------|
|                            | Patient Selection   | Index Test | Reference Standard | Flow and Timing | Patient Selection             | Index Test | Reference Standard |
| Abdullah Kurt 2022         | +                   | +          | ?                  | +               | +                             | +          | +                  |
| Emrah Can, MD2017          | +                   | +          | ?                  | +               | +                             | +          | +                  |
| Heriyanto Lim2021          | +                   | -          | ?                  | +               | +                             | +          | +                  |
| Ipek Guney Varal2020       | +                   | -          | +                  | +               | +                             | +          | +                  |
| Khadijah Rizky Sumitro2021 | -                   | -          | ?                  | +               | +                             | +          | +                  |
| Nagwa Mohamed,SAM2020      | +                   | -          | +                  | +               | +                             | +          | +                  |
| Ori Goldberg2020           | +                   | -          | ?                  | +               | +                             | +          | +                  |
| R H Ruslie2018             | -                   | -          | ?                  | +               | +                             | +          | +                  |
| Rocky Wilar, MD2018        | +                   | -          | ?                  | +               | +                             | +          | +                  |
| Santosh K. Panda2021       | +                   | +          | ?                  | +               | +                             | +          | +                  |
| Sara Mohamed Mira2021      | +                   | -          | ?                  | +               | +                             | +          | +                  |
| Senem Alkan Ozdemir2017    | -                   | -          | ?                  | +               | +                             | +          | +                  |
| Shujian Zhang 2021         | +                   | -          | ?                  | +               | +                             | +          | ?                  |
| Xiaoyu Du2019              | +                   | -          | ?                  | -               | +                             | ?          | ?                  |

High
 Unclear
 Low

Risk of bias and applicability concerns summary

228x309mm (144 x 144 DPI)



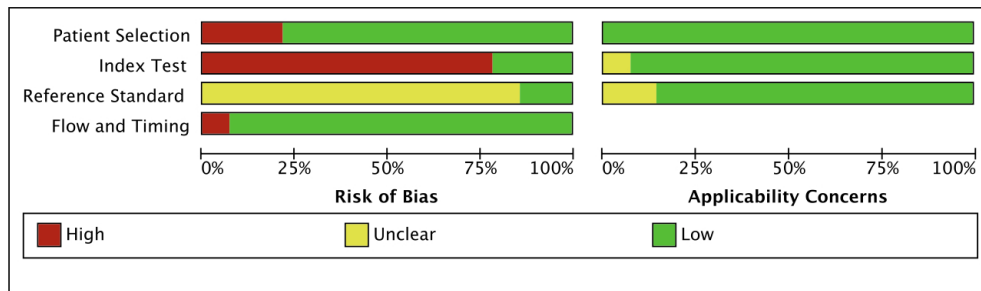

Risk of bias and applicability concerns graph

229x70mm (144 x 144 DPI)

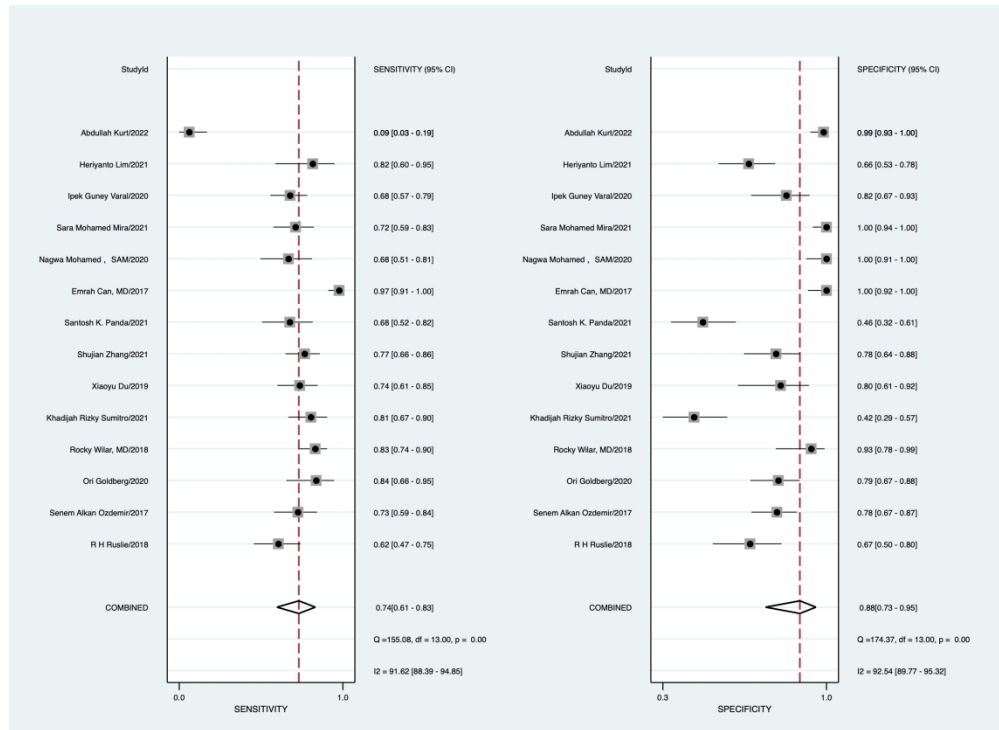

Forest plot of the pooled sensitivity and specificity

445x323mm (144 x 144 DPI)

1  
2  
3  
4  
5  
6  
7  
8  
9  
10  
11  
12  
13  
14  
15  
16  
17  
18  
19  
20  
21  
22  
23  
24  
25  
26  
27  
28  
29  
30  
31  
32  
33  
34  
35  
36  
37  
38  
39  
40  
41  
42  
43  
44  
45  
46  
47  
48  
49  
50  
51  
52  
53  
54  
55  
56  
57  
58  
59  
60

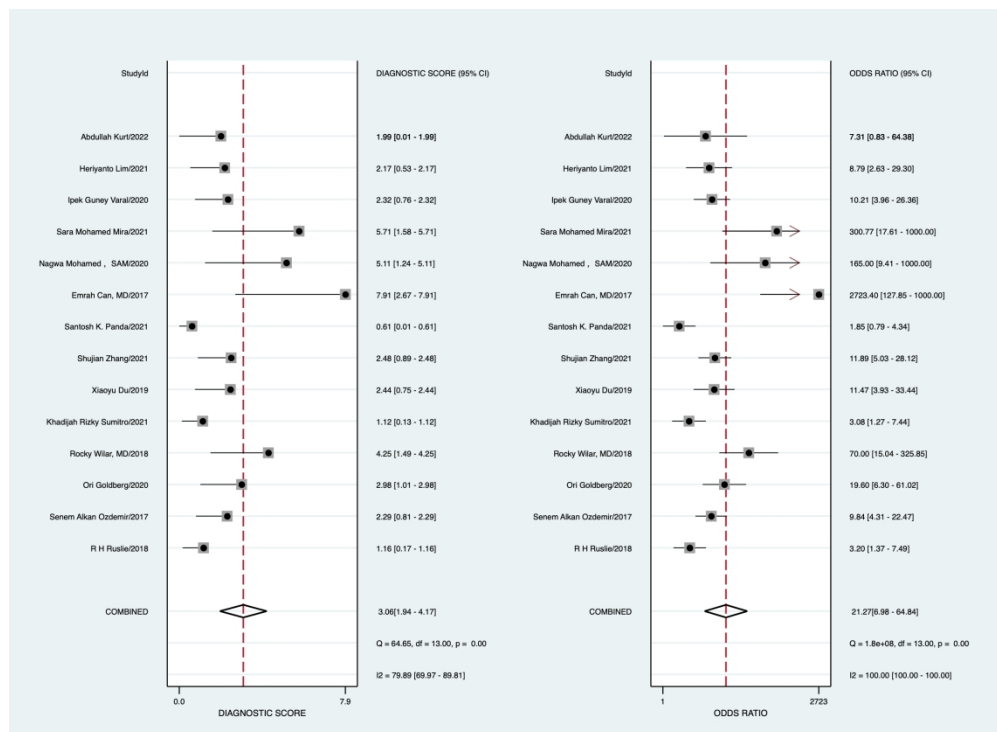

Forest plot of the pooled diagnostic odds ratio

445x323mm (144 x 144 DPI)

1  
2  
3  
4  
5  
6  
7  
8  
9  
10  
11  
12  
13  
14  
15  
16  
17  
18  
19  
20  
21  
22  
23  
24  
25  
26  
27  
28  
29  
30  
31  
32  
33  
34  
35  
36  
37  
38  
39  
40  
41  
42  
43  
44  
45  
46  
47  
48  
49  
50  
51  
52  
53  
54  
55  
56  
57  
58  
59  
60

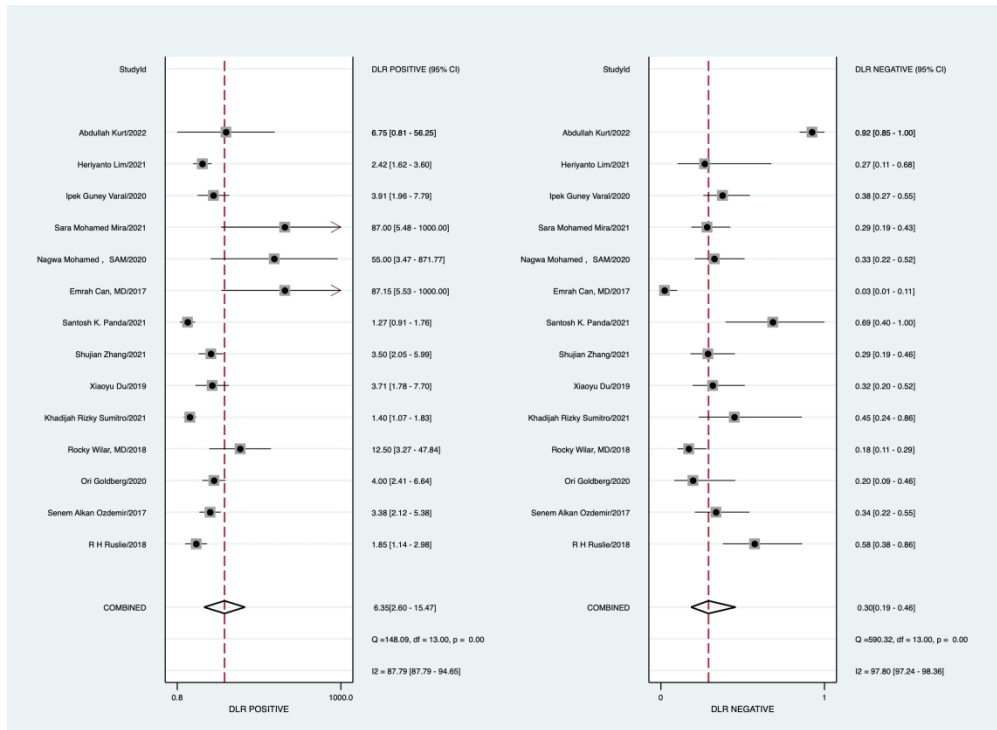

Forest plot of the pooled positive LR and negative LR

445x323mm (144 x 144 DPI)

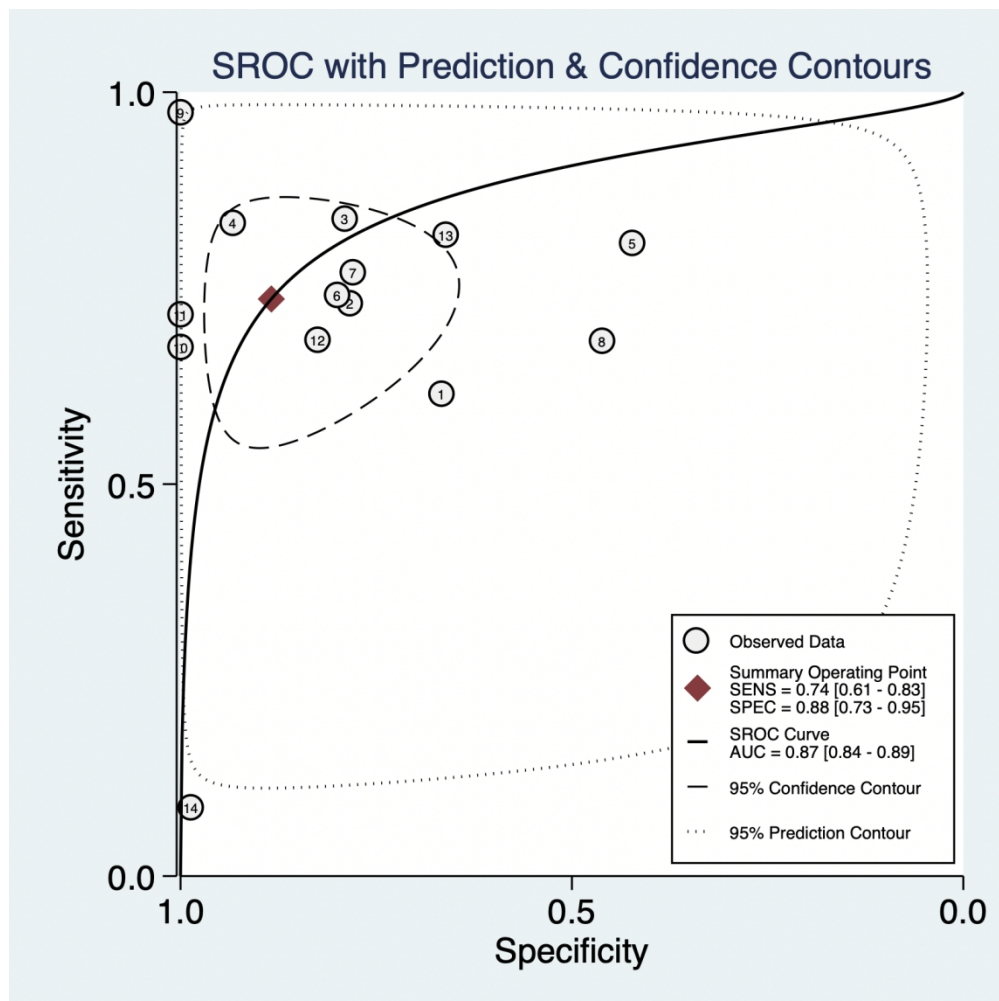

SROC of the neutrophil to lymphocyte ratio for the diagnosis of sepsis

288x287mm (144 x 144 DPI)

1  
2  
3  
4  
5  
6  
7  
8  
9  
10  
11  
12  
13  
14  
15  
16  
17  
18  
19  
20  
21  
22  
23  
24  
25  
26  
27  
28  
29  
30  
31  
32  
33  
34  
35  
36  
37  
38  
39  
40  
41  
42  
43  
44  
45  
46  
47  
48  
49  
50  
51  
52  
53  
54  
55  
56  
57  
58  
59  
60

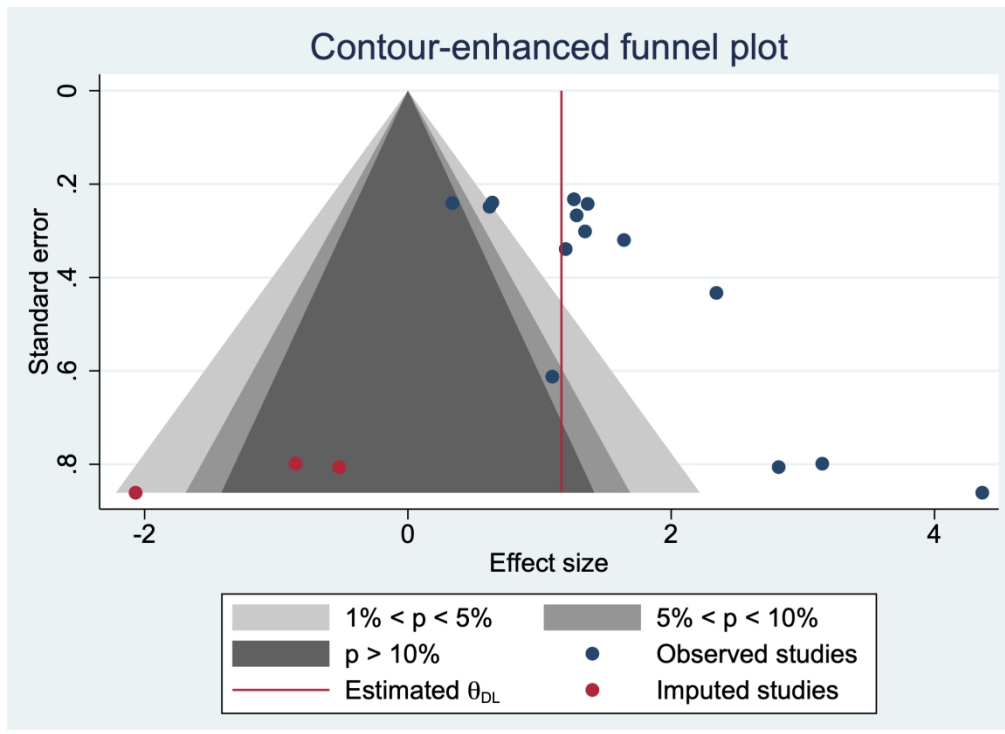

Contour-enhanced funnel plot of studies included in the meta-analysis

404x292mm (144 x 144 DPI)

## Detailed retrieval strategy

|                       |                                                                                                                                                                                                                                                                                                                                                                                                                                                                                                                                                                                                                                                                                                                                                                                                                                                                                                                   |
|-----------------------|-------------------------------------------------------------------------------------------------------------------------------------------------------------------------------------------------------------------------------------------------------------------------------------------------------------------------------------------------------------------------------------------------------------------------------------------------------------------------------------------------------------------------------------------------------------------------------------------------------------------------------------------------------------------------------------------------------------------------------------------------------------------------------------------------------------------------------------------------------------------------------------------------------------------|
| <b>Database</b>       | Pubmed                                                                                                                                                                                                                                                                                                                                                                                                                                                                                                                                                                                                                                                                                                                                                                                                                                                                                                            |
| <b>Website</b>        | https://pubmed.ncbi.nlm.nih.gov                                                                                                                                                                                                                                                                                                                                                                                                                                                                                                                                                                                                                                                                                                                                                                                                                                                                                   |
| <b>Time</b>           | database building - 2022.06.28                                                                                                                                                                                                                                                                                                                                                                                                                                                                                                                                                                                                                                                                                                                                                                                                                                                                                    |
| <b>Results</b>        | 27                                                                                                                                                                                                                                                                                                                                                                                                                                                                                                                                                                                                                                                                                                                                                                                                                                                                                                                |
| <b>Search details</b> | Search: (((nlr[Title/Abstract]) OR (Neutrophil to lymphocyte ratio[Title/Abstract])) OR ("Neutrophil and lymphocyte ratio"[Title/Abstract])) AND (((Infant, Newborn[Title/Abstract]) OR (Newborn Infant[Title/Abstract])) OR (Newborn[Title/Abstract])) OR (Neonate[Title/Abstract])) OR ("Infant, Newborn"[Mesh])) AND (((((((Sepsis, Neonatal Late-Onset[Title/Abstract]) OR (Neonatal Sepses[Title/Abstract])) OR (Neonatal Sepsis[Title/Abstract])) OR (Early Onset Sepsis[Title/Abstract])) OR (Sepsis, Neonatal Early-Onset[Title/Abstract])) OR (LOS[Title/Abstract])) OR (EOS[Title/Abstract])) OR ("Neonatal Sepsis"[Mesh])) OR (((((((sepsis[Title/Abstract]) OR (Bloodstream Infection[Title/Abstract])) OR (Pyohemia[Title/Abstract])) OR (Pyaemia[Title/Abstract])) OR (Septicemia[Title/Abstract])) OR (Poisoning, Blood[Title/Abstract])) OR (Severe Sepsis[Title/Abstract])) OR ("Sepsis"[Mesh])) |
| <b>Database</b>       | Embase                                                                                                                                                                                                                                                                                                                                                                                                                                                                                                                                                                                                                                                                                                                                                                                                                                                                                                            |
| <b>Website</b>        | https://www.embase.com                                                                                                                                                                                                                                                                                                                                                                                                                                                                                                                                                                                                                                                                                                                                                                                                                                                                                            |
| <b>Time</b>           | database building - 2022.06.28                                                                                                                                                                                                                                                                                                                                                                                                                                                                                                                                                                                                                                                                                                                                                                                                                                                                                    |
| <b>Results</b>        | 47                                                                                                                                                                                                                                                                                                                                                                                                                                                                                                                                                                                                                                                                                                                                                                                                                                                                                                                |
| <b>Search details</b> | No. Query<br>#33: #10 AND #30 AND #32<br>#32: #1 OR #2 OR #3 OR #31<br>#31 : 'neutrophil lymphocyte ratio'/exp<br>#30: 'neutrophil lymphocyte ratio'/exp<br>#29 : #20 OR #21 OR #22 OR #23 OR #24 OR #25 OR #26 OR #27 OR #28<br>#28 : 'eos':ab,ti<br>#27 : 'los':ab,ti<br>#26 : 'sepsis, neonatal early-onset':ab,ti<br>#25 : 'early onset sepsis':ab,ti<br>#24 : 'sepsis, neonatal late-onset':ab,ti<br>#23 : 'neonatal sepsis':ab,ti<br>#22 : 'neonatal sepsis':ab,ti<br>#21 : 'newborn sepsis':ab,ti<br>#20 : 'newborn sepsis'/exp<br>#19 : #11 OR #12 OR #13 OR #14 OR #15 OR #16 OR #17 OR #18<br>#18 : 'severe sepsis':ab,ti<br>#17 : 'poisoning, blood':ab,ti<br>#16 : 'septicemia':ab,ti<br>#15 : 'pyohemia':ab,ti<br>#14 : 'pyohemia':ab,ti<br>#13 : 'bloodstream infection':ab,ti<br>#12 : 'sepsis':ab,ti                                                                                              |

|                       | <p>#11 : 'sepsis'/exp<br/> #10 : #5 OR #6 OR #7 OR #8<br/> #9 : 'neonate':ab,ti<br/> #8 : 'newborn':ab,ti<br/> #7 : 'newborn infant':ab,ti<br/> #6 : 'newborn':ab,ti<br/> #5 : 'newborn'/exp<br/> #4 : #1 OR #2 OR #3<br/> #3 : 'nlr':ab,ti<br/> #2 : 'neutrophil to lymphocyte ratio':ab,ti<br/> #1 : 'neutrophil and lymphocyte ratio':ab,ti</p>                                                                                                                                                                                                                                                                                                                                                                                                                                                                                                                                                                                                                                                                                                                                                                                                                                                                                                                                                                                                                                                                                                                                                                                                                                                           |       |        |      |    |                                                      |    |    |                                                                                                                                                                                                                     |      |    |                                                                       |       |    |                |       |    |                                             |      |    |                                                                                                                                                                  |       |    |                                                                                              |      |    |                |       |    |          |       |     |                                                      |       |     |                                                                                                                                          |       |     |            |       |
|-----------------------|--------------------------------------------------------------------------------------------------------------------------------------------------------------------------------------------------------------------------------------------------------------------------------------------------------------------------------------------------------------------------------------------------------------------------------------------------------------------------------------------------------------------------------------------------------------------------------------------------------------------------------------------------------------------------------------------------------------------------------------------------------------------------------------------------------------------------------------------------------------------------------------------------------------------------------------------------------------------------------------------------------------------------------------------------------------------------------------------------------------------------------------------------------------------------------------------------------------------------------------------------------------------------------------------------------------------------------------------------------------------------------------------------------------------------------------------------------------------------------------------------------------------------------------------------------------------------------------------------------------|-------|--------|------|----|------------------------------------------------------|----|----|---------------------------------------------------------------------------------------------------------------------------------------------------------------------------------------------------------------------|------|----|-----------------------------------------------------------------------|-------|----|----------------|-------|----|---------------------------------------------|------|----|------------------------------------------------------------------------------------------------------------------------------------------------------------------|-------|----|----------------------------------------------------------------------------------------------|------|----|----------------|-------|----|----------|-------|-----|------------------------------------------------------|-------|-----|------------------------------------------------------------------------------------------------------------------------------------------|-------|-----|------------|-------|
| <b>Database</b>       | Web of science                                                                                                                                                                                                                                                                                                                                                                                                                                                                                                                                                                                                                                                                                                                                                                                                                                                                                                                                                                                                                                                                                                                                                                                                                                                                                                                                                                                                                                                                                                                                                                                               |       |        |      |    |                                                      |    |    |                                                                                                                                                                                                                     |      |    |                                                                       |       |    |                |       |    |                                             |      |    |                                                                                                                                                                  |       |    |                                                                                              |      |    |                |       |    |          |       |     |                                                      |       |     |                                                                                                                                          |       |     |            |       |
| <b>Website</b>        | http://www.webofscience.com                                                                                                                                                                                                                                                                                                                                                                                                                                                                                                                                                                                                                                                                                                                                                                                                                                                                                                                                                                                                                                                                                                                                                                                                                                                                                                                                                                                                                                                                                                                                                                                  |       |        |      |    |                                                      |    |    |                                                                                                                                                                                                                     |      |    |                                                                       |       |    |                |       |    |                                             |      |    |                                                                                                                                                                  |       |    |                                                                                              |      |    |                |       |    |          |       |     |                                                      |       |     |                                                                                                                                          |       |     |            |       |
| <b>Time</b>           | database building - 2022.06.28                                                                                                                                                                                                                                                                                                                                                                                                                                                                                                                                                                                                                                                                                                                                                                                                                                                                                                                                                                                                                                                                                                                                                                                                                                                                                                                                                                                                                                                                                                                                                                               |       |        |      |    |                                                      |    |    |                                                                                                                                                                                                                     |      |    |                                                                       |       |    |                |       |    |                                             |      |    |                                                                                                                                                                  |       |    |                                                                                              |      |    |                |       |    |          |       |     |                                                      |       |     |                                                                                                                                          |       |     |            |       |
| <b>Results</b>        | 36                                                                                                                                                                                                                                                                                                                                                                                                                                                                                                                                                                                                                                                                                                                                                                                                                                                                                                                                                                                                                                                                                                                                                                                                                                                                                                                                                                                                                                                                                                                                                                                                           |       |        |      |    |                                                      |    |    |                                                                                                                                                                                                                     |      |    |                                                                       |       |    |                |       |    |                                             |      |    |                                                                                                                                                                  |       |    |                                                                                              |      |    |                |       |    |          |       |     |                                                      |       |     |                                                                                                                                          |       |     |            |       |
| <b>Search details</b> | <p>#1 (((((((((((TS=(Neonatal Sepsis)) OR TS=(Neonatal sepsis)) OR TS=(Sepsis, Neonatal Late-Onset)) OR TS=(Early Onset Sepsis)) OR TS=(Sepsis, Neonatal Early-Onset)) OR TS=(los)) OR TS=(eos)) OR TS=(sepsis)) OR TS=(Bloodstream Infection)) OR TS=(pyohemic)) OR TS=(pyaemic)) OR TS=(Septicemia)) OR TS=(Poisoning, Blood)) OR TS=(Severe Sepsis)<br/> #2 TS=(Neutrophil and lymphocyte ratio) or TS=(Neutrophil to lymphocyte ratio) or TS=(nlr)<br/> #3 (((TS=(Infant, Newborn)) OR TS=(Newborn Infant)) OR TS=(Newborn)) OR TS=(Neonate)<br/> #1 and #2 and #3</p>                                                                                                                                                                                                                                                                                                                                                                                                                                                                                                                                                                                                                                                                                                                                                                                                                                                                                                                                                                                                                                   |       |        |      |    |                                                      |    |    |                                                                                                                                                                                                                     |      |    |                                                                       |       |    |                |       |    |                                             |      |    |                                                                                                                                                                  |       |    |                                                                                              |      |    |                |       |    |          |       |     |                                                      |       |     |                                                                                                                                          |       |     |            |       |
| <b>Database</b>       | Cochrane                                                                                                                                                                                                                                                                                                                                                                                                                                                                                                                                                                                                                                                                                                                                                                                                                                                                                                                                                                                                                                                                                                                                                                                                                                                                                                                                                                                                                                                                                                                                                                                                     |       |        |      |    |                                                      |    |    |                                                                                                                                                                                                                     |      |    |                                                                       |       |    |                |       |    |                                             |      |    |                                                                                                                                                                  |       |    |                                                                                              |      |    |                |       |    |          |       |     |                                                      |       |     |                                                                                                                                          |       |     |            |       |
| <b>Website</b>        | https://www.cochrane.org                                                                                                                                                                                                                                                                                                                                                                                                                                                                                                                                                                                                                                                                                                                                                                                                                                                                                                                                                                                                                                                                                                                                                                                                                                                                                                                                                                                                                                                                                                                                                                                     |       |        |      |    |                                                      |    |    |                                                                                                                                                                                                                     |      |    |                                                                       |       |    |                |       |    |                                             |      |    |                                                                                                                                                                  |       |    |                                                                                              |      |    |                |       |    |          |       |     |                                                      |       |     |                                                                                                                                          |       |     |            |       |
| <b>Time</b>           | database building - 2022.06.28                                                                                                                                                                                                                                                                                                                                                                                                                                                                                                                                                                                                                                                                                                                                                                                                                                                                                                                                                                                                                                                                                                                                                                                                                                                                                                                                                                                                                                                                                                                                                                               |       |        |      |    |                                                      |    |    |                                                                                                                                                                                                                     |      |    |                                                                       |       |    |                |       |    |                                             |      |    |                                                                                                                                                                  |       |    |                                                                                              |      |    |                |       |    |          |       |     |                                                      |       |     |                                                                                                                                          |       |     |            |       |
| <b>Results</b>        | 30                                                                                                                                                                                                                                                                                                                                                                                                                                                                                                                                                                                                                                                                                                                                                                                                                                                                                                                                                                                                                                                                                                                                                                                                                                                                                                                                                                                                                                                                                                                                                                                                           |       |        |      |    |                                                      |    |    |                                                                                                                                                                                                                     |      |    |                                                                       |       |    |                |       |    |                                             |      |    |                                                                                                                                                                  |       |    |                                                                                              |      |    |                |       |    |          |       |     |                                                      |       |     |                                                                                                                                          |       |     |            |       |
| <b>Search details</b> | <table border="1"> <thead> <tr> <th>ID</th> <th>Search</th> <th>Hits</th> </tr> </thead> <tbody> <tr> <td>#1</td> <td>MeSH descriptor: [Neonatal Sepsis] explode all trees</td> <td>86</td> </tr> <tr> <td>#2</td> <td>(Neonatal Sepsis):ti,ab,kw OR (Sepsis, Neonatal Late-Onset):ti,ab,kw OR (Neonatal Sepses):ti,ab,kw OR (Early Onset Sepsis):ti,ab,kw OR (Sepsis, Neonatal Early-Onset):ti,ab,kw (Word variations have been searched)</td> <td>2151</td> </tr> <tr> <td>#3</td> <td>(LOS):ti,ab,kw OR (EOS):ti,ab,kw (Word variations have been searched)</td> <td>15529</td> </tr> <tr> <td>#4</td> <td>#1 or #2 or #3</td> <td>17494</td> </tr> <tr> <td>#5</td> <td>MeSH descriptor: [Sepsis] explode all trees</td> <td>4918</td> </tr> <tr> <td>#6</td> <td>(sepsis):ti,ab,kw OR (Bloodstream Infection):ti,ab,kw OR (Pyohemia):ti,ab,kw OR (Pyaemia):ti,ab,kw OR (Septicemia):ti,ab,kw (Word variations have been searched)</td> <td>13925</td> </tr> <tr> <td>#7</td> <td>(Poisoning, Blood):ti,ab,kw OR (Severe Sepsis):ti,ab,kw (Word variations have been searched)</td> <td>4942</td> </tr> <tr> <td>#8</td> <td>#5 or #6 or #7</td> <td>16646</td> </tr> <tr> <td>#9</td> <td>#4 or #8</td> <td>31666</td> </tr> <tr> <td>#10</td> <td>MeSH descriptor: [Infant, Newborn] explode all trees</td> <td>17498</td> </tr> <tr> <td>#11</td> <td>(Infant, Newborn):ti,ab,kw OR (Newborn Infant):ti,ab,kw OR (Newborn):ti,ab,kw OR (Neonate):ti,ab,kw (Word variations have been searched)</td> <td>40837</td> </tr> <tr> <td>#12</td> <td>#10 or #11</td> <td>40928</td> </tr> </tbody> </table> | ID    | Search | Hits | #1 | MeSH descriptor: [Neonatal Sepsis] explode all trees | 86 | #2 | (Neonatal Sepsis):ti,ab,kw OR (Sepsis, Neonatal Late-Onset):ti,ab,kw OR (Neonatal Sepses):ti,ab,kw OR (Early Onset Sepsis):ti,ab,kw OR (Sepsis, Neonatal Early-Onset):ti,ab,kw (Word variations have been searched) | 2151 | #3 | (LOS):ti,ab,kw OR (EOS):ti,ab,kw (Word variations have been searched) | 15529 | #4 | #1 or #2 or #3 | 17494 | #5 | MeSH descriptor: [Sepsis] explode all trees | 4918 | #6 | (sepsis):ti,ab,kw OR (Bloodstream Infection):ti,ab,kw OR (Pyohemia):ti,ab,kw OR (Pyaemia):ti,ab,kw OR (Septicemia):ti,ab,kw (Word variations have been searched) | 13925 | #7 | (Poisoning, Blood):ti,ab,kw OR (Severe Sepsis):ti,ab,kw (Word variations have been searched) | 4942 | #8 | #5 or #6 or #7 | 16646 | #9 | #4 or #8 | 31666 | #10 | MeSH descriptor: [Infant, Newborn] explode all trees | 17498 | #11 | (Infant, Newborn):ti,ab,kw OR (Newborn Infant):ti,ab,kw OR (Newborn):ti,ab,kw OR (Neonate):ti,ab,kw (Word variations have been searched) | 40837 | #12 | #10 or #11 | 40928 |
| ID                    | Search                                                                                                                                                                                                                                                                                                                                                                                                                                                                                                                                                                                                                                                                                                                                                                                                                                                                                                                                                                                                                                                                                                                                                                                                                                                                                                                                                                                                                                                                                                                                                                                                       | Hits  |        |      |    |                                                      |    |    |                                                                                                                                                                                                                     |      |    |                                                                       |       |    |                |       |    |                                             |      |    |                                                                                                                                                                  |       |    |                                                                                              |      |    |                |       |    |          |       |     |                                                      |       |     |                                                                                                                                          |       |     |            |       |
| #1                    | MeSH descriptor: [Neonatal Sepsis] explode all trees                                                                                                                                                                                                                                                                                                                                                                                                                                                                                                                                                                                                                                                                                                                                                                                                                                                                                                                                                                                                                                                                                                                                                                                                                                                                                                                                                                                                                                                                                                                                                         | 86    |        |      |    |                                                      |    |    |                                                                                                                                                                                                                     |      |    |                                                                       |       |    |                |       |    |                                             |      |    |                                                                                                                                                                  |       |    |                                                                                              |      |    |                |       |    |          |       |     |                                                      |       |     |                                                                                                                                          |       |     |            |       |
| #2                    | (Neonatal Sepsis):ti,ab,kw OR (Sepsis, Neonatal Late-Onset):ti,ab,kw OR (Neonatal Sepses):ti,ab,kw OR (Early Onset Sepsis):ti,ab,kw OR (Sepsis, Neonatal Early-Onset):ti,ab,kw (Word variations have been searched)                                                                                                                                                                                                                                                                                                                                                                                                                                                                                                                                                                                                                                                                                                                                                                                                                                                                                                                                                                                                                                                                                                                                                                                                                                                                                                                                                                                          | 2151  |        |      |    |                                                      |    |    |                                                                                                                                                                                                                     |      |    |                                                                       |       |    |                |       |    |                                             |      |    |                                                                                                                                                                  |       |    |                                                                                              |      |    |                |       |    |          |       |     |                                                      |       |     |                                                                                                                                          |       |     |            |       |
| #3                    | (LOS):ti,ab,kw OR (EOS):ti,ab,kw (Word variations have been searched)                                                                                                                                                                                                                                                                                                                                                                                                                                                                                                                                                                                                                                                                                                                                                                                                                                                                                                                                                                                                                                                                                                                                                                                                                                                                                                                                                                                                                                                                                                                                        | 15529 |        |      |    |                                                      |    |    |                                                                                                                                                                                                                     |      |    |                                                                       |       |    |                |       |    |                                             |      |    |                                                                                                                                                                  |       |    |                                                                                              |      |    |                |       |    |          |       |     |                                                      |       |     |                                                                                                                                          |       |     |            |       |
| #4                    | #1 or #2 or #3                                                                                                                                                                                                                                                                                                                                                                                                                                                                                                                                                                                                                                                                                                                                                                                                                                                                                                                                                                                                                                                                                                                                                                                                                                                                                                                                                                                                                                                                                                                                                                                               | 17494 |        |      |    |                                                      |    |    |                                                                                                                                                                                                                     |      |    |                                                                       |       |    |                |       |    |                                             |      |    |                                                                                                                                                                  |       |    |                                                                                              |      |    |                |       |    |          |       |     |                                                      |       |     |                                                                                                                                          |       |     |            |       |
| #5                    | MeSH descriptor: [Sepsis] explode all trees                                                                                                                                                                                                                                                                                                                                                                                                                                                                                                                                                                                                                                                                                                                                                                                                                                                                                                                                                                                                                                                                                                                                                                                                                                                                                                                                                                                                                                                                                                                                                                  | 4918  |        |      |    |                                                      |    |    |                                                                                                                                                                                                                     |      |    |                                                                       |       |    |                |       |    |                                             |      |    |                                                                                                                                                                  |       |    |                                                                                              |      |    |                |       |    |          |       |     |                                                      |       |     |                                                                                                                                          |       |     |            |       |
| #6                    | (sepsis):ti,ab,kw OR (Bloodstream Infection):ti,ab,kw OR (Pyohemia):ti,ab,kw OR (Pyaemia):ti,ab,kw OR (Septicemia):ti,ab,kw (Word variations have been searched)                                                                                                                                                                                                                                                                                                                                                                                                                                                                                                                                                                                                                                                                                                                                                                                                                                                                                                                                                                                                                                                                                                                                                                                                                                                                                                                                                                                                                                             | 13925 |        |      |    |                                                      |    |    |                                                                                                                                                                                                                     |      |    |                                                                       |       |    |                |       |    |                                             |      |    |                                                                                                                                                                  |       |    |                                                                                              |      |    |                |       |    |          |       |     |                                                      |       |     |                                                                                                                                          |       |     |            |       |
| #7                    | (Poisoning, Blood):ti,ab,kw OR (Severe Sepsis):ti,ab,kw (Word variations have been searched)                                                                                                                                                                                                                                                                                                                                                                                                                                                                                                                                                                                                                                                                                                                                                                                                                                                                                                                                                                                                                                                                                                                                                                                                                                                                                                                                                                                                                                                                                                                 | 4942  |        |      |    |                                                      |    |    |                                                                                                                                                                                                                     |      |    |                                                                       |       |    |                |       |    |                                             |      |    |                                                                                                                                                                  |       |    |                                                                                              |      |    |                |       |    |          |       |     |                                                      |       |     |                                                                                                                                          |       |     |            |       |
| #8                    | #5 or #6 or #7                                                                                                                                                                                                                                                                                                                                                                                                                                                                                                                                                                                                                                                                                                                                                                                                                                                                                                                                                                                                                                                                                                                                                                                                                                                                                                                                                                                                                                                                                                                                                                                               | 16646 |        |      |    |                                                      |    |    |                                                                                                                                                                                                                     |      |    |                                                                       |       |    |                |       |    |                                             |      |    |                                                                                                                                                                  |       |    |                                                                                              |      |    |                |       |    |          |       |     |                                                      |       |     |                                                                                                                                          |       |     |            |       |
| #9                    | #4 or #8                                                                                                                                                                                                                                                                                                                                                                                                                                                                                                                                                                                                                                                                                                                                                                                                                                                                                                                                                                                                                                                                                                                                                                                                                                                                                                                                                                                                                                                                                                                                                                                                     | 31666 |        |      |    |                                                      |    |    |                                                                                                                                                                                                                     |      |    |                                                                       |       |    |                |       |    |                                             |      |    |                                                                                                                                                                  |       |    |                                                                                              |      |    |                |       |    |          |       |     |                                                      |       |     |                                                                                                                                          |       |     |            |       |
| #10                   | MeSH descriptor: [Infant, Newborn] explode all trees                                                                                                                                                                                                                                                                                                                                                                                                                                                                                                                                                                                                                                                                                                                                                                                                                                                                                                                                                                                                                                                                                                                                                                                                                                                                                                                                                                                                                                                                                                                                                         | 17498 |        |      |    |                                                      |    |    |                                                                                                                                                                                                                     |      |    |                                                                       |       |    |                |       |    |                                             |      |    |                                                                                                                                                                  |       |    |                                                                                              |      |    |                |       |    |          |       |     |                                                      |       |     |                                                                                                                                          |       |     |            |       |
| #11                   | (Infant, Newborn):ti,ab,kw OR (Newborn Infant):ti,ab,kw OR (Newborn):ti,ab,kw OR (Neonate):ti,ab,kw (Word variations have been searched)                                                                                                                                                                                                                                                                                                                                                                                                                                                                                                                                                                                                                                                                                                                                                                                                                                                                                                                                                                                                                                                                                                                                                                                                                                                                                                                                                                                                                                                                     | 40837 |        |      |    |                                                      |    |    |                                                                                                                                                                                                                     |      |    |                                                                       |       |    |                |       |    |                                             |      |    |                                                                                                                                                                  |       |    |                                                                                              |      |    |                |       |    |          |       |     |                                                      |       |     |                                                                                                                                          |       |     |            |       |
| #12                   | #10 or #11                                                                                                                                                                                                                                                                                                                                                                                                                                                                                                                                                                                                                                                                                                                                                                                                                                                                                                                                                                                                                                                                                                                                                                                                                                                                                                                                                                                                                                                                                                                                                                                                   | 40928 |        |      |    |                                                      |    |    |                                                                                                                                                                                                                     |      |    |                                                                       |       |    |                |       |    |                                             |      |    |                                                                                                                                                                  |       |    |                                                                                              |      |    |                |       |    |          |       |     |                                                      |       |     |                                                                                                                                          |       |     |            |       |



|                       |                                                                                                                                                                                                     |
|-----------------------|-----------------------------------------------------------------------------------------------------------------------------------------------------------------------------------------------------|
|                       | #13 (Neutrophil and lymphocyte ratio):ti,ab,kw OR (Neutrophil to lymphocyte ratio):ti,ab,kw OR (nlr):ti,ab,kw (Word variations have been searched) 915<br>#14 #9 or #12 68896<br>#15 #14 and #13 30 |
| <b>Database</b>       | CNKI ( <i>Chinese database</i> )                                                                                                                                                                    |
| <b>Website</b>        | <a href="https://www.cnki.net">https://www.cnki.net</a>                                                                                                                                             |
| <b>Time</b>           | database building - 2022.06.28                                                                                                                                                                      |
| <b>Results</b>        | 195                                                                                                                                                                                                 |
| <b>Search detail</b>  | (主题=脓毒症 + 败血症 + 新生儿败血症 + 血流感染 + 早发性败血症 + 迟发性败血症 + 血液中毒 + 新生儿脓毒症) AND (主题=中性粒淋巴细胞比 + nlr)                                                                                                            |
| <b>Database</b>       | Wanfang ( <i>Chinese database</i> )                                                                                                                                                                 |
| <b>Website</b>        | <a href="https://www.wanfangdata.com.cn/index.html">https://www.wanfangdata.com.cn/index.html</a>                                                                                                   |
| <b>Time</b>           | database building - 2022.06.28                                                                                                                                                                      |
| <b>Results</b>        | 319                                                                                                                                                                                                 |
| <b>Search details</b> | 检索表达式(中英文扩展&主题词扩展): 主题:(新生儿败血症 or 败血症 or 新生儿脓毒症 or 脓毒症 or 早发性败血症 or 迟发性败血症 or 血流感染 ) and 主题:(中性粒淋巴细胞比值 or nlr)                                                                                      |
| <b>Database</b>       | China Biomedical Literature Database ( <i>Chinese database</i> )                                                                                                                                    |
| <b>Website</b>        | <a href="http://www.sinomed.ac.cn/index.jsp">http://www.sinomed.ac.cn/index.jsp</a>                                                                                                                 |
| <b>Time</b>           | database building - 2022.06.28                                                                                                                                                                      |
| <b>Results</b>        | 137                                                                                                                                                                                                 |
| <b>Search details</b> | ((("中性粒淋巴细胞比值"[常用字段:智能] OR "nlr"[常用字段:智能])) AND (("脓毒症"[常用字段:智能] OR "败血症"[常用字段:智能] OR "新生儿脓毒症"[常用字段:智能] OR "新生儿败血症"[常用字段:智能] OR "早发性败血症"[常用字段:智能] OR "迟发性败血症"[常用字段:智能] OR "血流感染"[常用字段:智能]))         |
| <b>Database</b>       | VIP Database ( <i>Chinese database</i> )                                                                                                                                                            |
| <b>Website</b>        | <a href="http://qikan.cqvip.com">http://qikan.cqvip.com</a>                                                                                                                                         |
| <b>Time</b>           | database building - 2022.06.28                                                                                                                                                                      |
| <b>Results</b>        | 43                                                                                                                                                                                                  |
| <b>Search details</b> | 检索表达式(主题词扩展): 主题:(新生儿败血症 or 败血症 or 新生儿脓毒症 or 脓毒症 or 早发性败血症 or 迟发性败血症 or 血流感染 ) and 主题:(中性粒淋巴细胞比值 or nlr)                                                                                            |

Table 1 characteristics of the included 14 studies.

| Author                     | Year | Selected time | Study design          | Sepsis diagnosis | Region      | Early /Late | Case/C ontrol | T P | F P | F N | T N | SE   | SP   | Cut off | Neonates   |
|----------------------------|------|---------------|-----------------------|------------------|-------------|-------------|---------------|-----|-----|-----|-----|------|------|---------|------------|
| R H Ruslie [1]             | 2018 | 2016-2017     | Retrospective         | Blood culture    | USA         | EOS、<br>LOS | 52/42         | 32  | 14  | 20  | 28  | 61.5 | 66.7 | 9.4     | A、 B、<br>C |
| Senem Alkan Ozdemir [2]    | 2017 | 2014-2015     | Prospective           | Blood culture    | Turkey      | LOS         | 52/75         | 38  | 16  | 14  | 58  | 73   | 78   | 1.77    | A          |
| Ori Goldberg [3]           | 2020 | 2016-2019     | Retrospective         | Blood culture    | Israel      | LOS         | 31/62         | 26  | 13  | 5   | 49  | 83.9 | 79   | 1.5     | A、 B、<br>C |
| Rocky Wilar, MD [4]        | 2018 | 2017-2017     | Cross-sectional study | Blood culture    | Indonesia   | EOS         | 90/30         | 75  | 2   | 15  | 28  | 83.3 | 93.3 | 1.24    | A、 B、<br>C |
| Khadijah Rizky Sumitro [5] | 2021 | 2019-2019     | Cross-sectional study | Blood culture    | Indonesia   | EOS、<br>LOS | 52/52         | 42  | 30  | 10  | 22  | 80.8 | 42.3 | 2.12    | A、 B、<br>C |
| Xiaoyu Du [6]              | 2019 | 2015-2017     | Retrospective         | Blood culture    | China       | EOS、<br>LOS | 58/30         | 43  | 6   | 15  | 24  | 73.3 | 81   | 0.7     | NA         |
| Shujian Zhang [7]          | 2021 | 2018-2020     | Descriptive study     | Blood culture    | China       | EOS         | 74/50         | 57  | 11  | 17  | 39  | 77   | 78   | 3.16    | A、 B、<br>C |
| Santosh K. Panda [8]       | 2021 | 2018-2018     | Retrospective         | Blood culture    | Philippines | EOS、<br>LOS | 41/52         | 28  | 28  | 13  | 24  | 68.3 | 46.2 | 1.7     | A、 B、<br>C |
| Emrah Can, MD [9]          | 2017 | 2015-2017     | Prospective           | Blood culture    | Turkey      | EOS         | 78/44         | 76  | 0   | 2   | 44  | 97.4 | 100  | 6.76    | B          |
| Nagwa Mohamed, SAM [10]    | 2020 | 2018-2019     | Prospective           | Blood culture    | Egypt       | EOS         | 40/40         | 27  | 0   | 13  | 40  | 67   | 99   | 0.1     | B          |
| Sara Mohamed Mira [11]     | 2021 | 2018-2019     | Retrospective         | Blood culture    | Egypt       | EOS         | 60/60         | 43  | 0   | 17  | 60  | 72   | 100  | 1       | A、 B       |
| Ipek Guney Varal [12]      | 2020 | 2016-2018     | Retrospective         | Blood culture    | Turkey      | LOS         | 76/40         | 52  | 7   | 24  | 33  | 68   | 82   | 1.57    | A          |
| Heriyanto Lim [13]         | 2021 | 2018-2018     | Retrospective         | Blood culture    | Indonesia   | EOS、<br>LOS | 22/62         | 18  | 21  | 4   | 41  | 81.8 | 66.1 | 2.31    | A、 B       |

|   |                    |      |           |               |               |        |      |       |   |   |    |    |     |      |      |    |
|---|--------------------|------|-----------|---------------|---------------|--------|------|-------|---|---|----|----|-----|------|------|----|
| 1 |                    |      |           |               |               |        | EOS、 | 57/77 | 5 | 1 | 52 | 76 | 8.8 | 98.7 | 4.79 |    |
| 2 |                    |      |           |               |               |        | LOS  |       |   |   |    |    |     |      |      | NA |
| 3 | Abdullah Kurt [14] | 2022 | 2016-2018 | Retrospective | Blood culture | Turkey | EOS  | 20/77 | 3 | 1 | 17 | 76 | 15  | 98.7 | 4.79 |    |
| 4 |                    |      |           |               |               |        | LOS  | 37/77 | 2 | 1 | 35 | 76 | 5.4 | 98.7 | 4.94 |    |

**Note:** EOS: Early-onset sepsis, LOS: Late-onset sepsis, A: Preterm, B: Term, C: Late term, NA:Not Available, TP: true positive, FP: false positive, TN: true negative, FN: false negative, SEN: sensitivity, SPE: specificity.

## Reference

- [1] Ruslie R H, Tjipta D G, Samosir C T, et al. Bacterial pattern, and role of laboratory parameters as marker for neonatal sepsis[C]/IOP Conference Series: Earth and Environmental Science. *IOP Publishing*, 2018, 125(1): 012057.
- [2] Alkan Ozdemir S ,S, Arun Ozer E , Ilhan O , et al. Can neutrophil to lymphocyte ratio predict late-onset sepsis in preterm infants?[infants? [J]. *Journal of Clinical Laboratory Analysis*, 2017:e22338.
- [3] Goldberg O, Amitai N, Chodick G, et al. Can we improve early identification of neonatal late-onset sepsis? A validated prediction model[J]. *Journal of Perinatology*, 2020, 40(9): p. 1315-1322.

- 1  
2  
3  
4  
5 [4] Wilar R. Diagnostic value of eosinopenia and neutrophil to lymphocyte ratio on early onset neonatal sepsis[J]. *Korean Journal of Pediatrics*, 2018, 62(6): p. 217-  
6 223.  
7  
8  
9  
10 [5] Sumitro K R , Utomo M T , Widodo A . Neutrophil-to-Lymphocyte Ratio as an Alternative Marker of Neonatal Sepsis in Developing Countries[J]. *Oman Medical*  
11 *Journal*, 2021, 36(1):e214-e214.  
12  
13  
14  
15 [6] Du xiaoyu,Ai liang. Changes and clinical significance of NLR, CRP and PCT in neonates with sepsis. *Experimental and Laboratory Medicine*,2019.37(01): p.110-  
16 112.  
17  
18  
19  
20 [7] Zhang, S.J.Platelet-to-Lymphocyte and Neutrophil-to-Lymphocyte Ratio as Predictive Biomarkers for Early-onset Neonatal Sepsis. *Jcsp-Journal of the College*  
21 *of Physicians and Surgeons Pakistan*, 2021. 31(7): p. 821-824.  
22  
23  
24  
25 [8] Panda S K, Nayak M K, Rath S, et al. The Utility of the Neutrophil-Lymphocyte Ratio as an Early Diagnostic Marker in Neonatal Sepsis[J]. *Cureus*, 2021, 13(1):  
26 e12891.  
27  
28  
29  
30 [9] E.C, H.S,C.C,et al.The Value of Neutrophil to Lymphocyte Ratio and Platelet to Lymphocyte Ratio for Detecting Early-onset Neonatal Sepsis. *Journal of pediatric*  
31 *hematology/oncology*, 2018. 40(4) E229-E232.  
32  
33  
34  
35  
36  
37  
38  
39  
40  
41  
42  
43  
44  
45  
46

- 1  
2  
3  
4  
5 [10] Mahmoud N M S A, Baheeg G, Abdelhakeem M, et al. Platelet to Lymphocyte Ratio and Neutrophil to Lymphocyte Ratio as New Diagnostic Markers for Detection  
6 of Early-onset Neonatal Sepsis in Full-term Newborns. 2019.  
7  
8  
9  
10 [11] Mira S M, Alkhalegy H A, Abd-Elraheem S I, et al. Neutrophil and Platelet to Lymphocyte Ratio for Detecting Early-onset Neonatal Sepsis[J]. *International*  
11 *Journal of Medical Arts*, 2021, 3(2): 1274-1281.  
12  
13  
14 [12] Varal I, Dogan P. Can neutrophil-lymphocyte ratio be a predictor of late-onset sepsis in preterm infants? [J]. *Annals of Medical Research*, 2020, 27(1):23.  
15  
16  
17 [13] Lim, H. Sukmawati. M, Artana. W. D, et al. Validity of neutrophil lymphocyte count ratio in neonatal sepsis. *International Journal of Health*  
18 *Sciences*, (2021).5(2), 53-61.  
19  
20  
21 [14] Kurt A, Tosun MS, Altuntaş N: Diagnostic accuracy of complete blood cell count and neutrophil-to-lymphocyte, lymphocyte-to-monocyte,  
22 and platelet-to-lymphocyte ratios for neonatal infection. *Asian Biomedicine* 2022, 16(1):43-52.  
23  
24  
25  
26  
27  
28  
29  
30  
31  
32  
33  
34  
35  
36  
37  
38  
39  
40  
41  
42  
43  
44  
45  
46

**Table 2 The result of meta-regression****Sensitivity and Specificity**

| Parameter   | Category            | Studies | Sen  | P1   | Spe  | P2   |
|-------------|---------------------|---------|------|------|------|------|
| Asia        | Yes                 | 11      | 0.75 | 0.92 | 0.84 | 0.28 |
|             | No                  | 3       | 0.67 |      | 0.98 |      |
| Year (2019) | Yes ( $\geq 2019$ ) | 10      | 0.69 | 0.08 | 0.87 | 0.87 |
|             | No ( $< 2019$ )     | 4       | 0.83 |      | 0.91 |      |
| Preterm     | Yes                 | 2       | 0.71 | 0.73 | 0.81 | 0.91 |
|             | No                  | 12      | 0.74 |      | 0.89 |      |
| Prospective | Yes                 | 3       | 0.84 | 0.62 | 0.98 | 0.01 |
|             | No                  | 11      | 0.70 |      | 0.83 |      |

**Joint Model**

| Parameter   | Category            | LRTChi <sup>2</sup> | Pvalue | I <sup>2</sup> | I <sup>2</sup> lo | I <sup>2</sup> hi |
|-------------|---------------------|---------------------|--------|----------------|-------------------|-------------------|
| Asia        | Yes                 | 2.74                | 0.25   | 27             | 0                 | 100               |
|             | No                  |                     |        |                |                   |                   |
| Year (2019) | Yes ( $\geq 2019$ ) | 1.82                | 0.40   | 0              | 0                 | 100               |
|             | No ( $< 2019$ )     |                     |        |                |                   |                   |
| Preterm     | Yes                 | 0.31                | 0.86   | 0              | 0                 | 100               |
|             | No                  |                     |        |                |                   |                   |
| Prospective | Yes                 | 5.28                | 0.07   | 62             | 15                | 100               |
|             | No                  |                     |        |                |                   |                   |

**Table 3 The results of sensitivity analysis**

| Studies                  | Studies          | Sen(95%CI)      | Spe(95%CI)      | LR <sup>-</sup> (95%CI) | LR <sup>+</sup> (95%CI) | DOR (95%CI) | AUC (95%CI)     | Q      |
|--------------------------|------------------|-----------------|-----------------|-------------------------|-------------------------|-------------|-----------------|--------|
| Overall                  | 14[1-14]         | 0.74[0.61-0.83] | 0.88[0.73-0.95] | 0.30[0.19-0.46]         | 6.3[2.6-15.5]           | 21[7-65]    | 0.87[0.84-0.89] | 140.85 |
| Remove non-Asian         | 11[2-9,12-14]    | 0.75[0.59-0.87] | 0.83[0.68-0.92] | 0.30[0.17-0.52]         | 4.4[2.2-8.9]            | 15[5-42]    | 0.86[0.83-0.89] | 120.59 |
| Remove preterm           | 12[1,3-11,13-14] | 0.74[0.59-0.85] | 0.90[0.72-0.97] | 0.29[0.17-0.48]         | 7.6[2.4-24.0]           | 27[7-107]   | 0.88[0.85-0.90] | 147.40 |
| Remove LOS               | 11[1,4-11,13,14] | 0.73[0.56-0.85] | 0.92[0.72-0.98] | 0.29[0.17-0.51]         | 8.6[2.3-32.8]           | 29[6-145]   | 0.88[0.85-0.90] | 147.96 |
| Remove Prospective study | 11[1,3-8,11-14]  | 0.70[0.56-0.81] | 0.83[0.66-0.92] | 0.36[0.25-0.53]         | 4.1[2.1-8.1]            | 11[5-25]    | 0.82[0.79-0.85] | 133.33 |

**Note:** Sen: sensitivity; Spe: specificity; LR<sup>-</sup>: negative likelihood ratio; LR<sup>+</sup>: positive likelihood ratio; DOR: diagnostic odds ratio; AUC: area under the curve;

## Reference

- [1] Ruslie R H, Tjipta D G, Samosir C T, et al. Bacterial pattern, and role of laboratory parameters as marker for neonatal sepsis[C]//IOP Conference Series: Earth and Environmental Science. *IOP Publishing*, 2018, 125(1): 012057.
- [2] Alkan Ozdemir S ,S, Arun Ozer E , Ilhan O , et al. Can neutrophil to lymphocyte ratio predict late-onset sepsis in preterm infants?[infants? [J]. *Journal of Clinical Laboratory Analysis*, 2017:e22338.
- [3] Goldberg O, Amitai N, Chodick G, et al. Can we improve early identification of neonatal late-onset sepsis? A validated prediction model[J]. *Journal of Perinatology*, 2020, 40(9): p. 1315-1322.

1  
2  
3  
4  
5 [4] Wilar R. Diagnostic value of eosinopenia and neutrophil to lymphocyte ratio on early onset neonatal sepsis[J]. *Korean Journal of Pediatrics*, 2018, 62(6): p.  
6 217-223.  
7

8  
9  
10 [5] Sumitro K R , Utomo M T , Widodo A . Neutrophil-to-Lymphocyte Ratio as an Alternative Marker of Neonatal Sepsis in Developing Countries[J]. *Oman Medical*  
11 *Journal*, 2021, 36(1):e214-e214.  
12

13  
14  
15 [6] Du xiaoyu,Ai liang. Changes and clinical significance of NLR, CRP and PCT in neonates with sepsis. *Experimental and Laboratory Medicine*,2019.37(01):  
16 p.110-112.  
17

18  
19  
20 [7] Zhang, S.J.Platelet-to-Lymphocyte and Neutrophil-to-Lymphocyte Ratio as Predictive Biomarkers for Early-onset Neonatal Sepsis. *Jcsp-Journal of the College*  
21 *of Physicians and Surgeons Pakistan*, 2021. 31(7): p. 821-824.  
22

23  
24  
25 [8] Panda S K, Nayak M K, Rath S, et al. The Utility of the Neutrophil-Lymphocyte Ratio as an Early Diagnostic Marker in Neonatal Sepsis[J]. *Cureus*, 2021, 13(1):  
26 e12891.  
27

28  
29  
30 [9] E.C, H.S,C.C,et al.The Value of Neutrophil to Lymphocyte Ratio and Platelet to Lymphocyte Ratio for Detecting Early-onset Neonatal Sepsis. *Journal of*  
31 *pediatric hematology/oncology*, 2018. 40(4) E229-E232.  
32  
33  
34  
35  
36  
37  
38  
39  
40  
41  
42  
43  
44  
45  
46



- 1  
2  
3  
4  
5 [10] Mahmoud N M S A, Baheeg G, Abdelhakeem M, et al. Platelet to Lymphocyte Ratio and Neutrophil to Lymphocyte Ratio as New Diagnostic Markers for  
6  
7  
8  
9  
10  
11  
12  
13  
14  
15  
16 [11] Mira S M, Alkhalegy H A, Abd-Elraheem S I, et al. Neutrophil and Platelet to Lymphocyte Ratio for Detecting Early-onset Neonatal Sepsis[J]. *International*  
17  
18  
19  
20  
21  
22  
23  
24  
25  
26  
27  
28  
29  
30  
31  
32  
33  
34  
35  
36  
37  
38  
39  
40  
41  
42  
43  
44  
45  
46
- [12] Varal I, Dogan P. Can neutrophil-lymphocyte ratio be a predictor of late-onset sepsis in preterm infants? [J]. *Annals of Medical Research*, 2020, 27(1):23.
- [13] Lim, H. Sukmawati. M, Artana. W. D, et al. Validity of neutrophil lymphocyte count ratio in neonatal sepsis. *International Journal of Health Sciences*, (2021).5(2), 53-61.
- [14] Kurt A, Tosun MS, Altuntaş N: Diagnostic accuracy of complete blood cell count and neutrophil-to-lymphocyte, lymphocyte-to-monocyte, and platelet-to-lymphocyte ratios for neonatal infection. *Asian Biomedicine* 2022, 16(1):43-52.

**Table 4 Subgroup analysis of neutrophil-to-lymphocyte ratio in the diagnosis of neonatal sepsis.**

| Subgroup        | Study number      | Sen  | Spe  | LR <sup>+</sup> | LR <sup>-</sup> | DOR   | AUC  |
|-----------------|-------------------|------|------|-----------------|-----------------|-------|------|
| All             | 14 [1-14]         | 0.74 | 0.88 | 6.35            | 0.30            | 21.27 | 0.87 |
| <b>Neonates</b> |                   |      |      |                 |                 |       |      |
| EOS             | 6 [4,7,9-11,14]   | 0.75 | 0.99 | 63.30           | 0.26            | 247   | 0.97 |
| LOS             | 4 [2,3,12,14]     | 0.60 | 0.85 | 3.71            | 0.41            | 11.14 | 0.85 |
| <b>Areas</b>    |                   |      |      |                 |                 |       |      |
| Asian           | 11 [2-9,12-14]    | 0.75 | 0.83 | 4.40            | 0.30            | 15    | 0.86 |
| Non-Asian       | 3 [1,10,11]       | 0.67 | 0.90 | 18.64           | 0.38            | 45.94 | 0.95 |
| <b>Cut off</b>  |                   |      |      |                 |                 |       |      |
| 0-2             | 8 [2-4,6,8,10-12] | 0.74 | 0.90 | 7.1             | 0.29            | 25    | 0.77 |
| 2-4             | 3 [5,7,13]        | 0.79 | 0.62 | 2.21            | 0.33            | 6.73  | 0.85 |
| >4              | 3 [1,9,14]        | 0.60 | 0.91 | 9.00            | 0.27            | 31.51 | 0.95 |

**Note:** SEN: sensitivity; SPE: specificity; LR<sup>-</sup>: negative likelihood ratio; LR<sup>+</sup>: positive likelihood ratio; DOR: diagnostic odds ratio; AUC: area under the curve;

#### Reference

- [1] Ruslie R H, Tjipta D G, Samosir C T, et al. Bacterial pattern, and role of laboratory parameters as marker for neonatal sepsis[C]/IOP Conference Series: Earth and Environmental Science. *IOP Publishing*, 2018, 125(1): 012057.
- [2] Alkan Ozdemir S ,S, Arun Ozer E , Ilhan O , et al. Can neutrophil to lymphocyte ratio predict late-onset sepsis in preterm infants?[infants? [J]. *Journal of Clinical Laboratory Analysis*, 2017:e22338.
- [3] Goldberg O, Amitai N, Chodick G, et al. Can we improve early identification of neonatal late-onset sepsis? A validated prediction model[J]. *Journal of Perinatology*, 2020, 40(9): p. 1315-1322.
- [4] Wilar R. Diagnostic value of eosinopenia and neutrophil to lymphocyte ratio on early onset neonatal sepsis[J]. *Korean Journal of Pediatrics*, 2018, 62(6): p. 217-223.

- 1  
2  
3  
4 [5] Sumitro K R , Utomo M T , Widodo A . Neutrophil-to-Lymphocyte Ratio as an Alternative  
5  
6 Marker of Neonatal Sepsis in Developing Countries[J]. *Oman Medical Journal*, 2021,  
7  
8 36(1):e214-e214.  
9  
10  
11 [6] Du xiaoyu,Ai liang. Changes and clinical significance of NLR, CRP and PCT in neonates with  
12  
13 sepsis. *Experimental and Laboratory Medicine*,2019.37(01): p.110-112.  
14  
15  
16 [7] Zhang, S.J.Platelet-to-Lymphocyte and Neutrophil-to-Lymphocyte Ratio as Predictive  
17  
18 Biomarkers for Early-onset Neonatal Sepsis. *Jcsp-Journal of the College of Physicians and*  
19  
20 *Surgeons Pakistan*, 2021. 31(7): p. 821-824.  
21  
22  
23 [8] Panda S K, Nayak M K, Rath S, et al. The Utility of the Neutrophil-Lymphocyte Ratio as an  
24  
25 Early Diagnostic Marker in Neonatal Sepsis[J]. *Cureus*, 2021, 13(1): e12891.  
26  
27  
28 [9] E.C, H.S,C.C,et al.The Value of Neutrophil to Lymphocyte Ratio and Platelet to Lymphocyte  
29  
30 Ratio for Detecting Early-onset Neonatal Sepsis. *Journal of pediatric hematology/oncology*, 2018.  
31  
32 40(4) E229-E232.  
33  
34  
35 [10] Mahmoud N M S A, Baheeg G, Abdelhakeem M, et al.Platelet to Lymphocyte Ratio and  
36  
37 Neutrophil to Lymphocyte Ratio as New Diagnostic Markers for Detection of Early-onset  
38  
39 Neonatal Sepsis in Full-term Newborns. 2019.  
40  
41  
42 [11] Mira S M, Alkhalegy H A, Abd-Elraheem S I, et al. Neutrophil and Platelet to Lymphocyte  
43  
44 Ratio for Detecting Early-onset Neonatal Sepsis[J]. *International Journal of Medical Arts*, 2021,  
45  
46 3(2): 1274-1281.  
47  
48  
49 [12] Varal I,Dogan P. Can neutrophil-lymphocyte ratio be a predictor of late-onset sepsis in  
50  
51 preterm infants? [J]. *Annals of Medical Research*, 2020, 27(1):23.  
52  
53  
54  
55  
56  
57  
58  
59  
60

1  
2  
3  
4 [13] Lim, H.Sukmawati.M, Artana.W. D,et al.Validity of neutrophil lymphocyte  
5  
6 count ratio in neonatal sepsis. *International Journal of Health Sciences*, (2021).5(2),  
7  
8 53-61.  
9

10  
11  
12 [14] Kurt A, Tosun MS, Altuntaş N: Diagnostic accuracy of complete blood cell  
13  
14 count and neutrophil-to-lymphocyte, lymphocyte-to-monocyte, and  
15  
16 platelet-to-lymphocyte ratios for neonatal infection. *Asian Biomedicine* 2022,  
17  
18 16(1):43-52.  
19  
20  
21  
22  
23  
24  
25  
26  
27  
28  
29  
30  
31  
32  
33  
34  
35  
36  
37  
38  
39  
40  
41  
42  
43  
44  
45  
46  
47  
48  
49  
50  
51  
52  
53  
54  
55  
56  
57  
58  
59  
60



# PRISMA-DTA for Abstracts Checklist

1  
2  
3  
4  
5  
6  
7  
8  
9  
10  
11  
12  
13  
14  
15  
16  
17  
18  
19  
20  
21  
22  
23  
24  
25  
26  
27  
28  
29  
30  
31  
32  
33  
34  
35  
36  
37  
38  
39  
40  
41  
42  
43  
44  
45  
46  
47

| Section/topic                | #  | PRISMA-DTA for Abstracts Checklist item                                                                                                                                                                                                                                                                                                                                                                                                                                                                                                                                                                           | Reported on page # |
|------------------------------|----|-------------------------------------------------------------------------------------------------------------------------------------------------------------------------------------------------------------------------------------------------------------------------------------------------------------------------------------------------------------------------------------------------------------------------------------------------------------------------------------------------------------------------------------------------------------------------------------------------------------------|--------------------|
| <b>TITLE and PURPOSE</b>     |    |                                                                                                                                                                                                                                                                                                                                                                                                                                                                                                                                                                                                                   |                    |
| Title                        | 1  | The accuracy of neutrophil to lymphocyte ratio for the diagnosis of neonatal sepsis: a systematic review and meta-analysis.                                                                                                                                                                                                                                                                                                                                                                                                                                                                                       | 1                  |
| Objectives                   | 2  | The purpose of this study was systematically and quantitatively to assess the value of neutrophil to lymphocyte ratio (NLR) for the diagnosis of neonatal sepsis by systematic review and meta-analysis.                                                                                                                                                                                                                                                                                                                                                                                                          | 2                  |
| <b>METHODS</b>               |    |                                                                                                                                                                                                                                                                                                                                                                                                                                                                                                                                                                                                                   |                    |
| Eligibility criteria         | 3  | (1).The purpose of the study is to evaluate or explore the diagnostic value of the neutrophils to lymphocytes ratio in neonatal sepsis; (2).The case group is newborns with confirmed neonatal sepsis, and the control group is newborns with non-neonatal sepsis; (3).The diagnostic gold standard is blood culture (4).It can directly or indirectly obtain the true positive, false positive, true negative, and false negative values of neutrophil-lymphocyte ratio in the diagnosis of neonatal sepsis; (5).The language is English or Chinese.                                                             | 5                  |
| Information sources          | 4  | We searched the Cochrane, PubMed, Embase, Web of Science, CNKI, Wanfang, China Biomedical Literature Database, and VIP Database for studies on the diagnostic accuracy of neonatal sepsis published before August 2021.                                                                                                                                                                                                                                                                                                                                                                                           | 4                  |
| Risk of bias & applicability | 5  | Assess the quality of the Diagnostic Accuracy Studies-2 (QUADAS-2) checklist.                                                                                                                                                                                                                                                                                                                                                                                                                                                                                                                                     | 6-7                |
| Synthesis of results         | A1 | Random effects model.                                                                                                                                                                                                                                                                                                                                                                                                                                                                                                                                                                                             |                    |
| <b>RESULTS</b>               |    |                                                                                                                                                                                                                                                                                                                                                                                                                                                                                                                                                                                                                   |                    |
| Included studies             | 6  | 13 studies were finally included, with 1365 newborns, including 726 in the study group and 639 in the control group. Among them, 3 were late-onset sepsis, 5 were early-onset sepsis, and 2 were preterm infants. Ten studies are from Asia, and three studies are from non-Asia.                                                                                                                                                                                                                                                                                                                                 | 6                  |
| Synthesis of results         | 7  | The pooled sensitivity of the ratio of in the diagnosis of neonatal sepsis was 0.77 (0.71-0.83), the pooled specificity was 0.86 (0.70-0.94), the positive likelihood ratio was 5.6(2.3-13.8), the negative likelihood ratio was 0.26(0.19-0.37), the diagnostic odds ratio was 21(95 % CI 7-69), area under the curve (AUC) was 0.84(0.81-0.87).                                                                                                                                                                                                                                                                 | 7                  |
| <b>DISCUSSION</b>            |    |                                                                                                                                                                                                                                                                                                                                                                                                                                                                                                                                                                                                                   |                    |
| Strengths and limitations    | 9  | (1). Although it is homogeneous to reduce the choice of bias applications, heterogeneity is still in the inclusive research. (2). The diagnosis of newborns will also have differences due to different researchers, which will result in false positive and false negative results for the diagnosis of neonatal sepsis, which in turn leads to bias. (3). A part of the included research is a retrospective study, so there may be a selection of research objects. (4). The included research comes from different countries, and newborns have different immunity in newborns of different races and gender. | 9                  |
| Interpretation               | 10 | The early diagnosis of neonatal sepsis is particularly important. The ratio of neutrophils to lymphocytes has high sensitivity and specificity for its early diagnosis. It can provide a warning for the clinic and take corresponding measures in time.                                                                                                                                                                                                                                                                                                                                                          | 10                 |
| <b>OTHER</b>                 |    |                                                                                                                                                                                                                                                                                                                                                                                                                                                                                                                                                                                                                   |                    |
| Funding                      | 11 | None                                                                                                                                                                                                                                                                                                                                                                                                                                                                                                                                                                                                              |                    |



# PRISMA-DTA for Abstracts Checklist

1  
2  
3  
4  
5  
6  
7  
8  
9  
10  
11  
12  
13  
14  
15  
16  
17  
18  
19  
20  
21  
22  
23  
24  
25  
26  
27  
28  
29  
30  
31  
32  
33  
34  
35  
36  
37  
38  
39  
40  
41  
42  
43  
44  
45  
46  
47

|              |    |                          |  |
|--------------|----|--------------------------|--|
| Registration | 12 | Prospero: CRD42021278881 |  |
|--------------|----|--------------------------|--|

*Adapted From:* McInnes MDF, Moher D, Thombs BD, McGrath TA, Bossuyt PM, The PRISMA-DTA Group (2018). Preferred Reporting Items for a Systematic Review and Meta-analysis of Diagnostic Test Accuracy Studies: The PRISMA-DTA Statement. JAMA. 2018 Jan 23;319(4):388-396. doi: 10.1001/jama.2017.19163.

For more information, visit: [www.prisma-statement.org](http://www.prisma-statement.org).

Page 1 of 1

For peer review only

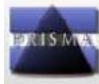

# PRISMA-DTA Checklist

1  
2  
3  
4  
5  
6  
7  
8  
9  
10  
11  
12  
13  
14  
15  
16  
17  
18  
19  
20  
21  
22  
23  
24  
25  
26  
27  
28  
29  
30  
31  
32  
33  
34  
35  
36  
37  
38  
39  
40  
41  
42  
43  
44  
45  
46  
47

| Section/topic                   | #  | PRISMA-DTA Checklist Item                                                                                                                                                                                                                                                                                                                                                                                                                                                                                                                             | Reported on page # |
|---------------------------------|----|-------------------------------------------------------------------------------------------------------------------------------------------------------------------------------------------------------------------------------------------------------------------------------------------------------------------------------------------------------------------------------------------------------------------------------------------------------------------------------------------------------------------------------------------------------|--------------------|
| <b>TITLE / ABSTRACT</b>         |    |                                                                                                                                                                                                                                                                                                                                                                                                                                                                                                                                                       |                    |
| Title                           | 1  | The accuracy of neutrophil to lymphocyte ratio for the diagnosis of neonatal sepsis: a systematic review and meta-analysis                                                                                                                                                                                                                                                                                                                                                                                                                            | 1                  |
| Abstract                        | 2  | Abstract: See PRISMA-DTA for abstracts.                                                                                                                                                                                                                                                                                                                                                                                                                                                                                                               | /                  |
| <b>INTRODUCTION</b>             |    |                                                                                                                                                                                                                                                                                                                                                                                                                                                                                                                                                       |                    |
| Rationale                       | 3  | The neutrophil to lymphocyte ratio (NLR) is an independent predictor in clinical that has been widely used in various diseases, such as Immune system disease, tumors, cancers, etc. Many studies have shown that the ratio of neutrophils to lymphocytes is more reliable for diagnosing neonatal sepsis than neutrophil counts or lymphocyte counts alone. Nevertheless, there still has a dispute about diagnosing the effectiveness of neonatal sepsis.                                                                                           | 2                  |
| Clinical role of index test     | D1 | /                                                                                                                                                                                                                                                                                                                                                                                                                                                                                                                                                     |                    |
| Objectives                      | 4  | The purpose of this study was systematically and quantitatively to assess the value of neutrophil to lymphocyte ratio (NLR) for the diagnosis of neonatal sepsis by systematic review and meta-analysis.                                                                                                                                                                                                                                                                                                                                              | 2                  |
| <b>METHODS</b>                  |    |                                                                                                                                                                                                                                                                                                                                                                                                                                                                                                                                                       |                    |
| Protocol and registration       | 5  | Prospero: CRD42021278881                                                                                                                                                                                                                                                                                                                                                                                                                                                                                                                              |                    |
| Eligibility criteria            | 6  | (1).The purpose of the study is to evaluate (or explore the diagnostic value of the neutrophils to lymphocytes ratio in neonatal sepsis;(2).The case group is newborns with confirmed neonatal sepsis, and the control group is newborns with non-neonatal sepsis; (3).The diagnostic gold standard is blood culture (4).It can directly or indirectly obtain the true positive, false positive, true negative, and false negative values of neutrophil-lymphocyte ratio in the diagnosis of neonatal sepsis; (5).The language is English or Chinese. | 5                  |
| Information sources             | 7  | We searched the Cochrane, PubMed, Embase, Web of Science, CNKI, Wanfang, China Biomedical Literature Database, and VIP Database for studies on the diagnostic accuracy of neonatal sepsis published before August 2021.                                                                                                                                                                                                                                                                                                                               | 4                  |
| Search                          | 8  | We used a combination of subject words and free words to search the study and the following keywords: "Neutrophil and lymphocyte ratio," "Infant," "Newborn," "Neonate," "sepsis," "septicemia," "Neonatal Sepsis.                                                                                                                                                                                                                                                                                                                                    | 4                  |
| Study selection                 | 9  | Two reviewers independently screened the literature, extracted data and evaluated the included studies according to the inclusion criteria,exclusion criteria and methodological quality. In case of disagreement, discuss and resolve or hand over to a third party assist in ruling.                                                                                                                                                                                                                                                                | 5                  |
| Data collection process         | 10 | Two researchers extract the data according to the designed data extraction table, and finally cross-check the extraction situation. If there is any difference, it will be resolved through discussion and negotiation.                                                                                                                                                                                                                                                                                                                               | 5                  |
| Definitions for data extraction | 11 | There are two authors independently extracted data from the included literature, including the year of publication, country of origin, study design, author, publication year, Newborn birth situation, study location, sample size, case and control numbers, cut-off value, true positive value, false-positive value, false-negative value, true negative value, sensitivity, and specificity.                                                                                                                                                     | 5                  |
| Risk of bias and applicability  | 12 | Assess the quality of the Diagnostic Accuracy Studies-2 (QUADAS-2) checklist.<br>For peer review only - <a href="http://bmjopen.bmj.com/site/about/guidelines.xhtml">http://bmjopen.bmj.com/site/about/guidelines.xhtml</a>                                                                                                                                                                                                                                                                                                                           | 6                  |

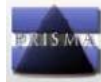

# PRISMA-DTA Checklist

1  
2  
3  
4  
5  
6  
7  
8  
9  
10  
11  
12  
13  
14  
15  
16  
17  
18  
19  
20  
21  
22  
23  
24  
25  
26  
27  
28  
29  
30  
31  
32  
33  
34  
35  
36  
37  
38  
39  
40  
41  
42  
43  
44  
45  
46  
47

|                              |    |                                                                                                                                                                                                                                                                                                                                                                                                                                                                                                                                                                                                                                                                                                                                                                                                                                                                                                                                                                                                                                                                                                                                     |     |
|------------------------------|----|-------------------------------------------------------------------------------------------------------------------------------------------------------------------------------------------------------------------------------------------------------------------------------------------------------------------------------------------------------------------------------------------------------------------------------------------------------------------------------------------------------------------------------------------------------------------------------------------------------------------------------------------------------------------------------------------------------------------------------------------------------------------------------------------------------------------------------------------------------------------------------------------------------------------------------------------------------------------------------------------------------------------------------------------------------------------------------------------------------------------------------------|-----|
| Diagnostic accuracy measures | 13 | ROC curve analysis was used for the included studies to calculate the combined sensitivity, specificity, positive likelihood ratio, negative likelihood ratio, diagnostic odds ratio, and area under the curve (AUC). All results were expressed with 95% CI.                                                                                                                                                                                                                                                                                                                                                                                                                                                                                                                                                                                                                                                                                                                                                                                                                                                                       | 5-6 |
| Synthesis of results         | 14 | The $I^2$ test evaluated study heterogeneity. $I^2 > 50\%$ indicated that the heterogeneity generated in the study would have a specific impact. Meta Disc1.4 software was used to analyze the threshold effect heterogeneity. If the effect sizes of the studies are homogeneous, the fixed-effects model will be used; if they are heterogeneous, the random-effects model will be used. If there is heterogeneity between the studies, the source of the heterogeneity shall be further explored, and the threshold effect and non-threshold effect analysis shall be carried out. The combined sensitivity, combined specificity, combined diagnostic odds ratio (DOR), combined positive likelihood ratio (PLR), combined negative likelihood ratio, and its 95% confidence interval (95%CI) were performed through stata16.0; Simultaneously perform a combined receiver operating characteristic curve (SROC) fitting analysis. At the same time, the Deeks test was used to evaluate the publication bias of the included literature. If $P < 0.05$ , it is considered that the included literature has a publication bias. | 5-6 |

Page 1 of 2

| Section/topic                  | #  | PRISMA-DTA Checklist Item                                                                                                                                                                                                                                                                                                                                                                                                                                                                                                                                                                                                                                                                                                                                                                                              | Reported on page # |
|--------------------------------|----|------------------------------------------------------------------------------------------------------------------------------------------------------------------------------------------------------------------------------------------------------------------------------------------------------------------------------------------------------------------------------------------------------------------------------------------------------------------------------------------------------------------------------------------------------------------------------------------------------------------------------------------------------------------------------------------------------------------------------------------------------------------------------------------------------------------------|--------------------|
| Meta-analysis                  | D2 | Reference no. 14                                                                                                                                                                                                                                                                                                                                                                                                                                                                                                                                                                                                                                                                                                                                                                                                       |                    |
| Additional analyses            | 16 | We conducted subgroup analysis on the early-onset sepsis group, cutoff $> 2$ , and cutoff $< 2$ , respectively. The sensitivity analysis was performed by excluding premature infants, non-Asian, and late-onset sepsis to explore the heterogeneity, meta-regression analysis of year, region, Study type and birth status of newborn.                                                                                                                                                                                                                                                                                                                                                                                                                                                                                | 7-8                |
| <b>RESULTS</b>                 |    |                                                                                                                                                                                                                                                                                                                                                                                                                                                                                                                                                                                                                                                                                                                                                                                                                        |                    |
| Study selection                | 17 | Preliminary retrieval of 740 pieces of literature, after checking duplicates and reading abstracts, and excluding relevant literature according to the exclusion criteria, 13 studies were finally included. The specific process is shown in (Fig1).                                                                                                                                                                                                                                                                                                                                                                                                                                                                                                                                                                  | 6                  |
| Study characteristics          | 18 | The references were included from 2017 to 2021, with 1365 newborns, including 726 in the study group and 639 in the control group. Among them, 3 were late-onset sepsis, 5 were early-onset sepsis, and 2 were preterm infants. Ten studies are from Asia, and three studies are from non-Asia. Basic information of the included literature is shown in (Table 1).                                                                                                                                                                                                                                                                                                                                                                                                                                                    | 6                  |
| Risk of bias and applicability | 19 | The evaluation results of the risk of bias of the included studies are shown in (Fig2、3).                                                                                                                                                                                                                                                                                                                                                                                                                                                                                                                                                                                                                                                                                                                              | 7                  |
| Results of individual studies  | 20 | The research results are displayed in the form of tables and forest diagrams                                                                                                                                                                                                                                                                                                                                                                                                                                                                                                                                                                                                                                                                                                                                           |                    |
| Synthesis of results           | 21 | we found that the sensitivity and specificity of $I^2$ are respectively 68.61% and 90.87%. This indicates that there is considerable heterogeneity. We first conducted a threshold effect test. By using metadisc14.0, we found that the Spearman correlation coefficient was $-0.093$ $p = 0.762$ ( $p > 0.05$ ). Furthermore, the Proportion of heterogeneity is likely due to threshold effect = 0.23 in stata16.0. It shows no threshold effect heterogeneity, The pooled sensitivity and specificity of neutrophil to lymphocyte ratio in the diagnosis of neonates were 0.77 (95 % CI 0.71-0.83) and 0.86 (95 % CI 0.70-0.94), respectively; PLR was 5.6 (95 % CI 2.3-13.8), and NLR was 0.26 (95 % CI 0.19-0.37), DOR is 21(95 % CI 7-69), area under the curve (AUC) is 0.84(95 % CI 0.81-0.87) (Fig 4,5,6,7). | 7-8                |



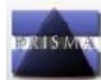

# PRISMA-DTA Checklist

1  
2  
3  
4  
5  
6  
7  
8  
9  
10  
11  
12  
13  
14  
15  
16  
17  
18  
19  
20  
21  
22  
23  
24  
25  
26  
27  
28  
29  
30  
31  
32  
33  
34  
35  
36  
37  
38  
39  
40  
41  
42  
43  
44  
45  
46  
47

|                     |    |                                                                                                                                                                                                                                                                                                                                                                                                                                                                                                                                                                                                                                                                                                                                                                                                                                                                                                                                                                                                                                                                                                                                                                                                                                                                                                                             |     |
|---------------------|----|-----------------------------------------------------------------------------------------------------------------------------------------------------------------------------------------------------------------------------------------------------------------------------------------------------------------------------------------------------------------------------------------------------------------------------------------------------------------------------------------------------------------------------------------------------------------------------------------------------------------------------------------------------------------------------------------------------------------------------------------------------------------------------------------------------------------------------------------------------------------------------------------------------------------------------------------------------------------------------------------------------------------------------------------------------------------------------------------------------------------------------------------------------------------------------------------------------------------------------------------------------------------------------------------------------------------------------|-----|
| Additional analysis | 23 | <p>The meta-regression results show that articles in non-Asian regions are the main source of heterogeneity (Table 2). Sensitivity analysis removes non-Asian, preterm, and late-onset sepsis research literature results also show that the region is the main source of heterogeneity. (Table 3)</p> <p>(1).The results of the EOS subgroup analysis showed that the pooled sensitivity and specificity of the neutrophil to lymphocyte ratio in the diagnosis of neonatal sepsis were 0.83 (95 % CI 0.68-0.91) and 0.99 (95 % CI 0.78-1.00); PLR was 91.3 (95 % CI 3.0-2823.6), NLR was 0.18 (95 % CI 0.09-0.34), DOR was 519 (95 % CI 14-19952), and the area under the curve (AUC) was 0.95 (95 % CI 0.93-0.97).</p> <p>(2).Cutoff value&gt;2, pooled sensitivity and specificity are respectively 0.83(95 % CI 0.66-0.93) and 0.80(95 % CI 0.44-0.95) respectively; PLR is 4.1(95 % CI 1.0-17.2), NLR is 0.21(95 % CI 0.07-0.60), DOR is 20 (95 % CI 2-218), the area under the curve (AUC) is 0.88 (95 % CI 0.85-0.91).</p> <p>(3).Cutoff value &lt;2, pooled sensitivity and specificity are respectively 0.74(95 % CI 0.69-0.78) and 0.90(95 % CI 0.71-0.97); PLR is 7.1(95 % CI 2.3-21.8), NLR is 0.29(95 % CI 0.23-0.36), DOR is 25(95 % CI 7-88) The area under the curve (AUC) is 0.77(95 % CI 0.73-0.81).</p> | 7-8 |
| <b>DISCUSSION</b>   |    |                                                                                                                                                                                                                                                                                                                                                                                                                                                                                                                                                                                                                                                                                                                                                                                                                                                                                                                                                                                                                                                                                                                                                                                                                                                                                                                             |     |
| Summary of evidence | 24 | <p>A total of 13 studies comprising 1365 newborns were involved in this meta-analysis. The pooled sensitivity of the ratio of in the diagnosis of neonatal sepsis was 0.77 (95 % confidence interval [CI]: 0.71-0.83), the pooled specificity was 0.86 (95 % CI 0.70-0.94), the positive likelihood ratio was 5.6(95 % CI 2.3-13.8), the negative likelihood ratio was 0.26(95 % CI 0.19-0.37), the diagnostic odds ratio was 21(95 % CI 7-69), area under the curve (AUC) was 0.84(95 % CI 0.81-0.87). The results show that the ratio of neutrophils to lymphocytes has moderate diagnostic value for neonatal sepsis.</p>                                                                                                                                                                                                                                                                                                                                                                                                                                                                                                                                                                                                                                                                                                | 8-9 |
| Limitations         | 25 | <p>(1). Although it is homogeneous to reduce the choice of bias applications, heterogeneity is still in the inclusive research. (2). The diagnosis of newborns will also have differences due to different researchers, which will result in false positive and false negative results for the diagnosis of neonatal sepsis, which in turn leads to bias. (3). A part of the included research is a retrospective study, so there may be a selection of research objects. (4). The included research comes from different countries, and newborns have different immunity in newborns of different races and gender.</p>                                                                                                                                                                                                                                                                                                                                                                                                                                                                                                                                                                                                                                                                                                    | 9   |
| Conclusions         | 26 | <p>The neutrophils to lymphocytes ratio is moderate diagnostic capacity with high sensitivity and specificity for diagnosing neonatal sepsis. It can provide a reference value for the early diagnosis of neonatal sepsis.</p>                                                                                                                                                                                                                                                                                                                                                                                                                                                                                                                                                                                                                                                                                                                                                                                                                                                                                                                                                                                                                                                                                              | 10  |
| <b>FUNDING</b>      |    |                                                                                                                                                                                                                                                                                                                                                                                                                                                                                                                                                                                                                                                                                                                                                                                                                                                                                                                                                                                                                                                                                                                                                                                                                                                                                                                             |     |
| Funding             | 27 | None                                                                                                                                                                                                                                                                                                                                                                                                                                                                                                                                                                                                                                                                                                                                                                                                                                                                                                                                                                                                                                                                                                                                                                                                                                                                                                                        |     |

Adapted From: McInnes MDF, Moher D, Thombs BD, McGrath TA, Bossuyt PM, The PRISMA-DTA Group (2018). Preferred Reporting Items for a Systematic Review and Meta-analysis of Diagnostic Test Accuracy Studies: The PRISMA-DTA Statement. JAMA. 2018 Jan 23;319(4):388-396. doi: 10.1001/jama.2017.19163.

For more information, visit: [www.prisma-statement.org](http://www.prisma-statement.org).

# BMJ Open

## The accuracy of the neutrophil to lymphocyte ratio for the diagnosis of neonatal sepsis: a systematic review and meta-analysis

|                                 |                                                                                                                                                                                                                                                                                                                                                                                                                                                                                                                                                                                                                                                                                                                                                                                              |
|---------------------------------|----------------------------------------------------------------------------------------------------------------------------------------------------------------------------------------------------------------------------------------------------------------------------------------------------------------------------------------------------------------------------------------------------------------------------------------------------------------------------------------------------------------------------------------------------------------------------------------------------------------------------------------------------------------------------------------------------------------------------------------------------------------------------------------------|
| Journal:                        | <i>BMJ Open</i>                                                                                                                                                                                                                                                                                                                                                                                                                                                                                                                                                                                                                                                                                                                                                                              |
| Manuscript ID                   | bmjopen-2021-060391.R2                                                                                                                                                                                                                                                                                                                                                                                                                                                                                                                                                                                                                                                                                                                                                                       |
| Article Type:                   | Original research                                                                                                                                                                                                                                                                                                                                                                                                                                                                                                                                                                                                                                                                                                                                                                            |
| Date Submitted by the Author:   | 01-Nov-2022                                                                                                                                                                                                                                                                                                                                                                                                                                                                                                                                                                                                                                                                                                                                                                                  |
| Complete List of Authors:       | xin, yu; Harbin Medical University Cancer Hospital, Department of Critical Care Medicine; First Affiliated Hospital of Harbin Medical University<br>Shao, Yunshuang; Qilu Hospital of Shandong University Qingdao<br>Mu, Wenjing; Harbin Medical University Cancer Hospital, Department of Critical Care Medicine<br>Li, Hongxu; Harbin Medical University Cancer Hospital, Department of Critical Care Medicine; First Affiliated Hospital of Harbin Medical University<br>Zhou, Yuxin; Harbin Medical University Cancer Hospital, Department of Critical Care Medicine; First Affiliated Hospital of Harbin Medical University<br>Wang, Changsong; Harbin Medical University Cancer Hospital, Department of Critical Care Medicine; First Affiliated Hospital of Harbin Medical University |
| <b>Primary Subject Heading</b>: | Diagnostics                                                                                                                                                                                                                                                                                                                                                                                                                                                                                                                                                                                                                                                                                                                                                                                  |
| Secondary Subject Heading:      | Infectious diseases, Intensive care, Paediatrics                                                                                                                                                                                                                                                                                                                                                                                                                                                                                                                                                                                                                                                                                                                                             |
| Keywords:                       | INFECTIOUS DISEASES, NEONATOLOGY, Diagnostic microbiology < INFECTIOUS DISEASES                                                                                                                                                                                                                                                                                                                                                                                                                                                                                                                                                                                                                                                                                                              |
|                                 |                                                                                                                                                                                                                                                                                                                                                                                                                                                                                                                                                                                                                                                                                                                                                                                              |

SCHOLARONE™  
Manuscripts



I, the Submitting Author has the right to grant and does grant on behalf of all authors of the Work (as defined in the below author licence), an exclusive licence and/or a non-exclusive licence for contributions from authors who are: i) UK Crown employees; ii) where BMJ has agreed a CC-BY licence shall apply, and/or iii) in accordance with the terms applicable for US Federal Government officers or employees acting as part of their official duties; on a worldwide, perpetual, irrevocable, royalty-free basis to BMJ Publishing Group Ltd ("BMJ") its licensees and where the relevant Journal is co-owned by BMJ to the co-owners of the Journal, to publish the Work in this journal and any other BMJ products and to exploit all rights, as set out in our [licence](#).

The Submitting Author accepts and understands that any supply made under these terms is made by BMJ to the Submitting Author unless you are acting as an employee on behalf of your employer or a postgraduate student of an affiliated institution which is paying any applicable article publishing charge ("APC") for Open Access articles. Where the Submitting Author wishes to make the Work available on an Open Access basis (and intends to pay the relevant APC), the terms of reuse of such Open Access shall be governed by a Creative Commons licence – details of these licences and which [Creative Commons](#) licence will apply to this Work are set out in our licence referred to above.

Other than as permitted in any relevant BMJ Author's Self Archiving Policies, I confirm this Work has not been accepted for publication elsewhere, is not being considered for publication elsewhere and does not duplicate material already published. I confirm all authors consent to publication of this Work and authorise the granting of this licence.

1 **The accuracy of the neutrophil to lymphocyte ratio for the diagnosis of neonatal**  
2 **sepsis: a systematic review and meta-analysis**

3 Yu Xin<sup>1,2</sup>, Yunshuang Shao<sup>3</sup>, Wenjing Mu<sup>1</sup>, Hongxu Li<sup>1,2</sup>, Yuxin Zhou<sup>1,2</sup>, Changsong  
4 Wang<sup>1,2\*</sup>

5 1.Department of Critical Care Medicine, Harbin Medical University Cancer Hospital,  
6 No. 150 Haping Rd, Nangang District, Harbin 150081, China.

7 2.Department of Critical Care Medicine, the First Affiliated Hospital of Harbin  
8 Medical University, Harbin, Heilongjiang Province 150001, China.

9 3.Department of Critical Care Medicine, QiLu Hospital of ShanDong University  
10 (QingDao), No. 758 Hefei Rd, Shibei District, Qingdao 266000, China.

11 \*Corresponding author:

12 Changsong Wang, MD E-mail: changsongwangicu@163.com

13 Department of Critical Care Medicine, the First Affiliated Hospital of Harbin Medical  
14 University, Harbin, Heilongjiang Province 150001, China.

15 Department of Critical Care Medicine, Harbin Medical University Cancer Hospital.  
16 No. 150 Haping Rd, Nangang District, Harbin 150081, China.

17  
18 Yu Xin, MS. E-mail: xy15774634247@163.com

19 Yunshuang Shao, MS. E-mail: 13644535692@163.com

1  
2  
3  
4 20 Wenjing Mu, MS. E-mail: m297932712@163.com  
5  
6

7 21 Hongxu Li, MS. E-mail: lihongxuicu@163.com  
8  
9

10 22 Yuxin Zhou, MS. E-mail: zhouyuxin77work@163.com  
11  
12  
13

14 23 **Abstract**  
15

16 24 **Objectives:** The purpose of this study was systematically and quantitatively to assess  
17  
18 25 the value of the neutrophil to lymphocyte ratio (NLR) for the diagnosis of neonatal  
19  
20 26 sepsis by systematic review and meta-analysis.  
21  
22  
23

24 27 **Design:** Systematic review and meta-analysis.  
25  
26  
27

28 28 **Methods:** Eight major databases, including The Cochrane, PubMed, Embase, Web of  
29  
30 29 Science, CNKI, Wanfang, China Biomedical Literature Database, and VIP Database,  
31  
32 30 were systematically searched for neutrophil to lymphocyte ratio diagnoses of neonatal  
33  
34 31 sepsis from inception to June 2022. Two investigators independently conducted the  
35  
36 32 literature search, screening, data extraction. And quality evaluation with the  
37  
38 33 QUADAS-2 checklist. Statistical analysis was performed using Review Manager 5.3,  
39  
40 34 Stata 16.0, R(version 3.6.0) and Meta-DISC1.4.  
41  
42  
43  
44  
45  
46  
47

48 35 **Results:** A total of 14 studies comprising 1499 newborns were included in this meta-  
49  
50 36 analysis. With a cut-off value ranging from 0.1 to 9.4, the pooled sensitivity of the  
51  
52 37 neutrophil to lymphocyte ratio in the diagnosis of neonatal sepsis was 0.74 (95%  
53  
54 38 confidence interval [CI]: 0.61-0.83), the pooled specificity was 0.88 (95% CI 0.73-  
55  
56 39 0.95), the positive likelihood ratio was 6.35(95% CI 2.6-15.47), the negative  
57  
58  
59  
60

1  
2  
3  
4 40 likelihood ratio was 0.30(95% CI 0.19-0.46), the diagnostic odds ratio was 12.88 (95%  
5  
6  
7 41 CI 4.47-37.08), area under the curve (AUC) was 0.87(95% CI 0.84-0.89). In the  
8  
9  
10 42 subgroup analysis of early-onset neonatal sepsis, the pooled sensitivity was 0.75 (95%  
11  
12 43 CI 0.47-0.91), the pooled specificity was 0.99 (95% CI 0.88-1.00), the positive  
13  
14 44 likelihood ratio was 63.3 (95% CI 5.7-696.8), the negative likelihood ratio was 0.26  
15  
16  
17 45 (95% CI 0.10-0.63), the diagnostic odds ratio was 247(95% CI 16-3785), and the area  
18  
19  
20 46 under the curve (AUC) was 0.97 (95% CI 0.95-0.98).

21  
22  
23 47 **Conclusions:** Our findings suggest that the neutrophil to lymphocyte ratio is a helpful  
24  
25  
26 48 indicator for the diagnosis of early neonatal sepsis, but it still needs to be combined  
27  
28  
29 49 with other laboratory tests and specific clinical manifestations.

30  
31  
32 50 **Keywords:** Sepsis, Newborn, Neutrophil to lymphocyte ratio, Meta-analysis  
33  
34  
35 51

### 36 37 52 **Strengths and limitations**

- 38  
39  
40 53 ● We conducted a comprehensive search of each literature database and formulated  
41  
42 54 detailed inclusion and ranking criteria to ensure the quantity and quality of the  
43  
44 55 included literature.
- 45  
46  
47 56 ● Subgroup analyses were performed according to sepsis type, study area, and cut-  
48  
49 57 off value as described in the methodology section of this study.
- 50  
51  
52 58 ● Our included articles lack more multicentre and large sample studies.
- 53  
54  
55 59 ● There may be other clinical and statistical heterogeneity in the included studies.
- 56  
57  
58 60

61

**62 Background**

63 Neonatal sepsis is a systemic inflammatory response syndrome caused by a bacterial  
64 infection in the neonatal stage. The clinical manifestations gradually surface in the  
65 whole body of the inflammatory response and finally progress into organ failure,  
66 leading to death. [1] Studies have shown that the morbidity of neonatal sepsis is 1 - 20  
67 % in newborns and is also the third highest after premature delivery and neonatal  
68 encephalopathy (perinatal asphyxia and trauma). [2] At present, neonatal sepsis is  
69 faced with insufficient diagnostic methods, resulting in the inability to guide clinical  
70 treatment in a timely manner, thereby affecting its therapeutic effect.

71 According to a survey, the global mortality rate of neonatal sepsis reached 1.0% to  
72 5.0%. [3] Early and precise identification of neonatal sepsis is crucial for slowing the  
73 progression of the disease and decreasing mortality. [4] Notwithstanding, there are  
74 many clinical biomarkers in the clinic for the diagnosis of neonatal sepsis, and due to  
75 the long time consumption, low diagnostic performance, and the rapid progress of the  
76 disease, missed identification of neonatal sepsis delays diagnosis and treatment,  
77 increasing the risk of death. [5]

78 The accurate identification of neonatal sepsis is critical to provide sufficient treatment  
79 time and improve clinical outcomes. In contrast, the NLR is an independent predictor  
80 in the clinic that has been widely used in various diseases, such as immune system  
81 diseases, tumours, and cancers. [6] Many studies have shown that the NLR is more

1  
2  
3  
4 82 reliable for diagnosing neonatal sepsis than neutrophil counts or lymphocyte counts  
5  
6  
7 83 alone. Nevertheless, there is still a dispute about diagnosing the effectiveness of  
8  
9  
10 84 neonatal sepsis. [7, 8]

11  
12 85 We assessed the accuracy as a biomarker for diagnosing neonatal sepsis in newborns  
13  
14  
15 86 by performing a systematic literature review and a meta-analysis, comparing the  
16  
17  
18 87 predictive value, and providing a reference for the clinical diagnosis of neonatal sepsis.  
19

20  
21  
22 88

## 23 89 **Methods**

24  
25  
26 90 The present meta-analysis was conducted and reported according to the Preferred  
27  
28  
29 91 Reporting Items for Systematic Reviews and Meta-analyses Statement (PRISMA).

30  
31 92 For details, see PRISMA-DTA for abstracts and PRISMA-DTA.  
32

## 33 93 **Patient and Public Involvement**

34  
35  
36 94 No patients were involved.  
37  
38

## 39 95 **Data source**

40  
41  
42 96 We searched the Cochrane, PubMed, Embase, Web of Science, CNKI, Wanfang,  
43  
44  
45 97 China Biomedical Literature Database, and VIP Database for studies on the diagnostic  
46  
47  
48 98 accuracy of neonatal sepsis published before June 2022. We used a combination of  
49  
50  
51 99 subject words and free words to search the study and the following keywords:  
52  
53  
54 100 "Neutrophil and lymphocyte ratio," "Infant," "Newborn," "Neonate," "sepsis,"  
55  
56  
57 101 "septicemia," "Neonatal Sepsis. "In addition, we checked the reference lists of each  
58  
59  
60



1  
2  
3  
4 102 of the primary studies to identify additional publications. The retrieval format is shown  
5  
6  
7 103 in (Additional file 1).

#### 104 **Study eligibility**

105 Inclusion criteria: (1). The purpose of the study was to evaluate or explore the  
106 diagnostic value of the neutrophil to lymphocyte ratio in neonatal sepsis. The case  
107 group included newborns with confirmed neonatal sepsis, and the control group  
108 included newborns with neonates without sepsis. The diagnostic gold standard is  
109 blood culture (4). It can directly or indirectly obtain the true positive, false positive,  
110 true negative, and false negative values of the neutrophil-lymphocyte ratio in the  
111 diagnosis of neonatal sepsis. The language is English or Chinese.

112 Exclusion criteria: (1) Being able to be extracted from the full text (2) Reviews,  
113 conference reports, individual cases, and animal experiments; (3) A duplicated study.

#### 114 **Data extraction and quality assessment**

115 Two authors(XY, SYS) independently conducted the literature screening, data  
116 extraction, and quality evaluation. In case of disagreement, the third author (MWJ)  
117 decided. extracted data from the included literature, including the year of publication,  
118 country of origin, study design, author, publication year, newborn birth situation,  
119 study location, sample size, case and control numbers, cut-off value, true positive  
120 value, false-positive value, false-negative value, true negative value, sensitivity, and  
121 specificity. We assess the quality of the Diagnostic Accuracy Studies-2 (QUADAS-2)  
122 checklist. We used Review Manager (version 5.3) for quality assessment.

## 123 **Statistical analyses**

124 Statistical heterogeneity was assessed using forest plots with 95% prediction interval,  
125 the tau-squared ( $\tau^2$ ) value and  $I^2$  statistic. The 95% prediction interval was applied to  
126 estimate the effect size range in further studies<sup>[9]</sup>. If there was heterogeneity between  
127 the studies, the source of the heterogeneity was further explored, and threshold effect  
128 and nonthreshold effect analyses were carried out. Meta Disc1.4 software was used to  
129 analyze the threshold effect heterogeneity. For heterogeneity caused by non-threshold  
130 effects, we performed meta-regression analysis and sensitivity analysis to find the  
131 source of heterogeneity. At the same time, we performed subgroup analyses by cut-  
132 off value, neonatal birth status, and type of sepsis to assess the stability of the results.  
133 The combined sensitivity, combined specificity, combined diagnostic odds ratio  
134 (DOR), combined positive likelihood ratio (LR+), combined negative likelihood  
135 ratio(LR-), and its 95% confidence interval (95% CI) were determined using Stata  
136 16.0. Simultaneously, summary receiver operating characteristic (SROC) curve  
137 analysis was performed. All studies are presented as a circle and plotted with the  
138 SROC curve. The summary point is represented by a dot which was surrounded by a  
139 95% confidence region. The area under the SROC curve was calculated. At the same  
140 time, we assessed the bias of included studies by contour-enhanced funnel plots. If  
141 there was bias, we judged the stability of the results by the cut-and-fill method. We  
142 used Stata (version 16.0), R(version 3.6.0) and MetaDiSc (version 1.4) to perform the  
143 analyses.

## 144 **Results**

### 145 **Identification of studies**

146 After checking duplicates and reading abstracts and excluding relevant literature  
147 according to the exclusion criteria, a final total of 14 studies were used for the current  
148 meta-analysis. [10-23] The specific process is shown in Fig 1. Of these, 783 neonates  
149 in the sepsis group and 716 neonates in the nonsepsis group were studied and evaluated.  
150 (Additional file 2) shows the significant characteristics of the selected studies. The  
151 baseline information included the following parameters: the number of patients,  
152 gestational age, regions, types of sepsis, disease diagnosis methods, study design, and  
153 NLR cut-off value.

### 154 **Quality of studies**

155 We imported the literature into Review Manager 5.3 and used the QUADAS-2 tool to  
156 evaluate the quality of the 14 included references. According to the methodological  
157 evaluation results, the gold standard for the diagnosis of all patients is blood culture.  
158 For patient selection, three references were considered high risk. Since most studies  
159 do not specify a threshold in advance, there may be a risk of bias. Most articles did  
160 not mention whether the interpretation of the experimental results to be evaluated was  
161 performed without knowing the results of the gold standard, indicating that it is not  
162 clear whether the interpretation of the results will produce a risk of bias. (Figs. 2, 3)

### 163 **Heterogeneity exploration**

1  
2  
3  
4 164 Since the heterogeneity of diagnostic meta-analysis is widespread, it is mainly  
5  
6  
7 165 composed of threshold effect heterogeneity and nonthreshold effect heterogeneity.  
8  
9  
10 166 Through the combination of data, by combining the data we found that the results were  
11  
12 167 highly heterogeneous, We first conducted a threshold effect test. By using metadisc1.4,  
13  
14  
15 168 we found that the Spearman correlation coefficient was  $-0.037$  ( $p= 0.899$ ) ( $p>0.05$ ). It  
16  
17  
18 169 shows no threshold effect heterogeneity, so to further find the source of heterogeneity,  
19  
20  
21 170 we carried out meta-regression and sensitivity analysis. In the meta-regression  
22  
23  
24 171 analysis, we used the publication year (with 2019 as the cut-off), region, study type,  
25  
26  
27 172 and neonatal birth status as variables for analysis. The meta-regression results show  
28  
29  
30 173 that articles in prospective studies are the main source of heterogeneity( $p=0.01$ )  
31  
32 174 (Additional file 3). Sensitivity analysis removes non-Asian, preterm, and late-onset  
33  
34 175 sepsis research results and shows that the region is the main source of heterogeneity.  
35  
36  
37 176 (Additional file 4).

### 177 **Data synthesis and Subgroup analysis**

178 With a cut-off value ranging from 0.1 to 9.4, the pooled sensitivity and specificity of  
179 the NLR in the diagnosis of neonates were 0.74 (95% CI 0.61-0.83) and 0.88 (95% CI  
180 0.73-0.95), respectively;  $LR^+$  was 6.35 (95% CI 2.5-15.47),  $LR^-$  was 0.30 (95% CI  
181 0.19-0.46), DOR was 12.88 (95% CI 4.47-37.08), and area under the curve (AUC)  
182 was 0.87 (95% CI 0.84-0.89) (Figs. 4, 5, 6, 7).

183 The results of the EOS subgroup analysis showed that the pooled sensitivity and  
184 specificity of the NLR in the diagnosis of neonatal sepsis were 0.75 (95% CI 0.47-

1  
2  
3  
4 185 0.91) and 0.99 (95% CI 0.88-1.00); LR<sup>+</sup> was 63.3 (95% CI 5.7-696.8), LR<sup>-</sup> was 0.26  
5  
6  
7 186 (95% CI 0.10-0.63), DOR was 247 (95% CI 16-3785), and the area under the curve  
8  
9  
10 187 (AUC) was 0.97 (95% CI 0.95-0.98). The results of the LOS subgroup analysis  
11  
12 188 showed that the pooled sensitivity and specificity of the NLR in the diagnosis of  
13  
14  
15 189 neonatal sepsis were 0.60 (95% CI 0.53-0.67) and 0.85 (95% CI 0.80-0.90); LR<sup>+</sup> was  
16  
17  
18 190 3.71 (95% CI 2.73-5.02), LR<sup>-</sup> was 0.41 (95% CI 0.08-1.94), DOR was 11.14 (95% CI  
19  
20 191 6.54-18.98), and the area under the curve (AUC) was 0.85. Cut-off value: 0-2, pooled  
21  
22  
23 192 sensitivity and specificity were 0.74(95% CI 0.69-0.78) and 0.90(95% CI 0.71-0.97),  
24  
25  
26 193 respectively; LR<sup>+</sup> was 7.1(95% CI 2.3-21.8), LR<sup>-</sup> was 0.29(95% CI 0.23-0.36), DOR  
27  
28 194 was 25 (95% CI 7-88), the area under the curve (AUC) was 0.77. Cut-off value: 2-4,  
29  
30  
31 195 pooled sensitivity and specificity were 0.79(95% CI 0.72-0.85) and 0.62(95% CI 0.54-  
32  
33  
34 196 0.70); LR<sup>+</sup> was 2.21(95% CI 1.24-3.92), LR<sup>-</sup> was 0.33(95% CI 0.23-0.46), DOR was  
35  
36  
37 197 6.73(95% CI 2.81-16.14) The area under the curve (AUC) was 0.85. Cut-off value: >4,  
38  
39  
40 198 pooled sensitivity and specificity were 0.60(95% CI 0.53-0.67) and 0.91(95% CI 0.85-  
41  
42 199 0.95); LR<sup>+</sup> was 9.0(95% CI 0.3-270.24), LR<sup>-</sup> was 0.29(95% CI 0.03-2.68), DOR was  
43  
44  
45 200 31.51(95% CI 0.81-1229.29) The area under the curve (AUC) was 0.95.(Additional  
46  
47  
48 201 file 5)

## 202 **Publication bias exploration**

203 The contour-enhanced funnel plot results suggested that there was publication bias,  
204 and after our cut-and-fill method, the results showed that the stability of our meta-  
205 analysis results was not affected.. (Fig. 8)

## 206 Discussion

207 The early identification of neonatal sepsis remains challenging in the clinic, and the  
208 NLR is broadly used in diagnosing immune system diseases, tumours, and cancers.  
209 However, the accurate diagnosis of neonatal sepsis is still questionable. [24,25,26] For  
210 the first time, we conducted a meta-analysis and systematic review of the diagnostic  
211 performance of NLR in neonatal sepsis, which may provide a better reference value  
212 for the early diagnosis of neonatal sepsis and for NLR to diagnose neonatal sepsis,  
213 providing evidence-based evidence.. The meta-analysis included all 14 studies from 7  
214 nations, including 1499 patients with neonatal sepsis. Moreover, the results revealed  
215 that the combined AUC of the NLR in the diagnosis of neonatal sepsis was 0.874 (95%  
216 CI=0.84, 0.89), showing that the NLR is a helpful indicator for the diagnosis of early  
217 neonatal sepsis.

218 Omran A et al. found that NLR is closely related to neonatal sepsis. Within a few  
219 hours after neonatal sepsis, NLR can rapidly increase in a short time compared to CRP.  
220 The use of NLR makes it possible to identify neonatal sepsis early [27] can be used as  
221 an auxiliary diagnostic index for the diagnosis of neonatal sepsis, [28] timely diagnosis  
222 and early appropriate antibiotic treatment. Seymour CW et al. showed that in the ROC  
223 curve analysis of bacterial sepsis according to the Sepsis-2 standard, NLR showed a  
224 moderate AUC (0.68), which was significantly higher than that of CRP, lactate and  
225 PCT, [29, 30] suggesting that NLR has better diagnostic performance. Mahmoud  
226 NMSA et al. found that when the cut-off value was 0.1, NLR showed the best

1  
2  
3  
4 227 specificity and negative predictive value for neonatal sepsis (SPE was 99%, NPV was  
5  
6  
7 228 75%), compared with CRP and PCT, NLR showed higher specificity with better  
8  
9  
10 229 diagnostic power. [19] A study by Alkan Ozdemir S et al. in the diagnosis of late-  
11  
12 230 onset neonatal sepsis showed that NLR had a high sensitivity, specificity, and  
13  
14  
15 231 accuracy of 0.73, 0.78, and 0.76 respectively, with an NLR cut-off value of 1.77.[11]  
16  
17  
18 232 In the study of Goldberg O, it was found that the cut-off value of NLR was 1.5, and  
19  
20 233 NLR could be used as a single laboratory index to diagnose neonatal sepsis, [13]  
21  
22  
23 234 indicating that NLR could be a valuable indicator to exclude neonatal sepsis.  
24  
25  
26 235 Subgroup analysis indicated that pooled sensitivity and specificity were higher for  
27  
28 236 detecting the NLR in a group of early-onset neonatal sepsis. The results express the  
29  
30  
31 237 stability of the results. Neonatal early-onset sepsis mainly emphasizes that the bacteria  
32  
33  
34 238 originate from intrauterine tissue and during delivery, and the spectrum of pathogenic  
35  
36  
37 239 bacteria is relatively concentrated. [31, 32] Streptococcus B and Escherichia coli are  
38  
39  
40 240 the most common pathogens of early-onset neonatal sepsis. In the future, more  
41  
42 241 research can be incorporated to further verify the accuracy of the NLR diagnosis of  
43  
44  
45 242 early-onset sepsis.  
46  
47  
48 243 Our study included homogeneous research as much as possible, but the included  
49  
50 244 studies still had heterogeneity in which nonthreshold effects can be explained to partial  
51  
52  
53 245 heterogeneity. The results of the meta-regression analysis indicated that the study type  
54  
55  
56 246 may be the main sources of heterogeneity. (Additional file 3). The sensitive analysis  
57  
58  
59 247 results also indicate that the non-Asian region is the primary source of heterogeneity  
60

1  
2  
3  
4 248 (Additional file 4). However, after removing all non-Asian articles, heterogeneity still  
5  
6  
7 249 existed, indicating this study's heterogeneity is for other reasons.

8  
9 250 In addition, several limitations of this study should be noted. (1). Although it is  
10  
11  
12 251 homogeneous to reduce the choice of bias applications, heterogeneity is still in the  
13  
14  
15 252 inclusive research. (2). The diagnosis of newborns will also have differences due to  
16  
17  
18 253 different researchers, resulting in false positive and false negative results for the  
19  
20  
21 254 diagnosis of neonatal sepsis, which leads to bias. (3). A part of the included research  
22  
23  
24 255 was a retrospective study, so there may be a selection of research objects. (4). The  
25  
26  
27 256 included research comes from different countries, and newborns have different  
28  
29  
30 257 immunity for different races and sexes. Therefore, it is necessary to carry out the same  
31  
32  
33 258 race, large sample, multicentre prospective clinical study to determine value of the  
34  
35  
36 259 NLR in diagnosing neonatal sepsis in the future.

37 260

## 38 39 261 **Conclusion**

40  
41  
42  
43 262 In summary, our findings suggest that the neutrophil to lymphocyte ratio is a helpful  
44  
45  
46 263 indicator for the diagnosis of early neonatal sepsis, but it still needs to be combined  
47  
48  
49 264 with other laboratory tests and specific clinical manifestations. However, it is limited  
50  
51  
52 265 to the research site and research type. Further research is needed to carry out  
53  
54  
55 266 multicentre prospective studies with multiple samples to verify the accuracy of  
56  
57  
58 267 neutrophil to lymphocyte ratio (NLR) diagnosis and improve neonatal sepsis  
59  
60 268 prognosis.



269

**270 Abbreviations**

271 NLR: neutrophil to lymphocyte ratio; QUADAS-2: Quality Assessment of Diagnostic  
272 Accuracy Studies-2; CI: confidence interval; SEN: sensitivity; SPE: specificity; LR<sup>-</sup>:  
273 negative likelihood ratio; LR<sup>+</sup>: positive likelihood ratio; DOR: diagnostic odds ratio;  
274 TP: true positive; FP: false positive; TN: true negative; FN: false negative; EOS: early-  
275 onset sepsis; LOS: late-onset sepsis; AUC: area under the curve; SROC: summary  
276 receiver operating characteristic.

**277 Contributors**

278 XY wrote the manuscript. LHX, ZYX, and MWJ performed the literature review. XY  
279 and SYS performed the statistical analysis. MWJ and WCS revised the text. All  
280 authors read and approved the final manuscript.

**281 Author Details**

282 1. Department of Critical Care Medicine, Harbin Medical University Cancer Hospital,  
283 No. 150 Haping Rd., Nangang District, Harbin 150081, China.

284 2. Department of Critical Care Medicine, the First Affiliated Hospital of Harbin  
285 Medical University, Harbin, Heilongjiang Province 150001, China.

286 3. Department of Critical Care Medicine, QiLu Hospital Of ShanDong University  
287 (QingDao), No. 758 Hefei Rd, Shibei District, Qingdao 266000, China.

288 **Acknowledgments:** Not applicable.

289 **Competing interests:** The authors declare that they have no competing interests.

1  
2  
3  
4 290 **Availability of data and materials:** No data are available.  
5

6  
7 291 **Consent for publication:** Not applicable.  
8  
9

10 292 **Ethics approval statement:** No animal or human participant was involved in this  
11  
12  
13 293 study.  
14  
15

16  
17 294 **Funding:** None.  
18  
19

20 295

21  
22 296 **Reference**  
23

24  
25 297 [1] Du Lizhong.Challenges in diagnosis and prevention of neonatal sepsis, *Chin J*  
26  
27 298 *Pediatr*,2019 ; 57(04): p. 241-243.  
28  
29

30 299 [2] Global, regional, and national life expectancy, all-cause mortality, and cause-  
31  
32 300 specific mortality for 249 causes of death, 1980-2015: a systematic analysis for the  
33  
34 301 Global Burden of Disease Study 2015. *Lancet*, 2016. 388(10053): p. 1459-1544.  
35  
36  
37

38  
39 302 [3] Oza, S.Neonatal cause-of-death estimates for the early and late neonatal periods  
40  
41 303 for 194 countries: 2000-2013. *Bull World Health Organ*, 2015. 93(1): p. 19-28.  
42  
43

44 304 [4] Brodska, H.Diagnostic and prognostic value of presepsin vs. established  
45  
46 305 biomarkers in critically ill patients with sepsis or systemic inflammatory response  
47  
48 306 syndrome. *Clinical Chemistry and Laboratory Medicine (CCLM)*, 2018. 56(4): p. 658-  
49  
50 307 668.  
51  
52

53  
54  
55 308 [5] Li wei.Expert consensus on the diagnosis and management of neonatal sepsis  
56  
57 309 (version 2019),*Chin J Pediatr*,2019.57(4):p.252-257.  
58  
59  
60

- 1  
2  
3  
4 310 [6] Gong W, Yang S, Yang X, et al. Blood preoperative neutrophil-to-lymphocyte ratio  
5  
6  
7 311 is correlated with TNM stage in patients with papillary thyroid cancer[J]. *Clinics*, 2016,  
8  
9  
10 312 71(6):311-314.
- 11  
12 313 [7] Kumarasamy C, Sabarimurugan S, Madurantakam R M, et al. Prognostic  
13  
14  
15 314 significance of blood inflammatory biomarkers NLR, PLR, and LMR in cancer—A  
16  
17  
18 315 protocol for systematic review and meta-analysis[J]. *Medicine*, 2019, 98(24): e14834.
- 19  
20 316 [8] Mariaelena C, Diana G, Domenico M, et al. Baseline neutrophil-to-lymphocyte  
21  
22  
23 317 ratio (NLR) and derived NLR could predict overall survival in patients with advanced  
24  
25  
26 318 melanoma treated with nivolumab[J]. *Journal for Immunotherapy of Cancer*, 2018,  
27  
28  
29 319 6(1):74.
- 30  
31 320 [9] Borenstein M. Research Note: In a meta-analysis, the  $I^2$  index does not tell us how  
32  
33  
34 321 much the effect size varies across studies. *J Physiother*. 2020 Apr;66(2):135-139.
- 35  
36 322 [10] Ruslie R H, Tjipta D G, Samosir C T, et al. Bacterial pattern, and role of  
37  
38  
39 323 laboratory parameters as marker for neonatal sepsis[C]//IOP Conference Series: Earth  
40  
41  
42 324 and Environmental Science. *IOP Publishing*, 2018, 125(1): 012057.
- 43  
44  
45 325 [11] Alkan Ozdemir S, S, Arun Ozer E, Ilhan O, et al. Can neutrophil to lymphocyte  
46  
47  
48 326 ratio predict late-onset sepsis in preterm infants?[infants? [J]. *Journal of Clinical*  
49  
50  
51 327 *Laboratory Analysis*, 2017:e22338.
- 52  
53 328 [12] Goldberg O, Amitai N, Chodick G, et al. Can we improve early identification of  
54  
55  
56 329 neonatal late-onset sepsis? A validated prediction model[J]. *Journal of Perinatology*,  
57  
58  
59 330 2020, 40(9): p. 1315-1322.  
60

- 1  
2  
3  
4 331 [13] Wilar R. Diagnostic value of eosinopenia and neutrophil to lymphocyte ratio on  
5  
6 332 early onset neonatal sepsis[J]. *Korean Journal of Pediatrics*, 2018, 62(6): p. 217-223.  
7  
8  
9 333 [14] Sumitro KR, Utomo MT, WidodoA. Neutrophil-to-Lymphocyte Ratio as an  
10  
11 334 Alternative Marker of Neonatal Sepsis in Developing Countries[J]. *Oman Medical*  
12  
13 335 *Journal*, 2021, 36(1):e214-e214.  
14  
15  
16  
17 336 [15] Du xiaoyu,Ai liang. Changes and clinical significance of NLR, CRP and PCT in  
18  
19 337 neonates with sepsis. *Experimental and Laboratory Medicine*,2019.37(01): p.110-112.  
20  
21  
22  
23 338 [16] Zhang, S.J. Platelet-to-Lymphocyte and Neutrophil-to-Lymphocyte Ratio as  
24  
25 339 Predictive Biomarkers for Early-onset Neonatal Sepsis. *Jcsp-Journal of the College*  
26  
27 340 *of Physicians and Surgeons Pakistan*, 2021. 31(7): p. 821-824.  
28  
29  
30  
31 341 [17] Panda S K, Nayak M K, Rath S, et al. The Utility of the Neutrophil-Lymphocyte  
32  
33 342 Ratio as an Early Diagnostic Marker in Neonatal Sepsis[J]. *Cureus*, 2021, 13(1):  
34  
35 343 e12891.  
36  
37  
38  
39 344 [18] E.C, H.S,C.C,et al. The Value of Neutrophil to Lymphocyte Ratio and Platelet to  
40  
41 345 Lymphocyte Ratio for Detecting Early-onset Neonatal Sepsis. *Journal of pediatric*  
42  
43 346 *hematology/oncology*, 2018. 40(4) E229-E232.  
44  
45  
46  
47 347 [19] Mahmoud N M S A, Baheeg G, Abdelhakeem M, et al. Platelet to Lymphocyte  
48  
49 348 Ratio and Neutrophil to Lymphocyte Ratio as New Diagnostic Markers for Detection  
50  
51 349 of Early-onset Neonatal Sepsis in Full-term Newborns. 2019.  
52  
53  
54  
55  
56  
57  
58  
59  
60

- 1  
2  
3  
4 350 [20] Mira S M, Alkhalegy H A, Abd-Elraheem S I, et al. Neutrophil and Platelet to  
5  
6  
7 351 Lymphocyte Ratio for Detecting Early-onset Neonatal Sepsis[J]. *International*  
8  
9  
10 352 *Journal of Medical Arts*, 2021, 3(2): 1274-1281.
- 11  
12 353 [21] Varal I,Dogan P. Can neutrophil-lymphocyte ratio be a predictor of late-onset  
13  
14  
15 354 sepsis in preterm infants? [J]. *Annals of Medical Research*, 2020, 27(1):23.
- 16  
17  
18 355 [22] Lim, H.Sukmawati.M, Artana.W. D,et al. Validity of neutrophil lymphocyte  
19  
20  
21 356 count ratio in neonatal sepsis. *International Journal of Health Sciences*, (2021).5(2),  
22  
23 357 53-61.
- 24  
25  
26 358 [23] Kurt A, Tosun MS, Altuntaş N: Diagnostic accuracy of complete blood cell count  
27  
28  
29 359 and neutrophil-to-lymphocyte, lymphocyte-to-monocyte, and platelet-to-lymphocyte  
30  
31  
32 360 ratios for neonatal infection. *Asian Biomedicine* 2022, 16(1):43-52.
- 33  
34  
35 361 [24] Bakhuizen, S.E.Meta -analysis shows that infants who have suffered neonatal  
36  
37  
38 362 sepsis face an increased risk of mortality and severe complications. *Acta Paediatrica*,  
39  
40  
41 363 2014. 103(12): p. 1211-1218.
- 42  
43  
44 364 [25] Shabuj K H, Hossain J, Moni S C, et al.C-reactive protein (CRP) as a single  
45  
46  
47 365 biomarker for diagnosis of neonatal sepsis: a comprehensive meta-analysis.  
48  
49  
50 366 *Mymensingh Med J*, 2017. 26(2): p. 364-371.
- 51  
52  
53 367 [26] Rich é, F. Reversal of neutrophil-to-lymphocyte count ratio in early versus late  
54  
55  
56 368 death from septic shock. *Critical Care*, 2015. 19(1): p. 1-10.
- 57  
58  
59 369 [27] Makkar M, Gupta C, Pathak R et al. Performance evaluation of hematologic  
60  
370 scoring system in early diagnosis of neonatal sepsis. *J Clin Neonatol*. 2013;2:25–9.

1  
2  
3  
4 371 [28] Omran A, Maarroof A, Saleh MH et al. Salivary C-reactive protein, mean platelet  
5  
6  
7 372 volume and neutrophil lymphocyte ratio as diagnostic markers for neonatal sepsis. J  
8  
9 373 *Pediatr.*2018;94:82–7.

10  
11  
12 374 [29] Seymour CW, Gesten F, Prescott HC et al. Time to Treatment and Mortality  
13  
14  
15 375 during Mandated Emergency Care for Sepsis. *N Engl J Med.* 2017; 376(23):2235–44.

16  
17  
18 376 [30] Ljungström L, Pernestig AK, Jacobsson Get al. Diagnostic accuracy of  
19  
20  
21 377 procalcitonin, neutrophil-lymphocyte count ratio, C-reactive protein, and lactate in  
22  
23  
24 378 patients with suspected bacterial sepsis. *PLoS One.* 2017 Jul 20;12(7): e0181704.

25  
26  
27 379 [31] Stoll B J, Hansen N I, Higgins R D, et al. Very low birth weight preterm infants  
28  
29  
30 380 with early onset neonatal sepsis: the predominance of gram-negative infections  
31  
32  
33 381 continues in the National Institute of Child Health and Human Development Neonatal  
34  
35  
36 382 Research Network, 2002–2003. *The Pediatric infectious disease journal*, 2005. 24(7):  
37  
38  
39 383 p. 635-639.

40  
41 384 [32] McIntire.D.D,K.J. Leveno. Neonatal mortality and morbidity rates in late preterm  
42  
43  
44 385 births compared with births at term. *Obstetrics & Gynecology*, 2008. 111(1): p. 35-41.

45  
46  
47 386

48  
49 387 **Figure legends:**

50  
51  
52 388 Figure 1: Flowchart of study selection, inclusion, and exclusion for the meta-analysis

53  
54  
55 389 Figure 2: Risk of bias and applicability concerns summary

56  
57  
58 390 Figure 3: Risk of bias and applicability concerns graph

59  
60

1  
2  
3  
4  
5  
6  
7  
8  
9  
10  
11  
12  
13  
14  
15  
16  
17  
18  
19  
20  
21  
22  
23  
24  
25  
26  
27  
28  
29  
30  
31  
32  
33  
34  
35  
36  
37  
38  
39  
40  
41  
42  
43  
44  
45  
46  
47  
48  
49  
50  
51  
52  
53  
54  
55  
56  
57  
58  
59  
60

391 Figure 4: Forest plot of the pooled sensitivity and specificity

392 Figure 5: Forest plot of the pooled diagnostic odds ratio

393 Figure 6: Forest plot of the pooled positive LR and negative LR

394 Figure 7: SROC of the neutrophil to lymphocyte ratio for the diagnosis of sepsis

395 Figure 8: Contour-enhanced funnel plot of studies included in the meta-analysis

396

397 **Additional file legends:**

398 Additional file 1: Detailed literature search strategy

399 Additional file 2: Characteristics of the included 14 studies

400 Additional file 3: The result of meta-regression.

401 Additional file 4: The results of sensitivity analysis.

402 Additional file 5: Subgroup analysis of neutrophil-to-lymphocyte ratio in the diagnosis

403 of neonatal sepsis



Flowchart of study selection, inclusion, and exclusion for the meta-analysis

254x253mm (144 x 144 DPI)



|                            | <u>Risk of Bias</u> |            |                    |                 | <u>Applicability Concerns</u> |            |                    |
|----------------------------|---------------------|------------|--------------------|-----------------|-------------------------------|------------|--------------------|
|                            | Patient Selection   | Index Test | Reference Standard | Flow and Timing | Patient Selection             | Index Test | Reference Standard |
| Abdullah Kurt 2022         | +                   | +          | ?                  | +               | +                             | +          | +                  |
| Emrah Can, MD2017          | +                   | +          | ?                  | +               | +                             | +          | +                  |
| Heriyanto Lim2021          | +                   | -          | ?                  | +               | +                             | +          | +                  |
| Ipek Guney Varal2020       | +                   | -          | +                  | +               | +                             | +          | +                  |
| Khadijah Rizky Sumitro2021 | -                   | -          | ?                  | +               | +                             | +          | +                  |
| Nagwa Mohamed,SAM2020      | +                   | -          | +                  | +               | +                             | +          | +                  |
| Ori Goldberg2020           | +                   | -          | ?                  | +               | +                             | +          | +                  |
| R H Ruslie2018             | -                   | -          | ?                  | +               | +                             | +          | +                  |
| Rocky Wilar, MD2018        | +                   | -          | ?                  | +               | +                             | +          | +                  |
| Santosh K. Panda2021       | +                   | +          | ?                  | +               | +                             | +          | +                  |
| Sara Mohamed Mira2021      | +                   | -          | ?                  | +               | +                             | +          | +                  |
| Senem Alkan Ozdemir2017    | -                   | -          | ?                  | +               | +                             | +          | +                  |
| Shujian Zhang 2021         | +                   | -          | ?                  | +               | +                             | +          | ?                  |
| Xiaoyu Du2019              | +                   | -          | ?                  | -               | +                             | ?          | ?                  |

  

|                                                                                                 |                                                                                                    |                                                                                                |
|-------------------------------------------------------------------------------------------------|----------------------------------------------------------------------------------------------------|------------------------------------------------------------------------------------------------|
|  <b>High</b> |  <b>Unclear</b> |  <b>Low</b> |
|-------------------------------------------------------------------------------------------------|----------------------------------------------------------------------------------------------------|------------------------------------------------------------------------------------------------|

Risk of bias and applicability concerns summary

228x309mm (144 x 144 DPI)

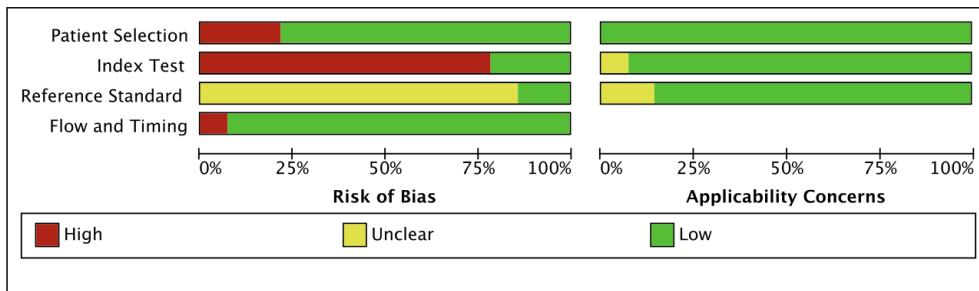

Risk of bias and applicability concerns graph

229x70mm (144 x 144 DPI)



Forest plot of the pooled sensitivity and specificity

445x323mm (144 x 144 DPI)

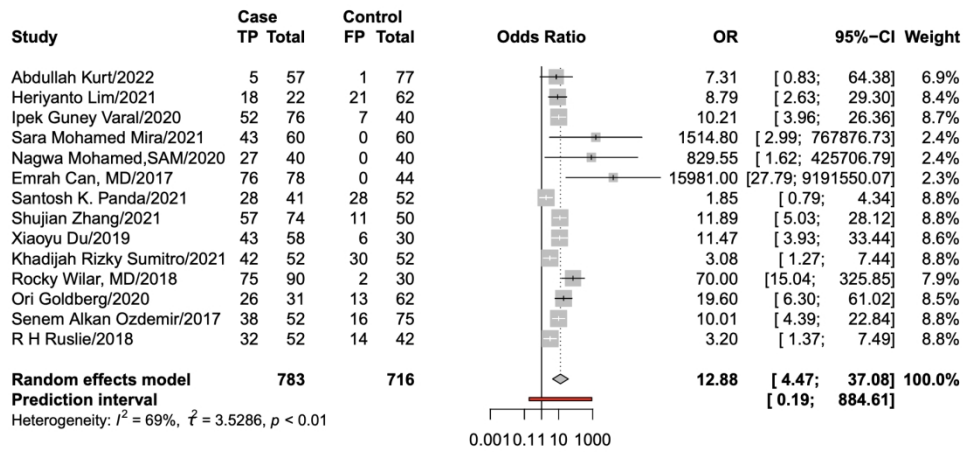

Forest plot of the pooled diagnostic odds ratio

343x165mm (144 x 144 DPI)

1  
2  
3  
4  
5  
6  
7  
8  
9  
10  
11  
12  
13  
14  
15  
16  
17  
18  
19  
20  
21  
22  
23  
24  
25  
26  
27  
28  
29  
30  
31  
32  
33  
34  
35  
36  
37  
38  
39  
40  
41  
42  
43  
44  
45  
46  
47  
48  
49  
50  
51  
52  
53  
54  
55  
56  
57  
58  
59  
60

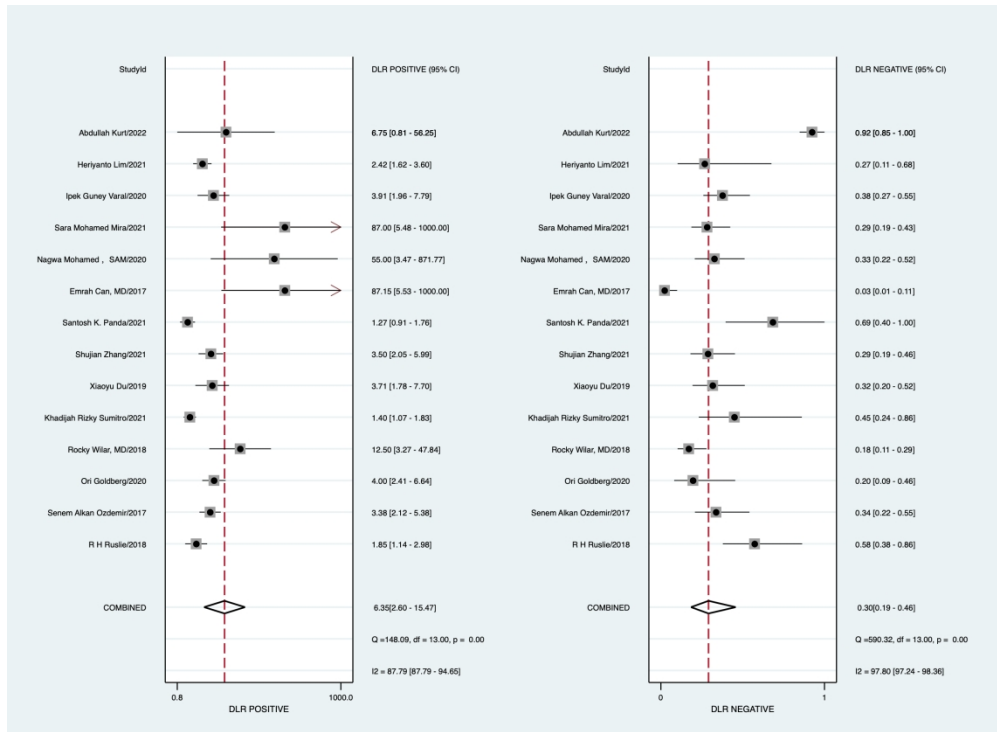

Forest plot of the pooled positive LR and negative LR

445x323mm (144 x 144 DPI)

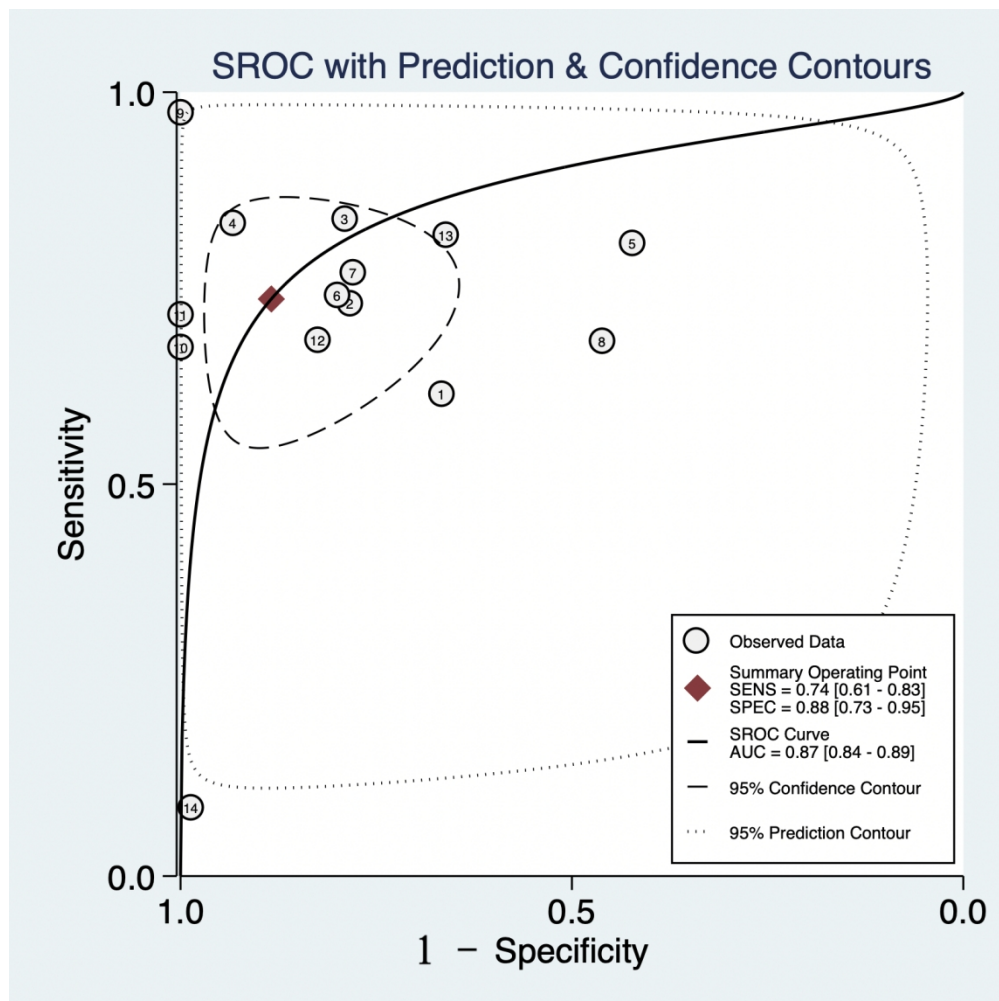

SROC of the neutrophil to lymphocyte ratio for the diagnosis of sepsis

288x287mm (144 x 144 DPI)

1  
2  
3  
4  
5  
6  
7  
8  
9  
10  
11  
12  
13  
14  
15  
16  
17  
18  
19  
20  
21  
22  
23  
24  
25  
26  
27  
28  
29  
30  
31  
32  
33  
34  
35  
36  
37  
38  
39  
40  
41  
42  
43  
44  
45  
46  
47  
48  
49  
50  
51  
52  
53  
54  
55  
56  
57  
58  
59  
60

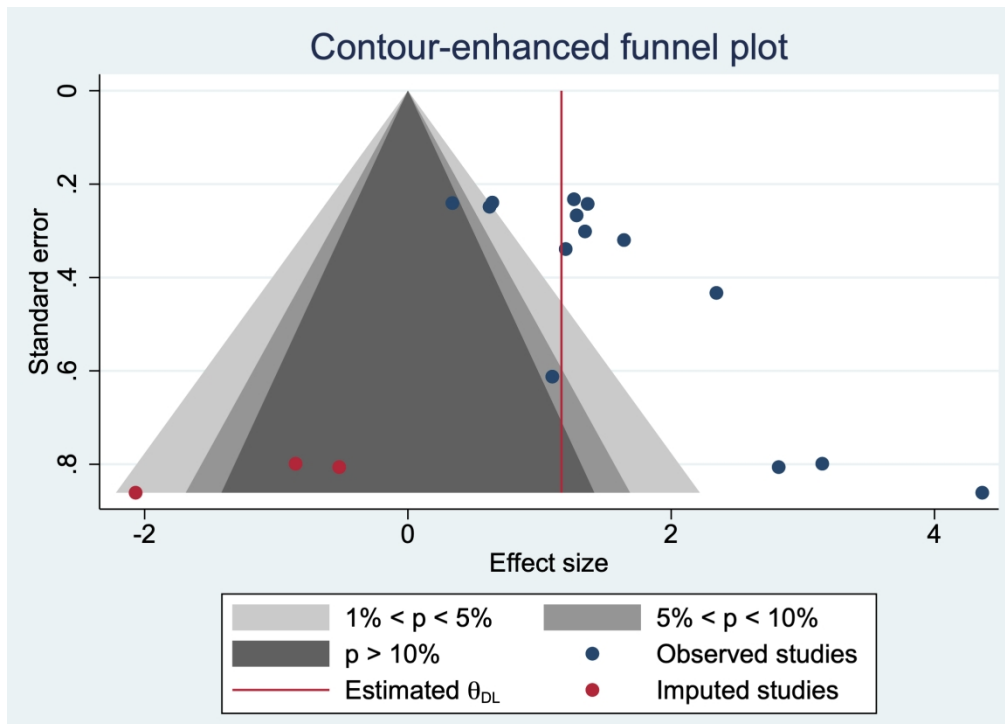

Contour-enhanced funnel plot of studies included in the meta-analysis

404x292mm (144 x 144 DPI)

## Detailed retrieval strategy

|                       |                                                                                                                                                                                                                                                                                                                                                                                                                                                                                                                                                                                                                                                                                                                                                                                                                                                                                                                     |
|-----------------------|---------------------------------------------------------------------------------------------------------------------------------------------------------------------------------------------------------------------------------------------------------------------------------------------------------------------------------------------------------------------------------------------------------------------------------------------------------------------------------------------------------------------------------------------------------------------------------------------------------------------------------------------------------------------------------------------------------------------------------------------------------------------------------------------------------------------------------------------------------------------------------------------------------------------|
| <b>Database</b>       | Pubmed                                                                                                                                                                                                                                                                                                                                                                                                                                                                                                                                                                                                                                                                                                                                                                                                                                                                                                              |
| <b>Website</b>        | https://pubmed.ncbi.nlm.nih.gov                                                                                                                                                                                                                                                                                                                                                                                                                                                                                                                                                                                                                                                                                                                                                                                                                                                                                     |
| <b>Time</b>           | database building - 2022.06.28                                                                                                                                                                                                                                                                                                                                                                                                                                                                                                                                                                                                                                                                                                                                                                                                                                                                                      |
| <b>Results</b>        | 27                                                                                                                                                                                                                                                                                                                                                                                                                                                                                                                                                                                                                                                                                                                                                                                                                                                                                                                  |
| <b>Search details</b> | Search: (((nlr[Title/Abstract]) OR (Neutrophil to lymphocyte ratio[Title/Abstract])) OR ("Neutrophil and lymphocyte ratio"[Title/Abstract])) AND (((Infant, Newborn[Title/Abstract]) OR (Newborn Infant[Title/Abstract])) OR (Newborn[Title/Abstract])) OR (Neonate[Title/Abstract])) OR ("Infant, Newborn"[Mesh])) AND (((((((Sepsis, Neonatal Late-Onset[Title/Abstract]) OR (Neonatal Sepses[Title/Abstract])) OR (Neonatal Sepsis[Title/Abstract])) OR (Early Onset Sepsis[Title/Abstract])) OR (Sepsis, Neonatal Early-Onset[Title/Abstract])) OR (LOS[Title/Abstract])) OR (EOS[Title/Abstract])) OR ("Neonatal Sepsis"[Mesh])) OR (((((((sepsis[Title/Abstract]) OR (Bloodstream Infection[Title/Abstract])) OR (Pyohemia[Title/Abstract])) OR (Pyaemia[Title/Abstract])) OR (Septicemia[Title/Abstract])) OR (Poisoning, Blood[Title/Abstract])) OR (Severe Sepsis[Title/Abstract])) OR ("Sepsis"[Mesh]))   |
| <b>Database</b>       | Embase                                                                                                                                                                                                                                                                                                                                                                                                                                                                                                                                                                                                                                                                                                                                                                                                                                                                                                              |
| <b>Website</b>        | https://www.embase.com                                                                                                                                                                                                                                                                                                                                                                                                                                                                                                                                                                                                                                                                                                                                                                                                                                                                                              |
| <b>Time</b>           | database building - 2022.06.28                                                                                                                                                                                                                                                                                                                                                                                                                                                                                                                                                                                                                                                                                                                                                                                                                                                                                      |
| <b>Results</b>        | 47                                                                                                                                                                                                                                                                                                                                                                                                                                                                                                                                                                                                                                                                                                                                                                                                                                                                                                                  |
| <b>Search details</b> | <p>No. Query</p> <p>#33: #10 AND #30 AND #32</p> <p>#32: #1 OR #2 OR #3 OR #31</p> <p>#31 : 'neutrophil lymphocyte ratio'/exp</p> <p>#30: 'neutrophil lymphocyte ratio'/exp</p> <p>#29 : #20 OR #21 OR #22 OR #23 OR #24 OR #25 OR #26 OR #27 OR #28</p> <p>#28 : 'eos':ab,ti</p> <p>#27 : 'los':ab,ti</p> <p>#26 : 'sepsis, neonatal early-onset':ab,ti</p> <p>#25 : 'early onset sepsis':ab,ti</p> <p>#24 : 'sepsis, neonatal late-onset':ab,ti</p> <p>#23 : 'neonatal sepsis':ab,ti</p> <p>#22 : 'neonatal sepsis':ab,ti</p> <p>#21 : 'newborn sepsis':ab,ti</p> <p>#20 : 'newborn sepsis'/exp</p> <p>#19 : #11 OR #12 OR #13 OR #14 OR #15 OR #16 OR #17 OR #18</p> <p>#18 : 'severe sepsis':ab,ti</p> <p>#17 : 'poisoning, blood':ab,ti</p> <p>#16 : 'septicemia':ab,ti</p> <p>#15 : 'pyohemia':ab,ti</p> <p>#14 : 'pyohemia':ab,ti</p> <p>#13 : 'bloodstream infection':ab,ti</p> <p>#12 : 'sepsis':ab,ti</p> |



|                       | <p>#11 : 'sepsis'/exp<br/> #10 : #5 OR #6 OR #7 OR #8<br/> #9 : 'neonate':ab,ti<br/> #8 : 'newborn':ab,ti<br/> #7 : 'newborn infant':ab,ti<br/> #6 : 'newborn':ab,ti<br/> #5 : 'newborn'/exp<br/> #4 : #1 OR #2 OR #3<br/> #3 : 'nlr':ab,ti<br/> #2 : 'neutrophil to lymphocyte ratio':ab,ti<br/> #1 : 'neutrophil and lymphocyte ratio':ab,ti</p>                                                                                                                                                                                                                                                                                                                                                                                                                                                                                                                                                                                                                                                                                                                                                                                                                                                                                                                                                                                                                                                                                                                                                                                                                                                           |       |        |      |    |                                                      |    |    |                                                                                                                                                                                                                     |      |    |                                                                       |       |    |                |       |    |                                             |      |    |                                                                                                                                                                  |       |    |                                                                                              |      |    |                |       |    |          |       |     |                                                      |       |     |                                                                                                                                          |       |     |            |       |
|-----------------------|--------------------------------------------------------------------------------------------------------------------------------------------------------------------------------------------------------------------------------------------------------------------------------------------------------------------------------------------------------------------------------------------------------------------------------------------------------------------------------------------------------------------------------------------------------------------------------------------------------------------------------------------------------------------------------------------------------------------------------------------------------------------------------------------------------------------------------------------------------------------------------------------------------------------------------------------------------------------------------------------------------------------------------------------------------------------------------------------------------------------------------------------------------------------------------------------------------------------------------------------------------------------------------------------------------------------------------------------------------------------------------------------------------------------------------------------------------------------------------------------------------------------------------------------------------------------------------------------------------------|-------|--------|------|----|------------------------------------------------------|----|----|---------------------------------------------------------------------------------------------------------------------------------------------------------------------------------------------------------------------|------|----|-----------------------------------------------------------------------|-------|----|----------------|-------|----|---------------------------------------------|------|----|------------------------------------------------------------------------------------------------------------------------------------------------------------------|-------|----|----------------------------------------------------------------------------------------------|------|----|----------------|-------|----|----------|-------|-----|------------------------------------------------------|-------|-----|------------------------------------------------------------------------------------------------------------------------------------------|-------|-----|------------|-------|
| <b>Database</b>       | Web of science                                                                                                                                                                                                                                                                                                                                                                                                                                                                                                                                                                                                                                                                                                                                                                                                                                                                                                                                                                                                                                                                                                                                                                                                                                                                                                                                                                                                                                                                                                                                                                                               |       |        |      |    |                                                      |    |    |                                                                                                                                                                                                                     |      |    |                                                                       |       |    |                |       |    |                                             |      |    |                                                                                                                                                                  |       |    |                                                                                              |      |    |                |       |    |          |       |     |                                                      |       |     |                                                                                                                                          |       |     |            |       |
| <b>Website</b>        | http://www.webofscience.com                                                                                                                                                                                                                                                                                                                                                                                                                                                                                                                                                                                                                                                                                                                                                                                                                                                                                                                                                                                                                                                                                                                                                                                                                                                                                                                                                                                                                                                                                                                                                                                  |       |        |      |    |                                                      |    |    |                                                                                                                                                                                                                     |      |    |                                                                       |       |    |                |       |    |                                             |      |    |                                                                                                                                                                  |       |    |                                                                                              |      |    |                |       |    |          |       |     |                                                      |       |     |                                                                                                                                          |       |     |            |       |
| <b>Time</b>           | database building - 2022.06.28                                                                                                                                                                                                                                                                                                                                                                                                                                                                                                                                                                                                                                                                                                                                                                                                                                                                                                                                                                                                                                                                                                                                                                                                                                                                                                                                                                                                                                                                                                                                                                               |       |        |      |    |                                                      |    |    |                                                                                                                                                                                                                     |      |    |                                                                       |       |    |                |       |    |                                             |      |    |                                                                                                                                                                  |       |    |                                                                                              |      |    |                |       |    |          |       |     |                                                      |       |     |                                                                                                                                          |       |     |            |       |
| <b>Results</b>        | 36                                                                                                                                                                                                                                                                                                                                                                                                                                                                                                                                                                                                                                                                                                                                                                                                                                                                                                                                                                                                                                                                                                                                                                                                                                                                                                                                                                                                                                                                                                                                                                                                           |       |        |      |    |                                                      |    |    |                                                                                                                                                                                                                     |      |    |                                                                       |       |    |                |       |    |                                             |      |    |                                                                                                                                                                  |       |    |                                                                                              |      |    |                |       |    |          |       |     |                                                      |       |     |                                                                                                                                          |       |     |            |       |
| <b>Search details</b> | <p>#1 (((((((((((TS=(Neonatal Sepsis)) OR TS=(Neonatal sepsis)) OR TS=(Sepsis, Neonatal Late-Onset)) OR TS=(Early Onset Sepsis)) OR TS=(Sepsis, Neonatal Early-Onset)) OR TS=(los)) OR TS=(eos)) OR TS=(sepsis)) OR TS=(Bloodstream Infection)) OR TS=(pyohemic)) OR TS=(pyaemic)) OR TS=(Septicemia)) OR TS=(Poisoning, Blood)) OR TS=(Severe Sepsis)<br/> #2 TS=(Neutrophil and lymphocyte ratio) or TS=(Neutrophil to lymphocyte ratio) or TS=(nlr)<br/> #3 (((TS=(Infant, Newborn)) OR TS=(Newborn Infant)) OR TS=(Newborn)) OR TS=(Neonate)<br/> #1 and #2 and #3</p>                                                                                                                                                                                                                                                                                                                                                                                                                                                                                                                                                                                                                                                                                                                                                                                                                                                                                                                                                                                                                                   |       |        |      |    |                                                      |    |    |                                                                                                                                                                                                                     |      |    |                                                                       |       |    |                |       |    |                                             |      |    |                                                                                                                                                                  |       |    |                                                                                              |      |    |                |       |    |          |       |     |                                                      |       |     |                                                                                                                                          |       |     |            |       |
| <b>Database</b>       | Cochrane                                                                                                                                                                                                                                                                                                                                                                                                                                                                                                                                                                                                                                                                                                                                                                                                                                                                                                                                                                                                                                                                                                                                                                                                                                                                                                                                                                                                                                                                                                                                                                                                     |       |        |      |    |                                                      |    |    |                                                                                                                                                                                                                     |      |    |                                                                       |       |    |                |       |    |                                             |      |    |                                                                                                                                                                  |       |    |                                                                                              |      |    |                |       |    |          |       |     |                                                      |       |     |                                                                                                                                          |       |     |            |       |
| <b>Website</b>        | https://www.cochrane.org                                                                                                                                                                                                                                                                                                                                                                                                                                                                                                                                                                                                                                                                                                                                                                                                                                                                                                                                                                                                                                                                                                                                                                                                                                                                                                                                                                                                                                                                                                                                                                                     |       |        |      |    |                                                      |    |    |                                                                                                                                                                                                                     |      |    |                                                                       |       |    |                |       |    |                                             |      |    |                                                                                                                                                                  |       |    |                                                                                              |      |    |                |       |    |          |       |     |                                                      |       |     |                                                                                                                                          |       |     |            |       |
| <b>Time</b>           | database building - 2022.06.28                                                                                                                                                                                                                                                                                                                                                                                                                                                                                                                                                                                                                                                                                                                                                                                                                                                                                                                                                                                                                                                                                                                                                                                                                                                                                                                                                                                                                                                                                                                                                                               |       |        |      |    |                                                      |    |    |                                                                                                                                                                                                                     |      |    |                                                                       |       |    |                |       |    |                                             |      |    |                                                                                                                                                                  |       |    |                                                                                              |      |    |                |       |    |          |       |     |                                                      |       |     |                                                                                                                                          |       |     |            |       |
| <b>Results</b>        | 30                                                                                                                                                                                                                                                                                                                                                                                                                                                                                                                                                                                                                                                                                                                                                                                                                                                                                                                                                                                                                                                                                                                                                                                                                                                                                                                                                                                                                                                                                                                                                                                                           |       |        |      |    |                                                      |    |    |                                                                                                                                                                                                                     |      |    |                                                                       |       |    |                |       |    |                                             |      |    |                                                                                                                                                                  |       |    |                                                                                              |      |    |                |       |    |          |       |     |                                                      |       |     |                                                                                                                                          |       |     |            |       |
| <b>Search details</b> | <table border="1"> <thead> <tr> <th>ID</th> <th>Search</th> <th>Hits</th> </tr> </thead> <tbody> <tr> <td>#1</td> <td>MeSH descriptor: [Neonatal Sepsis] explode all trees</td> <td>86</td> </tr> <tr> <td>#2</td> <td>(Neonatal Sepsis):ti,ab,kw OR (Sepsis, Neonatal Late-Onset):ti,ab,kw OR (Neonatal Sepses):ti,ab,kw OR (Early Onset Sepsis):ti,ab,kw OR (Sepsis, Neonatal Early-Onset):ti,ab,kw (Word variations have been searched)</td> <td>2151</td> </tr> <tr> <td>#3</td> <td>(LOS):ti,ab,kw OR (EOS):ti,ab,kw (Word variations have been searched)</td> <td>15529</td> </tr> <tr> <td>#4</td> <td>#1 or #2 or #3</td> <td>17494</td> </tr> <tr> <td>#5</td> <td>MeSH descriptor: [Sepsis] explode all trees</td> <td>4918</td> </tr> <tr> <td>#6</td> <td>(sepsis):ti,ab,kw OR (Bloodstream Infection):ti,ab,kw OR (Pyohemia):ti,ab,kw OR (Pyaemia):ti,ab,kw OR (Septicemia):ti,ab,kw (Word variations have been searched)</td> <td>13925</td> </tr> <tr> <td>#7</td> <td>(Poisoning, Blood):ti,ab,kw OR (Severe Sepsis):ti,ab,kw (Word variations have been searched)</td> <td>4942</td> </tr> <tr> <td>#8</td> <td>#5 or #6 or #7</td> <td>16646</td> </tr> <tr> <td>#9</td> <td>#4 or #8</td> <td>31666</td> </tr> <tr> <td>#10</td> <td>MeSH descriptor: [Infant, Newborn] explode all trees</td> <td>17498</td> </tr> <tr> <td>#11</td> <td>(Infant, Newborn):ti,ab,kw OR (Newborn Infant):ti,ab,kw OR (Newborn):ti,ab,kw OR (Neonate):ti,ab,kw (Word variations have been searched)</td> <td>40837</td> </tr> <tr> <td>#12</td> <td>#10 or #11</td> <td>40928</td> </tr> </tbody> </table> | ID    | Search | Hits | #1 | MeSH descriptor: [Neonatal Sepsis] explode all trees | 86 | #2 | (Neonatal Sepsis):ti,ab,kw OR (Sepsis, Neonatal Late-Onset):ti,ab,kw OR (Neonatal Sepses):ti,ab,kw OR (Early Onset Sepsis):ti,ab,kw OR (Sepsis, Neonatal Early-Onset):ti,ab,kw (Word variations have been searched) | 2151 | #3 | (LOS):ti,ab,kw OR (EOS):ti,ab,kw (Word variations have been searched) | 15529 | #4 | #1 or #2 or #3 | 17494 | #5 | MeSH descriptor: [Sepsis] explode all trees | 4918 | #6 | (sepsis):ti,ab,kw OR (Bloodstream Infection):ti,ab,kw OR (Pyohemia):ti,ab,kw OR (Pyaemia):ti,ab,kw OR (Septicemia):ti,ab,kw (Word variations have been searched) | 13925 | #7 | (Poisoning, Blood):ti,ab,kw OR (Severe Sepsis):ti,ab,kw (Word variations have been searched) | 4942 | #8 | #5 or #6 or #7 | 16646 | #9 | #4 or #8 | 31666 | #10 | MeSH descriptor: [Infant, Newborn] explode all trees | 17498 | #11 | (Infant, Newborn):ti,ab,kw OR (Newborn Infant):ti,ab,kw OR (Newborn):ti,ab,kw OR (Neonate):ti,ab,kw (Word variations have been searched) | 40837 | #12 | #10 or #11 | 40928 |
| ID                    | Search                                                                                                                                                                                                                                                                                                                                                                                                                                                                                                                                                                                                                                                                                                                                                                                                                                                                                                                                                                                                                                                                                                                                                                                                                                                                                                                                                                                                                                                                                                                                                                                                       | Hits  |        |      |    |                                                      |    |    |                                                                                                                                                                                                                     |      |    |                                                                       |       |    |                |       |    |                                             |      |    |                                                                                                                                                                  |       |    |                                                                                              |      |    |                |       |    |          |       |     |                                                      |       |     |                                                                                                                                          |       |     |            |       |
| #1                    | MeSH descriptor: [Neonatal Sepsis] explode all trees                                                                                                                                                                                                                                                                                                                                                                                                                                                                                                                                                                                                                                                                                                                                                                                                                                                                                                                                                                                                                                                                                                                                                                                                                                                                                                                                                                                                                                                                                                                                                         | 86    |        |      |    |                                                      |    |    |                                                                                                                                                                                                                     |      |    |                                                                       |       |    |                |       |    |                                             |      |    |                                                                                                                                                                  |       |    |                                                                                              |      |    |                |       |    |          |       |     |                                                      |       |     |                                                                                                                                          |       |     |            |       |
| #2                    | (Neonatal Sepsis):ti,ab,kw OR (Sepsis, Neonatal Late-Onset):ti,ab,kw OR (Neonatal Sepses):ti,ab,kw OR (Early Onset Sepsis):ti,ab,kw OR (Sepsis, Neonatal Early-Onset):ti,ab,kw (Word variations have been searched)                                                                                                                                                                                                                                                                                                                                                                                                                                                                                                                                                                                                                                                                                                                                                                                                                                                                                                                                                                                                                                                                                                                                                                                                                                                                                                                                                                                          | 2151  |        |      |    |                                                      |    |    |                                                                                                                                                                                                                     |      |    |                                                                       |       |    |                |       |    |                                             |      |    |                                                                                                                                                                  |       |    |                                                                                              |      |    |                |       |    |          |       |     |                                                      |       |     |                                                                                                                                          |       |     |            |       |
| #3                    | (LOS):ti,ab,kw OR (EOS):ti,ab,kw (Word variations have been searched)                                                                                                                                                                                                                                                                                                                                                                                                                                                                                                                                                                                                                                                                                                                                                                                                                                                                                                                                                                                                                                                                                                                                                                                                                                                                                                                                                                                                                                                                                                                                        | 15529 |        |      |    |                                                      |    |    |                                                                                                                                                                                                                     |      |    |                                                                       |       |    |                |       |    |                                             |      |    |                                                                                                                                                                  |       |    |                                                                                              |      |    |                |       |    |          |       |     |                                                      |       |     |                                                                                                                                          |       |     |            |       |
| #4                    | #1 or #2 or #3                                                                                                                                                                                                                                                                                                                                                                                                                                                                                                                                                                                                                                                                                                                                                                                                                                                                                                                                                                                                                                                                                                                                                                                                                                                                                                                                                                                                                                                                                                                                                                                               | 17494 |        |      |    |                                                      |    |    |                                                                                                                                                                                                                     |      |    |                                                                       |       |    |                |       |    |                                             |      |    |                                                                                                                                                                  |       |    |                                                                                              |      |    |                |       |    |          |       |     |                                                      |       |     |                                                                                                                                          |       |     |            |       |
| #5                    | MeSH descriptor: [Sepsis] explode all trees                                                                                                                                                                                                                                                                                                                                                                                                                                                                                                                                                                                                                                                                                                                                                                                                                                                                                                                                                                                                                                                                                                                                                                                                                                                                                                                                                                                                                                                                                                                                                                  | 4918  |        |      |    |                                                      |    |    |                                                                                                                                                                                                                     |      |    |                                                                       |       |    |                |       |    |                                             |      |    |                                                                                                                                                                  |       |    |                                                                                              |      |    |                |       |    |          |       |     |                                                      |       |     |                                                                                                                                          |       |     |            |       |
| #6                    | (sepsis):ti,ab,kw OR (Bloodstream Infection):ti,ab,kw OR (Pyohemia):ti,ab,kw OR (Pyaemia):ti,ab,kw OR (Septicemia):ti,ab,kw (Word variations have been searched)                                                                                                                                                                                                                                                                                                                                                                                                                                                                                                                                                                                                                                                                                                                                                                                                                                                                                                                                                                                                                                                                                                                                                                                                                                                                                                                                                                                                                                             | 13925 |        |      |    |                                                      |    |    |                                                                                                                                                                                                                     |      |    |                                                                       |       |    |                |       |    |                                             |      |    |                                                                                                                                                                  |       |    |                                                                                              |      |    |                |       |    |          |       |     |                                                      |       |     |                                                                                                                                          |       |     |            |       |
| #7                    | (Poisoning, Blood):ti,ab,kw OR (Severe Sepsis):ti,ab,kw (Word variations have been searched)                                                                                                                                                                                                                                                                                                                                                                                                                                                                                                                                                                                                                                                                                                                                                                                                                                                                                                                                                                                                                                                                                                                                                                                                                                                                                                                                                                                                                                                                                                                 | 4942  |        |      |    |                                                      |    |    |                                                                                                                                                                                                                     |      |    |                                                                       |       |    |                |       |    |                                             |      |    |                                                                                                                                                                  |       |    |                                                                                              |      |    |                |       |    |          |       |     |                                                      |       |     |                                                                                                                                          |       |     |            |       |
| #8                    | #5 or #6 or #7                                                                                                                                                                                                                                                                                                                                                                                                                                                                                                                                                                                                                                                                                                                                                                                                                                                                                                                                                                                                                                                                                                                                                                                                                                                                                                                                                                                                                                                                                                                                                                                               | 16646 |        |      |    |                                                      |    |    |                                                                                                                                                                                                                     |      |    |                                                                       |       |    |                |       |    |                                             |      |    |                                                                                                                                                                  |       |    |                                                                                              |      |    |                |       |    |          |       |     |                                                      |       |     |                                                                                                                                          |       |     |            |       |
| #9                    | #4 or #8                                                                                                                                                                                                                                                                                                                                                                                                                                                                                                                                                                                                                                                                                                                                                                                                                                                                                                                                                                                                                                                                                                                                                                                                                                                                                                                                                                                                                                                                                                                                                                                                     | 31666 |        |      |    |                                                      |    |    |                                                                                                                                                                                                                     |      |    |                                                                       |       |    |                |       |    |                                             |      |    |                                                                                                                                                                  |       |    |                                                                                              |      |    |                |       |    |          |       |     |                                                      |       |     |                                                                                                                                          |       |     |            |       |
| #10                   | MeSH descriptor: [Infant, Newborn] explode all trees                                                                                                                                                                                                                                                                                                                                                                                                                                                                                                                                                                                                                                                                                                                                                                                                                                                                                                                                                                                                                                                                                                                                                                                                                                                                                                                                                                                                                                                                                                                                                         | 17498 |        |      |    |                                                      |    |    |                                                                                                                                                                                                                     |      |    |                                                                       |       |    |                |       |    |                                             |      |    |                                                                                                                                                                  |       |    |                                                                                              |      |    |                |       |    |          |       |     |                                                      |       |     |                                                                                                                                          |       |     |            |       |
| #11                   | (Infant, Newborn):ti,ab,kw OR (Newborn Infant):ti,ab,kw OR (Newborn):ti,ab,kw OR (Neonate):ti,ab,kw (Word variations have been searched)                                                                                                                                                                                                                                                                                                                                                                                                                                                                                                                                                                                                                                                                                                                                                                                                                                                                                                                                                                                                                                                                                                                                                                                                                                                                                                                                                                                                                                                                     | 40837 |        |      |    |                                                      |    |    |                                                                                                                                                                                                                     |      |    |                                                                       |       |    |                |       |    |                                             |      |    |                                                                                                                                                                  |       |    |                                                                                              |      |    |                |       |    |          |       |     |                                                      |       |     |                                                                                                                                          |       |     |            |       |
| #12                   | #10 or #11                                                                                                                                                                                                                                                                                                                                                                                                                                                                                                                                                                                                                                                                                                                                                                                                                                                                                                                                                                                                                                                                                                                                                                                                                                                                                                                                                                                                                                                                                                                                                                                                   | 40928 |        |      |    |                                                      |    |    |                                                                                                                                                                                                                     |      |    |                                                                       |       |    |                |       |    |                                             |      |    |                                                                                                                                                                  |       |    |                                                                                              |      |    |                |       |    |          |       |     |                                                      |       |     |                                                                                                                                          |       |     |            |       |

|                       |                                                                                                                                                                                                     |
|-----------------------|-----------------------------------------------------------------------------------------------------------------------------------------------------------------------------------------------------|
|                       | #13 (Neutrophil and lymphocyte ratio):ti,ab,kw OR (Neutrophil to lymphocyte ratio):ti,ab,kw OR (nlr):ti,ab,kw (Word variations have been searched) 915<br>#14 #9 or #12 68896<br>#15 #14 and #13 30 |
| <b>Database</b>       | CNKI ( <i>Chinese database</i> )                                                                                                                                                                    |
| <b>Website</b>        | <a href="https://www.cnki.net">https://www.cnki.net</a>                                                                                                                                             |
| <b>Time</b>           | database building - 2022.06.28                                                                                                                                                                      |
| <b>Results</b>        | 195                                                                                                                                                                                                 |
| <b>Search detail</b>  | (主题=脓毒症 + 败血症 + 新生儿败血症 + 血流感染 + 早发性败血症 + 迟发性败血症 + 血液中毒 + 新生儿脓毒症) AND (主题=中性粒淋巴细胞比 + nlr)                                                                                                            |
| <b>Database</b>       | Wanfang ( <i>Chinese database</i> )                                                                                                                                                                 |
| <b>Website</b>        | <a href="https://www.wanfangdata.com.cn/index.html">https://www.wanfangdata.com.cn/index.html</a>                                                                                                   |
| <b>Time</b>           | database building - 2022.06.28                                                                                                                                                                      |
| <b>Results</b>        | 319                                                                                                                                                                                                 |
| <b>Search details</b> | 检索表达式(中英文扩展&主题词扩展): 主题:(新生儿败血症 or 败血症 or 新生儿脓毒症 or 脓毒症 or 早发性败血症 or 迟发性败血症 or 血流感染 ) and 主题:(中性粒淋巴细胞比值 or nlr)                                                                                      |
| <b>Database</b>       | China Biomedical Literature Database ( <i>Chinese database</i> )                                                                                                                                    |
| <b>Website</b>        | <a href="http://www.sinomed.ac.cn/index.jsp">http://www.sinomed.ac.cn/index.jsp</a>                                                                                                                 |
| <b>Time</b>           | database building - 2022.06.28                                                                                                                                                                      |
| <b>Results</b>        | 137                                                                                                                                                                                                 |
| <b>Search details</b> | ((("中性粒淋巴细胞比值"[常用字段:智能] OR "nlr"[常用字段:智能])) AND (("脓毒症"[常用字段:智能] OR "败血症"[常用字段:智能] OR "新生儿脓毒症"[常用字段:智能] OR "新生儿败血症"[常用字段:智能] OR "早发性败血症"[常用字段:智能] OR "迟发性败血症"[常用字段:智能] OR "血流感染"[常用字段:智能]))         |
| <b>Database</b>       | VIP Database ( <i>Chinese database</i> )                                                                                                                                                            |
| <b>Website</b>        | <a href="http://qikan.cqvip.com">http://qikan.cqvip.com</a>                                                                                                                                         |
| <b>Time</b>           | database building - 2022.06.28                                                                                                                                                                      |
| <b>Results</b>        | 43                                                                                                                                                                                                  |
| <b>Search details</b> | 检索表达式(主题词扩展): 主题:(新生儿败血症 or 败血症 or 新生儿脓毒症 or 脓毒症 or 早发性败血症 or 迟发性败血症 or 血流感染 ) and 主题:(中性粒淋巴细胞比值 or nlr)                                                                                            |

Table 1 characteristics of the included 14 studies.

| Author                     | Year | Selected time | Study design          | Sepsis diagnosis | Region      | Early /Late | Case/C ontrol | T P | F P | F N | T N | SE   | SP   | Cut off | Neonates   |
|----------------------------|------|---------------|-----------------------|------------------|-------------|-------------|---------------|-----|-----|-----|-----|------|------|---------|------------|
| R H Ruslie [1]             | 2018 | 2016-2017     | Retrospective         | Blood culture    | USA         | EOS、<br>LOS | 52/42         | 32  | 14  | 20  | 28  | 61.5 | 66.7 | 9.4     | A、 B、<br>C |
| Senem Alkan Ozdemir [2]    | 2017 | 2014-2015     | Prospective           | Blood culture    | Turkey      | LOS         | 52/75         | 38  | 16  | 14  | 58  | 73   | 78   | 1.77    | A          |
| Ori Goldberg [3]           | 2020 | 2016-2019     | Retrospective         | Blood culture    | Israel      | LOS         | 31/62         | 26  | 13  | 5   | 49  | 83.9 | 79   | 1.5     | A、 B、<br>C |
| Rocky Wilar, MD [4]        | 2018 | 2017-2017     | Cross-sectional study | Blood culture    | Indonesia   | EOS         | 90/30         | 75  | 2   | 15  | 28  | 83.3 | 93.3 | 1.24    | A、 B、<br>C |
| Khadijah Rizky Sumitro [5] | 2021 | 2019-2019     | Cross-sectional study | Blood culture    | Indonesia   | EOS、<br>LOS | 52/52         | 42  | 30  | 10  | 22  | 80.8 | 42.3 | 2.12    | A、 B、<br>C |
| Xiaoyu Du [6]              | 2019 | 2015-2017     | Retrospective         | Blood culture    | China       | EOS、<br>LOS | 58/30         | 43  | 6   | 15  | 24  | 73.3 | 81   | 0.7     | NA         |
| Shujian Zhang [7]          | 2021 | 2018-2020     | Descriptive study     | Blood culture    | China       | EOS         | 74/50         | 57  | 11  | 17  | 39  | 77   | 78   | 3.16    | A、 B、<br>C |
| Santosh K. Panda [8]       | 2021 | 2018-2018     | Retrospective         | Blood culture    | Philippines | EOS、<br>LOS | 41/52         | 28  | 28  | 13  | 24  | 68.3 | 46.2 | 1.7     | A、 B、<br>C |
| Emrah Can, MD [9]          | 2017 | 2015-2017     | Prospective           | Blood culture    | Turkey      | EOS         | 78/44         | 76  | 0   | 2   | 44  | 97.4 | 100  | 6.76    | B          |
| Nagwa Mohamed, SAM [10]    | 2020 | 2018-2019     | Prospective           | Blood culture    | Egypt       | EOS         | 40/40         | 27  | 0   | 13  | 40  | 67   | 99   | 0.1     | B          |
| Sara Mohamed Mira [11]     | 2021 | 2018-2019     | Retrospective         | Blood culture    | Egypt       | EOS         | 60/60         | 43  | 0   | 17  | 60  | 72   | 100  | 1       | A、 B       |
| Ipek Guney Varal [12]      | 2020 | 2016-2018     | Retrospective         | Blood culture    | Turkey      | LOS         | 76/40         | 52  | 7   | 24  | 33  | 68   | 82   | 1.57    | A          |
| Heriyanto Lim [13]         | 2021 | 2018-2018     | Retrospective         | Blood culture    | Indonesia   | EOS、<br>LOS | 22/62         | 18  | 21  | 4   | 41  | 81.8 | 66.1 | 2.31    | A、 B       |

|   |                    |      |           |               |               |        |      |       |   |   |    |    |     |      |      |    |
|---|--------------------|------|-----------|---------------|---------------|--------|------|-------|---|---|----|----|-----|------|------|----|
| 5 |                    |      |           |               |               |        | EOS、 | 57/77 | 5 | 1 | 52 | 76 | 8.8 | 98.7 | 4.79 |    |
| 6 | Abdullah Kurt [14] | 2022 | 2016-2018 | Retrospective | Blood culture | Turkey | LOS  |       |   |   |    |    |     |      |      | NA |
| 8 |                    |      |           |               |               |        | EOS  | 20/77 | 3 | 1 | 17 | 76 | 15  | 98.7 | 4.79 |    |
| 9 |                    |      |           |               |               |        | LOS  | 37/77 | 2 | 1 | 35 | 76 | 5.4 | 98.7 | 4.94 |    |

**Note:** EOS: Early-onset sepsis, LOS: Late-onset sepsis, A: Preterm, B: Term, C: Late term, NA:Not Available, TP: true positive, FP: false positive, TN: true negative, FN: false negative, SEN: sensitivity, SPE: specificity.

## Reference

- [1] Ruslie R H, Tjipta D G, Samosir C T, et al. Bacterial pattern, and role of laboratory parameters as marker for neonatal sepsis[C]/IOP Conference Series: Earth and Environmental Science. *IOP Publishing*, 2018, 125(1): 012057.
- [2] Alkan Ozdemir S ,S, Arun Ozer E , Ilhan O , et al. Can neutrophil to lymphocyte ratio predict late-onset sepsis in preterm infants?[infants? [J]. *Journal of Clinical Laboratory Analysis*, 2017:e22338.
- [3] Goldberg O, Amitai N, Chodick G, et al. Can we improve early identification of neonatal late-onset sepsis? A validated prediction model[J]. *Journal of Perinatology*, 2020, 40(9): p. 1315-1322.

- 1  
2  
3  
4  
5 [4] Wilar R. Diagnostic value of eosinopenia and neutrophil to lymphocyte ratio on early onset neonatal sepsis[J]. *Korean Journal of Pediatrics*, 2018, 62(6): p. 217-  
6 223.  
7  
8  
9  
10 [5] Sumitro K R , Utomo M T , Widodo A . Neutrophil-to-Lymphocyte Ratio as an Alternative Marker of Neonatal Sepsis in Developing Countries[J]. *Oman Medical*  
11 *Journal*, 2021, 36(1):e214-e214.  
12  
13  
14  
15 [6] Du xiaoyu,Ai liang. Changes and clinical significance of NLR, CRP and PCT in neonates with sepsis. *Experimental and Laboratory Medicine*,2019.37(01): p.110-  
16 112.  
17  
18  
19  
20 [7] Zhang, S.J.Platelet-to-Lymphocyte and Neutrophil-to-Lymphocyte Ratio as Predictive Biomarkers for Early-onset Neonatal Sepsis. *Jcsp-Journal of the College*  
21 *of Physicians and Surgeons Pakistan*, 2021. 31(7): p. 821-824.  
22  
23  
24  
25 [8] Panda S K, Nayak M K, Rath S, et al. The Utility of the Neutrophil-Lymphocyte Ratio as an Early Diagnostic Marker in Neonatal Sepsis[J]. *Cureus*, 2021, 13(1):  
26 e12891.  
27  
28  
29  
30 [9] E.C, H.S,C.C,et al.The Value of Neutrophil to Lymphocyte Ratio and Platelet to Lymphocyte Ratio for Detecting Early-onset Neonatal Sepsis. *Journal of pediatric*  
31 *hematology/oncology*, 2018. 40(4) E229-E232.  
32  
33  
34  
35  
36  
37  
38  
39  
40  
41  
42  
43  
44  
45  
46

- 1  
2  
3  
4  
5 [10] Mahmoud N M S A, Baheeg G, Abdelhakeem M, et al. Platelet to Lymphocyte Ratio and Neutrophil to Lymphocyte Ratio as New Diagnostic Markers for Detection  
6 of Early-onset Neonatal Sepsis in Full-term Newborns. 2019.  
7  
8  
9  
10 [11] Mira S M, Alkhalegy H A, Abd-Elraheem S I, et al. Neutrophil and Platelet to Lymphocyte Ratio for Detecting Early-onset Neonatal Sepsis[J]. *International*  
11 *Journal of Medical Arts*, 2021, 3(2): 1274-1281.  
12  
13  
14  
15 [12] Varal I, Dogan P. Can neutrophil-lymphocyte ratio be a predictor of late-onset sepsis in preterm infants? [J]. *Annals of Medical Research*, 2020, 27(1):23.  
16  
17  
18 [13] Lim, H. Sukmawati. M, Artana. W. D, et al. Validity of neutrophil lymphocyte count ratio in neonatal sepsis. *International Journal of Health*  
19 *Sciences*, (2021).5(2), 53-61.  
20  
21  
22 [14] Kurt A, Tosun MS, Altuntaş N: Diagnostic accuracy of complete blood cell count and neutrophil-to-lymphocyte, lymphocyte-to-monocyte,  
23 and platelet-to-lymphocyte ratios for neonatal infection. *Asian Biomedicine* 2022, 16(1):43-52.  
24  
25  
26  
27  
28  
29  
30  
31  
32  
33  
34  
35  
36  
37  
38  
39  
40  
41  
42  
43  
44  
45  
46

**Table 2 The result of meta-regression****Sensitivity and Specificity**

| Parameter   | Category            | Studies | Sen  | P1   | Spe  | P2   |
|-------------|---------------------|---------|------|------|------|------|
| Asia        | Yes                 | 11      | 0.75 | 0.92 | 0.84 | 0.28 |
|             | No                  | 3       | 0.67 |      | 0.98 |      |
| Year (2019) | Yes ( $\geq 2019$ ) | 10      | 0.69 | 0.08 | 0.87 | 0.87 |
|             | No ( $< 2019$ )     | 4       | 0.83 |      | 0.91 |      |
| Preterm     | Yes                 | 2       | 0.71 | 0.73 | 0.81 | 0.91 |
|             | No                  | 12      | 0.74 |      | 0.89 |      |
| Prospective | Yes                 | 3       | 0.84 | 0.62 | 0.98 | 0.01 |
|             | No                  | 11      | 0.70 |      | 0.83 |      |

**Joint Model**

| Parameter   | Category            | LRTChi <sup>2</sup> | Pvalue | I <sup>2</sup> | I <sup>2</sup> lo | I <sup>2</sup> hi |
|-------------|---------------------|---------------------|--------|----------------|-------------------|-------------------|
| Asia        | Yes                 | 2.74                | 0.25   | 27             | 0                 | 100               |
|             | No                  |                     |        |                |                   |                   |
| Year (2019) | Yes ( $\geq 2019$ ) | 1.82                | 0.40   | 0              | 0                 | 100               |
|             | No ( $< 2019$ )     |                     |        |                |                   |                   |
| Preterm     | Yes                 | 0.31                | 0.86   | 0              | 0                 | 100               |
|             | No                  |                     |        |                |                   |                   |
| Prospective | Yes                 | 5.28                | 0.07   | 62             | 15                | 100               |
|             | No                  |                     |        |                |                   |                   |

**Table 3 The results of sensitivity analysis**

| Studies                  | Studies          | Sen(95%CI)      | Spe(95%CI)      | LR <sup>-</sup> (95%CI) | LR <sup>+</sup> (95%CI) | DOR (95%CI) | AUC (95%CI)     | Q      |
|--------------------------|------------------|-----------------|-----------------|-------------------------|-------------------------|-------------|-----------------|--------|
| Overall                  | 14[1-14]         | 0.74[0.61-0.83] | 0.88[0.73-0.95] | 0.30[0.19-0.46]         | 6.3[2.6-15.5]           | 21[7-65]    | 0.87[0.84-0.89] | 140.85 |
| Remove non-Asian         | 11[2-9,12-14]    | 0.75[0.59-0.87] | 0.83[0.68-0.92] | 0.30[0.17-0.52]         | 4.4[2.2-8.9]            | 15[5-42]    | 0.86[0.83-0.89] | 120.59 |
| Remove preterm           | 12[1,3-11,13-14] | 0.74[0.59-0.85] | 0.90[0.72-0.97] | 0.29[0.17-0.48]         | 7.6[2.4-24.0]           | 27[7-107]   | 0.88[0.85-0.90] | 147.40 |
| Remove LOS               | 11[1,4-11,13,14] | 0.73[0.56-0.85] | 0.92[0.72-0.98] | 0.29[0.17-0.51]         | 8.6[2.3-32.8]           | 29[6-145]   | 0.88[0.85-0.90] | 147.96 |
| Remove Prospective study | 11[1,3-8,11-14]  | 0.70[0.56-0.81] | 0.83[0.66-0.92] | 0.36[0.25-0.53]         | 4.1[2.1-8.1]            | 11[5-25]    | 0.82[0.79-0.85] | 133.33 |

**Note:** Sen: sensitivity; Spe: specificity; LR<sup>-</sup>: negative likelihood ratio; LR<sup>+</sup>: positive likelihood ratio; DOR: diagnostic odds ratio; AUC: area under the curve;

## Reference

- [1] Ruslie R H, Tjipta D G, Samosir C T, et al. Bacterial pattern, and role of laboratory parameters as marker for neonatal sepsis[C]//IOP Conference Series: Earth and Environmental Science. *IOP Publishing*, 2018, 125(1): 012057.
- [2] Alkan Ozdemir S ,S, Arun Ozer E , Ilhan O , et al. Can neutrophil to lymphocyte ratio predict late-onset sepsis in preterm infants?[infants? [J]. *Journal of Clinical Laboratory Analysis*, 2017:e22338.
- [3] Goldberg O, Amitai N, Chodick G, et al. Can we improve early identification of neonatal late-onset sepsis? A validated prediction model[J]. *Journal of Perinatology*, 2020, 40(9): p. 1315-1322.



1  
2  
3  
4  
5 [4] Wilar R. Diagnostic value of eosinopenia and neutrophil to lymphocyte ratio on early onset neonatal sepsis[J]. *Korean Journal of Pediatrics*, 2018, 62(6): p.  
6 217-223.  
7

8  
9  
10 [5] Sumitro K R , Utomo M T , Widodo A . Neutrophil-to-Lymphocyte Ratio as an Alternative Marker of Neonatal Sepsis in Developing Countries[J]. *Oman Medical*  
11 *Journal*, 2021, 36(1):e214-e214.  
12

13  
14  
15 [6] Du xiaoyu,Ai liang. Changes and clinical significance of NLR, CRP and PCT in neonates with sepsis. *Experimental and Laboratory Medicine*,2019.37(01):  
16 p.110-112.  
17

18  
19  
20 [7] Zhang, S.J.Platelet-to-Lymphocyte and Neutrophil-to-Lymphocyte Ratio as Predictive Biomarkers for Early-onset Neonatal Sepsis. *Jcpsp-Journal of the College*  
21 *of Physicians and Surgeons Pakistan*, 2021. 31(7): p. 821-824.  
22

23  
24  
25 [8] Panda S K, Nayak M K, Rath S, et al. The Utility of the Neutrophil-Lymphocyte Ratio as an Early Diagnostic Marker in Neonatal Sepsis[J]. *Cureus*, 2021, 13(1):  
26 e12891.  
27

28  
29  
30 [9] E.C, H.S,C.C,et al.The Value of Neutrophil to Lymphocyte Ratio and Platelet to Lymphocyte Ratio for Detecting Early-onset Neonatal Sepsis. *Journal of*  
31 *pediatric hematology/oncology*, 2018. 40(4) E229-E232.  
32  
33  
34  
35  
36  
37  
38  
39  
40  
41  
42  
43  
44  
45  
46

- 1  
2  
3  
4  
5 [10] Mahmoud N M S A, Baheeg G, Abdelhakeem M, et al. Platelet to Lymphocyte Ratio and Neutrophil to Lymphocyte Ratio as New Diagnostic Markers for  
6  
7  
8  
9  
10  
11  
12  
13  
14  
15  
16 [11] Mira S M, Alkhalegy H A, Abd-Elraheem S I, et al. Neutrophil and Platelet to Lymphocyte Ratio for Detecting Early-onset Neonatal Sepsis[J]. *International*  
17  
18  
19  
20  
21  
22  
23  
24  
25  
26  
27  
28  
29  
30  
31  
32  
33  
34  
35  
36  
37  
38  
39  
40  
41  
42  
43  
44  
45  
46
- [12] Varal I, Dogan P. Can neutrophil-lymphocyte ratio be a predictor of late-onset sepsis in preterm infants? [J]. *Annals of Medical Research*, 2020, 27(1):23.
- [13] Lim, H. Sukmawati. M, Artana. W. D, et al. Validity of neutrophil lymphocyte count ratio in neonatal sepsis. *International Journal of Health Sciences*, (2021).5(2), 53-61.
- [14] Kurt A, Tosun MS, Altuntaş N: Diagnostic accuracy of complete blood cell count and neutrophil-to-lymphocyte, lymphocyte-to-monocyte, and platelet-to-lymphocyte ratios for neonatal infection. *Asian Biomedicine* 2022, 16(1):43-52.

**Table 4 Subgroup analysis of neutrophil-to-lymphocyte ratio in the diagnosis of neonatal sepsis.**

| Subgroup        | Study number      | Sen  | Spe  | LR <sup>+</sup> | LR <sup>-</sup> | DOR   | AUC  |
|-----------------|-------------------|------|------|-----------------|-----------------|-------|------|
| All             | 14 [1-14]         | 0.74 | 0.88 | 6.35            | 0.30            | 21.27 | 0.87 |
| <b>Neonates</b> |                   |      |      |                 |                 |       |      |
| EOS             | 6 [4,7,9-11,14]   | 0.75 | 0.99 | 63.30           | 0.26            | 247   | 0.97 |
| LOS             | 4 [2,3,12,14]     | 0.60 | 0.85 | 3.71            | 0.41            | 11.14 | 0.85 |
| <b>Areas</b>    |                   |      |      |                 |                 |       |      |
| Asian           | 11 [2-9,12-14]    | 0.75 | 0.83 | 4.40            | 0.30            | 15    | 0.86 |
| Non-Asian       | 3 [1,10,11]       | 0.67 | 0.90 | 18.64           | 0.38            | 45.94 | 0.95 |
| <b>Cut off</b>  |                   |      |      |                 |                 |       |      |
| 0-2             | 8 [2-4,6,8,10-12] | 0.74 | 0.90 | 7.1             | 0.29            | 25    | 0.77 |
| 2-4             | 3 [5,7,13]        | 0.79 | 0.62 | 2.21            | 0.33            | 6.73  | 0.85 |
| >4              | 3 [1,9,14]        | 0.60 | 0.91 | 9.00            | 0.27            | 31.51 | 0.95 |

**Note:** SEN: sensitivity; SPE: specificity; LR<sup>-</sup>: negative likelihood ratio; LR<sup>+</sup>: positive likelihood ratio; DOR: diagnostic odds ratio; AUC: area under the curve;

#### Reference

- [1] Ruslie R H, Tjipta D G, Samosir C T, et al. Bacterial pattern, and role of laboratory parameters as marker for neonatal sepsis[C]/IOP Conference Series: Earth and Environmental Science. *IOP Publishing*, 2018, 125(1): 012057.
- [2] Alkan Ozdemir S ,S, Arun Ozer E , Ilhan O , et al. Can neutrophil to lymphocyte ratio predict late-onset sepsis in preterm infants?[infants? [J]. *Journal of Clinical Laboratory Analysis*, 2017:e22338.
- [3] Goldberg O, Amitai N, Chodick G, et al. Can we improve early identification of neonatal late-onset sepsis? A validated prediction model[J]. *Journal of Perinatology*, 2020, 40(9): p. 1315-1322.
- [4] Wilar R. Diagnostic value of eosinopenia and neutrophil to lymphocyte ratio on early onset neonatal sepsis[J]. *Korean Journal of Pediatrics*, 2018, 62(6): p. 217-223.

- 1  
2  
3  
4 [5] Sumitro K R , Utomo M T , Widodo A . Neutrophil-to-Lymphocyte Ratio as an Alternative  
5  
6 Marker of Neonatal Sepsis in Developing Countries[J]. *Oman Medical Journal*, 2021,  
7  
8 36(1):e214-e214.  
9  
10  
11 [6] Du xiaoyu,Ai liang. Changes and clinical significance of NLR, CRP and PCT in neonates with  
12  
13 sepsis. *Experimental and Laboratory Medicine*,2019.37(01): p.110-112.  
14  
15  
16 [7] Zhang, S.J.Platelet-to-Lymphocyte and Neutrophil-to-Lymphocyte Ratio as Predictive  
17  
18 Biomarkers for Early-onset Neonatal Sepsis. *Jcsp-Journal of the College of Physicians and*  
19  
20 *Surgeons Pakistan*, 2021. 31(7): p. 821-824.  
21  
22  
23 [8] Panda S K, Nayak M K, Rath S, et al. The Utility of the Neutrophil-Lymphocyte Ratio as an  
24  
25 Early Diagnostic Marker in Neonatal Sepsis[J]. *Cureus*, 2021, 13(1): e12891.  
26  
27  
28 [9] E.C, H.S,C.C,et al.The Value of Neutrophil to Lymphocyte Ratio and Platelet to Lymphocyte  
29  
30 Ratio for Detecting Early-onset Neonatal Sepsis. *Journal of pediatric hematology/oncology*, 2018.  
31  
32  
33 40(4) E229-E232.  
34  
35  
36 [10] Mahmoud N M S A, Baheeg G, Abdelhakeem M, et al.Platelet to Lymphocyte Ratio and  
37  
38 Neutrophil to Lymphocyte Ratio as New Diagnostic Markers for Detection of Early-onset  
39  
40 Neonatal Sepsis in Full-term Newborns. 2019.  
41  
42  
43 [11] Mira S M, Alkhalegy H A, Abd-Elraheem S I, et al. Neutrophil and Platelet to Lymphocyte  
44  
45 Ratio for Detecting Early-onset Neonatal Sepsis[J]. *International Journal of Medical Arts*, 2021,  
46  
47 3(2): 1274-1281.  
48  
49  
50 [12] Varal I,Dogan P. Can neutrophil-lymphocyte ratio be a predictor of late-onset sepsis in  
51  
52 preterm infants? [J]. *Annals of Medical Research*, 2020, 27(1):23.  
53  
54  
55  
56  
57  
58  
59  
60

1  
2  
3  
4 [13] Lim, H.Sukmawati.M, Artana.W. D,et al.Validity of neutrophil lymphocyte  
5  
6 count ratio in neonatal sepsis. *International Journal of Health Sciences*, (2021).5(2),  
7  
8 53-61.  
9

10  
11  
12 [14] Kurt A, Tosun MS, Altuntaş N: Diagnostic accuracy of complete blood cell  
13  
14 count and neutrophil-to-lymphocyte, lymphocyte-to-monocyte, and  
15  
16 platelet-to-lymphocyte ratios for neonatal infection. *Asian Biomedicine* 2022,  
17  
18 16(1):43-52.  
19  
20  
21  
22  
23  
24  
25  
26  
27  
28  
29  
30  
31  
32  
33  
34  
35  
36  
37  
38  
39  
40  
41  
42  
43  
44  
45  
46  
47  
48  
49  
50  
51  
52  
53  
54  
55  
56  
57  
58  
59  
60



# PRISMA-DTA for Abstracts Checklist

1  
2  
3  
4  
5  
6  
7  
8  
9  
10  
11  
12  
13  
14  
15  
16  
17  
18  
19  
20  
21  
22  
23  
24  
25  
26  
27  
28  
29  
30  
31  
32  
33  
34  
35  
36  
37  
38  
39  
40  
41  
42  
43  
44  
45  
46  
47

| Section/topic                | #  | PRISMA-DTA for Abstracts Checklist item                                                                                                                                                                                                                                                                                                                                                                                                                                                                                                                                                                           | Reported on page # |
|------------------------------|----|-------------------------------------------------------------------------------------------------------------------------------------------------------------------------------------------------------------------------------------------------------------------------------------------------------------------------------------------------------------------------------------------------------------------------------------------------------------------------------------------------------------------------------------------------------------------------------------------------------------------|--------------------|
| <b>TITLE and PURPOSE</b>     |    |                                                                                                                                                                                                                                                                                                                                                                                                                                                                                                                                                                                                                   |                    |
| Title                        | 1  | The accuracy of neutrophil to lymphocyte ratio for the diagnosis of neonatal sepsis: a systematic review and meta-analysis.                                                                                                                                                                                                                                                                                                                                                                                                                                                                                       | 1                  |
| Objectives                   | 2  | The purpose of this study was systematically and quantitatively to assess the value of neutrophil to lymphocyte ratio (NLR) for the diagnosis of neonatal sepsis by systematic review and meta-analysis.                                                                                                                                                                                                                                                                                                                                                                                                          | 2                  |
| <b>METHODS</b>               |    |                                                                                                                                                                                                                                                                                                                                                                                                                                                                                                                                                                                                                   |                    |
| Eligibility criteria         | 3  | (1).The purpose of the study is to evaluate or explore the diagnostic value of the neutrophils to lymphocytes ratio in neonatal sepsis; (2).The case group is newborns with confirmed neonatal sepsis, and the control group is newborns with non-neonatal sepsis; (3).The diagnostic gold standard is blood culture (4).It can directly or indirectly obtain the true positive, false positive, true negative, and false negative values of neutrophil-lymphocyte ratio in the diagnosis of neonatal sepsis; (5).The language is English or Chinese.                                                             | 5                  |
| Information sources          | 4  | We searched the Cochrane, PubMed, Embase, Web of Science, CNKI, Wanfang, China Biomedical Literature Database, and VIP Database for studies on the diagnostic accuracy of neonatal sepsis published before August 2021.                                                                                                                                                                                                                                                                                                                                                                                           | 4                  |
| Risk of bias & applicability | 5  | Assess the quality of the Diagnostic Accuracy Studies-2 (QUADAS-2) checklist.                                                                                                                                                                                                                                                                                                                                                                                                                                                                                                                                     | 6-7                |
| Synthesis of results         | A1 | Random effects model.                                                                                                                                                                                                                                                                                                                                                                                                                                                                                                                                                                                             |                    |
| <b>RESULTS</b>               |    |                                                                                                                                                                                                                                                                                                                                                                                                                                                                                                                                                                                                                   |                    |
| Included studies             | 6  | 13 studies were finally included, with 1365 newborns, including 726 in the study group and 639 in the control group. Among them, 3 were late-onset sepsis, 5 were early-onset sepsis, and 2 were preterm infants. Ten studies are from Asia, and three studies are from non-Asia.                                                                                                                                                                                                                                                                                                                                 | 6                  |
| Synthesis of results         | 7  | The pooled sensitivity of the ratio of in the diagnosis of neonatal sepsis was 0.77 (0.71-0.83), the pooled specificity was 0.86 (0.70-0.94), the positive likelihood ratio was 5.6(2.3-13.8), the negative likelihood ratio was 0.26(0.19-0.37), the diagnostic odds ratio was 21(95 % CI 7-69), area under the curve (AUC) was 0.84(0.81-0.87).                                                                                                                                                                                                                                                                 | 7                  |
| <b>DISCUSSION</b>            |    |                                                                                                                                                                                                                                                                                                                                                                                                                                                                                                                                                                                                                   |                    |
| Strengths and limitations    | 9  | (1). Although it is homogeneous to reduce the choice of bias applications, heterogeneity is still in the inclusive research. (2). The diagnosis of newborns will also have differences due to different researchers, which will result in false positive and false negative results for the diagnosis of neonatal sepsis, which in turn leads to bias. (3). A part of the included research is a retrospective study, so there may be a selection of research objects. (4). The included research comes from different countries, and newborns have different immunity in newborns of different races and gender. | 9                  |
| Interpretation               | 10 | The early diagnosis of neonatal sepsis is particularly important. The ratio of neutrophils to lymphocytes has high sensitivity and specificity for its early diagnosis. It can provide a warning for the clinic and take corresponding measures in time.                                                                                                                                                                                                                                                                                                                                                          | 10                 |
| <b>OTHER</b>                 |    |                                                                                                                                                                                                                                                                                                                                                                                                                                                                                                                                                                                                                   |                    |
| Funding                      | 11 | None                                                                                                                                                                                                                                                                                                                                                                                                                                                                                                                                                                                                              |                    |



# PRISMA-DTA for Abstracts Checklist

1  
2  
3  
4  
5  
6  
7  
8  
9  
10  
11  
12  
13  
14  
15  
16  
17  
18  
19  
20  
21  
22  
23  
24  
25  
26  
27  
28  
29  
30  
31  
32  
33  
34  
35  
36  
37  
38  
39  
40  
41  
42  
43  
44  
45  
46  
47

|              |    |                          |  |
|--------------|----|--------------------------|--|
| Registration | 12 | Prospero: CRD42021278881 |  |
|--------------|----|--------------------------|--|

*Adapted From:* McInnes MDF, Moher D, Thombs BD, McGrath TA, Bossuyt PM, The PRISMA-DTA Group (2018). Preferred Reporting Items for a Systematic Review and Meta-analysis of Diagnostic Test Accuracy Studies: The PRISMA-DTA Statement. JAMA. 2018 Jan 23;319(4):388-396. doi: 10.1001/jama.2017.19163.

For more information, visit: [www.prisma-statement.org](http://www.prisma-statement.org).

Page 1 of 1

For peer review only



# PRISMA-DTA Checklist

1  
2  
3  
4  
5  
6  
7  
8  
9  
10  
11  
12  
13  
14  
15  
16  
17  
18  
19  
20  
21  
22  
23  
24  
25  
26  
27  
28  
29  
30  
31  
32  
33  
34  
35  
36  
37  
38  
39  
40  
41  
42  
43  
44  
45  
46  
47

| Section/topic                   | #  | PRISMA-DTA Checklist Item                                                                                                                                                                                                                                                                                                                                                                                                                                                                                                                             | Reported on page # |
|---------------------------------|----|-------------------------------------------------------------------------------------------------------------------------------------------------------------------------------------------------------------------------------------------------------------------------------------------------------------------------------------------------------------------------------------------------------------------------------------------------------------------------------------------------------------------------------------------------------|--------------------|
| <b>TITLE / ABSTRACT</b>         |    |                                                                                                                                                                                                                                                                                                                                                                                                                                                                                                                                                       |                    |
| Title                           | 1  | The accuracy of neutrophil to lymphocyte ratio for the diagnosis of neonatal sepsis: a systematic review and meta-analysis                                                                                                                                                                                                                                                                                                                                                                                                                            | 1                  |
| Abstract                        | 2  | Abstract: See PRISMA-DTA for abstracts.                                                                                                                                                                                                                                                                                                                                                                                                                                                                                                               | /                  |
| <b>INTRODUCTION</b>             |    |                                                                                                                                                                                                                                                                                                                                                                                                                                                                                                                                                       |                    |
| Rationale                       | 3  | The neutrophil to lymphocyte ratio (NLR) is an independent predictor in clinical that has been widely used in various diseases, such as immune system disease, tumors, cancers, etc. Many studies have shown that the ratio of neutrophils to lymphocytes is more reliable for diagnosing neonatal sepsis than neutrophil counts or lymphocyte counts alone. Nevertheless, there still has a dispute about diagnosing the effectiveness of neonatal sepsis.                                                                                           | 2                  |
| Clinical role of index test     | D1 | /                                                                                                                                                                                                                                                                                                                                                                                                                                                                                                                                                     |                    |
| Objectives                      | 4  | The purpose of this study was systematically and quantitatively to assess the value of neutrophil to lymphocyte ratio (NLR) for the diagnosis of neonatal sepsis by systematic review and meta-analysis.                                                                                                                                                                                                                                                                                                                                              | 2                  |
| <b>METHODS</b>                  |    |                                                                                                                                                                                                                                                                                                                                                                                                                                                                                                                                                       |                    |
| Protocol and registration       | 5  | Prospero: CRD42021278881                                                                                                                                                                                                                                                                                                                                                                                                                                                                                                                              |                    |
| Eligibility criteria            | 6  | (1).The purpose of the study is to evaluate (or explore the diagnostic value of the neutrophils to lymphocytes ratio in neonatal sepsis;(2).The case group is newborns with confirmed neonatal sepsis, and the control group is newborns with non-neonatal sepsis; (3).The diagnostic gold standard is blood culture (4).It can directly or indirectly obtain the true positive, false positive, true negative, and false negative values of neutrophil-lymphocyte ratio in the diagnosis of neonatal sepsis; (5).The language is English or Chinese. | 5                  |
| Information sources             | 7  | We searched the Cochrane, PubMed, Embase, Web of Science, CNKI, Wanfang, China Biomedical Literature Database, and VIP Database for studies on the diagnostic accuracy of neonatal sepsis published before August 2021.                                                                                                                                                                                                                                                                                                                               | 4                  |
| Search                          | 8  | We used a combination of subject words and free words to search the study and the following keywords: "Neutrophil and lymphocyte ratio," "Infant," "Newborn," "Neonate," "sepsis," "septicemia," "Neonatal Sepsis.                                                                                                                                                                                                                                                                                                                                    | 4                  |
| Study selection                 | 9  | Two reviewers independently screened the literature, extracted data and evaluated the included studies according to the inclusion criteria,exclusion criteria and methodological quality. In case of disagreement, discuss and resolve or hand over to a third party assist in ruling.                                                                                                                                                                                                                                                                | 5                  |
| Data collection process         | 10 | Two researchers extract the data according to the designed data extraction table, and finally cross-check the extraction situation. If there is any difference, it will be resolved through discussion and negotiation.                                                                                                                                                                                                                                                                                                                               | 5                  |
| Definitions for data extraction | 11 | There are two authors independently extracted data from the included literature, including the year of publication, country of origin, study design, author, publication year, Newborn birth situation, study location, sample size, case and control numbers, cut-off value, true positive value, false-positive value, false-negative value, true negative value, sensitivity, and specificity.                                                                                                                                                     | 5                  |
| Risk of bias and applicability  | 12 | Assess the quality of the Diagnostic Accuracy Studies-2 (QUADAS-2) checklist.<br>For peer review only - <a href="http://bmjopen.bmj.com/site/about/guidelines.xhtml">http://bmjopen.bmj.com/site/about/guidelines.xhtml</a>                                                                                                                                                                                                                                                                                                                           | 6                  |



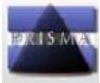

# PRISMA-DTA Checklist

1  
2  
3  
4  
5  
6  
7  
8  
9  
10  
11  
12  
13  
14  
15  
16  
17  
18  
19  
20  
21  
22  
23  
24  
25  
26  
27  
28  
29  
30  
31  
32  
33  
34  
35  
36  
37  
38  
39  
40  
41  
42  
43  
44  
45  
46  
47

|                              |    |                                                                                                                                                                                                                                                                                                                                                                                                                                                                                                                                                                                                                                                                                                                                                                                                                                                                                                                                                                                                                                                                                                                                     |     |
|------------------------------|----|-------------------------------------------------------------------------------------------------------------------------------------------------------------------------------------------------------------------------------------------------------------------------------------------------------------------------------------------------------------------------------------------------------------------------------------------------------------------------------------------------------------------------------------------------------------------------------------------------------------------------------------------------------------------------------------------------------------------------------------------------------------------------------------------------------------------------------------------------------------------------------------------------------------------------------------------------------------------------------------------------------------------------------------------------------------------------------------------------------------------------------------|-----|
| Diagnostic accuracy measures | 13 | ROC curve analysis was used for the included studies to calculate the combined sensitivity, specificity, positive likelihood ratio, negative likelihood ratio, diagnostic odds ratio, and area under the curve (AUC). All results were expressed with 95% CI.                                                                                                                                                                                                                                                                                                                                                                                                                                                                                                                                                                                                                                                                                                                                                                                                                                                                       | 5-6 |
| Synthesis of results         | 14 | The $I^2$ test evaluated study heterogeneity. $I^2 > 50\%$ indicated that the heterogeneity generated in the study would have a specific impact. Meta Disc1.4 software was used to analyze the threshold effect heterogeneity. If the effect sizes of the studies are homogeneous, the fixed-effects model will be used; if they are heterogeneous, the random-effects model will be used. If there is heterogeneity between the studies, the source of the heterogeneity shall be further explored, and the threshold effect and non-threshold effect analysis shall be carried out. The combined sensitivity, combined specificity, combined diagnostic odds ratio (DOR), combined positive likelihood ratio (PLR), combined negative likelihood ratio, and its 95% confidence interval (95%CI) were performed through stata16.0; Simultaneously perform a combined receiver operating characteristic curve (SROC) fitting analysis. At the same time, the Deeks test was used to evaluate the publication bias of the included literature. If $P < 0.05$ , it is considered that the included literature has a publication bias. | 5-6 |

Page 1 of 2

| Section/topic                  | #  | PRISMA-DTA Checklist Item                                                                                                                                                                                                                                                                                                                                                                                                                                                                                                                                                                                                                                                                                                                                                                                            | Reported on page # |
|--------------------------------|----|----------------------------------------------------------------------------------------------------------------------------------------------------------------------------------------------------------------------------------------------------------------------------------------------------------------------------------------------------------------------------------------------------------------------------------------------------------------------------------------------------------------------------------------------------------------------------------------------------------------------------------------------------------------------------------------------------------------------------------------------------------------------------------------------------------------------|--------------------|
| Meta-analysis                  | D2 | Reference no. 14                                                                                                                                                                                                                                                                                                                                                                                                                                                                                                                                                                                                                                                                                                                                                                                                     |                    |
| Additional analyses            | 16 | We conducted subgroup analysis on the early-onset sepsis group, cutoff>2, and cutoff<2, respectively. The sensitivity analysis was performed by excluding premature infants, non-Asian, and late-onset sepsis to explore the heterogeneity, meta-regression analysis of year, region, Study type and birth status of newborn.                                                                                                                                                                                                                                                                                                                                                                                                                                                                                        | 7-8                |
| <b>RESULTS</b>                 |    |                                                                                                                                                                                                                                                                                                                                                                                                                                                                                                                                                                                                                                                                                                                                                                                                                      |                    |
| Study selection                | 17 | Preliminary retrieval of 740 pieces of literature, after checking duplicates and reading abstracts, and excluding relevant literature according to the exclusion criteria, 13 studies were finally included. The specific process is shown in (Fig1).                                                                                                                                                                                                                                                                                                                                                                                                                                                                                                                                                                | 6                  |
| Study characteristics          | 18 | The references were included from 2017 to 2021, with 1365 newborns, including 726 in the study group and 639 in the control group. Among them, 3 were late-onset sepsis, 5 were early-onset sepsis, and 2 were preterm infants. Ten studies are from Asia, and three studies are from non-Asia. Basic information of the included literature is shown in (Table 1).                                                                                                                                                                                                                                                                                                                                                                                                                                                  | 6                  |
| Risk of bias and applicability | 19 | The evaluation results of the risk of bias of the included studies are shown in (Fig2、3).                                                                                                                                                                                                                                                                                                                                                                                                                                                                                                                                                                                                                                                                                                                            | 7                  |
| Results of individual studies  | 20 | The research results are displayed in the form of tables and forest diagrams                                                                                                                                                                                                                                                                                                                                                                                                                                                                                                                                                                                                                                                                                                                                         |                    |
| Synthesis of results           | 21 | we found that the sensitivity and specificity of $I^2$ are respectively 68.61% and 90.87%. This indicates that there is considerable heterogeneity. We first conducted a threshold effect test. By using metadisc14.0, we found that the Spearman correlation coefficient was -0.093 $p = 0.762$ ( $p > 0.05$ ). Furthermore, the Proportion of heterogeneity is likely due to threshold effect = 0.23 in stata16.0. It shows no threshold effect heterogeneity, The pooled sensitivity and specificity of neutrophil to lymphocyte ratio in the diagnosis of neonates were 0.77 (95 % CI 0.71-0.83) and 0.86 (95 % CI 0.70-0.94), respectively; PLR was 5.6 (95 % CI 2.3-13.8), and NLR was 0.26 (95 % CI 0.19-0.37), DOR is 21(95 % CI 7-69), area under the curve (AUC) is 0.84(95 % CI 0.81-0.87) (Fig 4,5,6,7). | 7-8                |



# PRISMA-DTA Checklist

1  
2  
3  
4  
5  
6  
7  
8  
9  
10  
11  
12  
13  
14  
15  
16  
17  
18  
19  
20  
21  
22  
23  
24  
25  
26  
27  
28  
29  
30  
31  
32  
33  
34  
35  
36  
37  
38  
39  
40  
41  
42  
43  
44  
45  
46  
47

|                     |    |                                                                                                                                                                                                                                                                                                                                                                                                                                                                                                                                                                                                                                                                                                                                                                                                                                                                                                                                                                                                                                                                                                                                                                                                                                                                                                                              |     |
|---------------------|----|------------------------------------------------------------------------------------------------------------------------------------------------------------------------------------------------------------------------------------------------------------------------------------------------------------------------------------------------------------------------------------------------------------------------------------------------------------------------------------------------------------------------------------------------------------------------------------------------------------------------------------------------------------------------------------------------------------------------------------------------------------------------------------------------------------------------------------------------------------------------------------------------------------------------------------------------------------------------------------------------------------------------------------------------------------------------------------------------------------------------------------------------------------------------------------------------------------------------------------------------------------------------------------------------------------------------------|-----|
| Additional analysis | 23 | <p>The meta-regression results show that articles in non-Asian regions are the main source of heterogeneity (Table 2). Sensitivity analysis removes non-Asian, preterm, and late-onset sepsis research literature results also show that the region is the main source of heterogeneity. (Table 3)</p> <p>(1).The results of the EOS subgroup analysis showed that the pooled sensitivity and specificity of the neutrophil to lymphocyte ratio in the diagnosis of neonatal sepsis were 0.83 (95 % CI 0.68-0.91) and 0.99 (95 % CI 0.78-1.00); PLR was 91.3 (95 % CI 3.0-2823.6), NLR was 0.18 (95 % CI 0.09-0.34), DOR was 519 (95 % CI 14-19952), and the area under the curve (AUC) was 0.95 (95 % CI 0.93-0.97).</p> <p>(2).Cutoff value &gt;2, pooled sensitivity and specificity are respectively 0.83(95 % CI 0.66-0.93) and 0.80(95 % CI 0.44-0.95) respectively; PLR is 4.1(95 % CI 1.0-17.2), NLR is 0.21(95 % CI 0.07-0.60), DOR is 20 (95 % CI 2-218), the area under the curve (AUC) is 0.88 (95 % CI 0.85-0.91).</p> <p>(3).Cutoff value &lt;2, pooled sensitivity and specificity are respectively 0.74(95 % CI 0.69-0.78) and 0.90(95 % CI 0.71-0.97); PLR is 7.1(95 % CI 2.3-21.8), NLR is 0.29(95 % CI 0.23-0.36), DOR is 25(95 % CI 7-88) The area under the curve (AUC) is 0.77(95 % CI 0.73-0.81).</p> | 7-8 |
| <b>DISCUSSION</b>   |    |                                                                                                                                                                                                                                                                                                                                                                                                                                                                                                                                                                                                                                                                                                                                                                                                                                                                                                                                                                                                                                                                                                                                                                                                                                                                                                                              |     |
| Summary of evidence | 24 | <p>A total of 13 studies comprising 1365 newborns were involved in this meta-analysis. The pooled sensitivity of the ratio of in the diagnosis of neonatal sepsis was 0.77 (95 % confidence interval [CI]: 0.71-0.83), the pooled specificity was 0.86 (95 % CI 0.70-0.94), the positive likelihood ratio was 5.6(95 % CI 2.3-13.8), the negative likelihood ratio was 0.26(95 % CI 0.19-0.37), the diagnostic odds ratio was 21(95 % CI 7-69), area under the curve (AUC) was 0.84(95 % CI 0.81-0.87). The results show that the ratio of neutrophils to lymphocytes has moderate diagnostic value for neonatal sepsis.</p>                                                                                                                                                                                                                                                                                                                                                                                                                                                                                                                                                                                                                                                                                                 | 8-9 |
| Limitations         | 25 | <p>(1). Although it is homogeneous to reduce the choice of bias applications, heterogeneity is still in the inclusive research. (2). The diagnosis of newborns will also have differences due to different researchers, which will result in false positive and false negative results for the diagnosis of neonatal sepsis, which in turn leads to bias. (3). A part of the included research is a retrospective study, so there may be a selection of research objects. (4). The included research comes from different countries, and newborns have different immunity in newborns of different races and gender.</p>                                                                                                                                                                                                                                                                                                                                                                                                                                                                                                                                                                                                                                                                                                     | 9   |
| Conclusions         | 26 | <p>The neutrophils to lymphocytes ratio is moderate diagnostic capacity with high sensitivity and specificity for diagnosing neonatal sepsis. It can provide a reference value for the early diagnosis of neonatal sepsis.</p>                                                                                                                                                                                                                                                                                                                                                                                                                                                                                                                                                                                                                                                                                                                                                                                                                                                                                                                                                                                                                                                                                               | 10  |
| <b>FUNDING</b>      |    |                                                                                                                                                                                                                                                                                                                                                                                                                                                                                                                                                                                                                                                                                                                                                                                                                                                                                                                                                                                                                                                                                                                                                                                                                                                                                                                              |     |
| Funding             | 27 | None                                                                                                                                                                                                                                                                                                                                                                                                                                                                                                                                                                                                                                                                                                                                                                                                                                                                                                                                                                                                                                                                                                                                                                                                                                                                                                                         |     |

Adapted From: McInnes MDF, Moher D, Thombs BD, McGrath TA, Bossuyt PM, The PRISMA-DTA Group (2018). Preferred Reporting Items for a Systematic Review and Meta-analysis of Diagnostic Test Accuracy Studies: The PRISMA-DTA Statement. JAMA. 2018 Jan 23;319(4):388-396. doi: 10.1001/jama.2017.19163.

For more information, visit: [www.prisma-statement.org](http://www.prisma-statement.org).
