# Supplementary material for: Accuracy of the neutrophil-to-lymphocyte ratio for the diagnosis of neonatal sepsis: a systematic review and meta-analysis
Source: PubMed Central journal article supplement — BMJ Open. 2022 Dec 14;12(12):e060391. doi: 10.1136/bmjopen-2021-060391 (PMC9756154; doi:10.1136/bmjopen-2021-060391), 2022-12-14
Supplement: bmjopen-2021-060391supp001.pdf [file bmjopen-2021-060391supp001.pdf]

### Detailed retrieval strategy

|                       |                                                                                                                                                                                                                                                                                                                                                                                                                                                                                                                                                                                                                                                                                                                                                                                                                                                                                                                    |
|-----------------------|--------------------------------------------------------------------------------------------------------------------------------------------------------------------------------------------------------------------------------------------------------------------------------------------------------------------------------------------------------------------------------------------------------------------------------------------------------------------------------------------------------------------------------------------------------------------------------------------------------------------------------------------------------------------------------------------------------------------------------------------------------------------------------------------------------------------------------------------------------------------------------------------------------------------|
| <b>Database</b>       | Pubmed                                                                                                                                                                                                                                                                                                                                                                                                                                                                                                                                                                                                                                                                                                                                                                                                                                                                                                             |
| <b>Website</b>        | <a href="https://pubmed.ncbi.nlm.nih.gov">https://pubmed.ncbi.nlm.nih.gov</a>                                                                                                                                                                                                                                                                                                                                                                                                                                                                                                                                                                                                                                                                                                                                                                                                                                      |
| <b>Time</b>           | database building - 2022.06.28                                                                                                                                                                                                                                                                                                                                                                                                                                                                                                                                                                                                                                                                                                                                                                                                                                                                                     |
| <b>Results</b>        | 27                                                                                                                                                                                                                                                                                                                                                                                                                                                                                                                                                                                                                                                                                                                                                                                                                                                                                                                 |
| <b>Search details</b> | Search: (((nlr[Title/Abstract]) OR (Neutrophil to lymphocyte ratio[Title/Abstract])) OR ("Neutrophil and lymphocyte ratio"[Title/Abstract])) AND (((((Infant, Newborn[Title/Abstract]) OR (Newborn Infant[Title/Abstract])) OR (Newborn[Title/Abstract])) OR (Neonate[Title/Abstract])) OR ("Infant, Newborn"[Mesh])) AND (((((((Sepsis, Neonatal Late-Onset[Title/Abstract]) OR (Neonatal Sepses[Title/Abstract])) OR (Neonatal Sepsis[Title/Abstract])) OR (Early Onset Sepsis[Title/Abstract])) OR (Sepsis, Neonatal Early-Onset[Title/Abstract])) OR (LOS[Title/Abstract])) OR (EOS[Title/Abstract])) OR ("Neonatal Sepsis"[Mesh])) OR (((((((sepsis[Title/Abstract]) OR (Bloodstream Infection[Title/Abstract])) OR (Pyohemia[Title/Abstract])) OR (Pyemia[Title/Abstract])) OR (Septicemia[Title/Abstract])) OR (Poisoning, Blood[Title/Abstract])) OR (Severe Sepsis[Title/Abstract])) OR ("Sepsis"[Mesh])) |
| <b>Database</b>       | Embase                                                                                                                                                                                                                                                                                                                                                                                                                                                                                                                                                                                                                                                                                                                                                                                                                                                                                                             |
| <b>Website</b>        | <a href="https://www.embase.com">https://www.embase.com</a>                                                                                                                                                                                                                                                                                                                                                                                                                                                                                                                                                                                                                                                                                                                                                                                                                                                        |
| <b>Time</b>           | database building - 2022.06.28                                                                                                                                                                                                                                                                                                                                                                                                                                                                                                                                                                                                                                                                                                                                                                                                                                                                                     |
| <b>Results</b>        | 47                                                                                                                                                                                                                                                                                                                                                                                                                                                                                                                                                                                                                                                                                                                                                                                                                                                                                                                 |
| <b>Search details</b> | No. Query<br>#33: #10 AND #30 AND #32<br>#32: #1 OR #2 OR #3 OR #31<br>#31 : 'neutrophil lymphocyte ratio'/exp<br>#30: 'neutrophil lymphocyte ratio'/exp<br>#29 : #20 OR #21 OR #22 OR #23 OR #24 OR #25 OR #26 OR #27 OR #28<br>#28 : 'eos':ab,ti<br>#27 : 'los':ab,ti<br>#26 : 'sepsis, neonatal early-onset':ab,ti<br>#25 : 'early onset sepsis':ab,ti<br>#24 : 'sepsis, neonatal late-onset':ab,ti<br>#23 : 'neonatal sepsis':ab,ti<br>#22 : 'neonatal sepsis':ab,ti<br>#21 : 'newborn sepsis':ab,ti<br>#20 : 'newborn sepsis'/exp<br>#19 : #11 OR #12 OR #13 OR #14 OR #15 OR #16 OR #17 OR #18<br>#18 : 'severe sepsis':ab,ti<br>#17 : 'poisoning, blood':ab,ti<br>#16 : 'septicemia':ab,ti<br>#15 : 'pyohemia':ab,ti<br>#14 : 'pyohemia':ab,ti<br>#13 : 'bloodstream infection':ab,ti<br>#12 : 'sepsis':ab,ti                                                                                               |

|                       |                                                                                                                                                                                                                                                                                                                                                                                                                                                                                                                                                                                                                                                                                                                                                                                                                                                                                                                                                                                                                                                                                                     |
|-----------------------|-----------------------------------------------------------------------------------------------------------------------------------------------------------------------------------------------------------------------------------------------------------------------------------------------------------------------------------------------------------------------------------------------------------------------------------------------------------------------------------------------------------------------------------------------------------------------------------------------------------------------------------------------------------------------------------------------------------------------------------------------------------------------------------------------------------------------------------------------------------------------------------------------------------------------------------------------------------------------------------------------------------------------------------------------------------------------------------------------------|
|                       | <p>#11 : 'sepsis'/exp<br/> #10 : #5 OR #6 OR #7 OR #8<br/> #9 : 'neonate':ab,ti<br/> #8 : 'newborn':ab,ti<br/> #7 : 'newborn infant':ab,ti<br/> #6 : 'newborn':ab,ti<br/> #5 : 'newborn'/exp<br/> #4 : #1 OR #2 OR #3<br/> #3 : 'nlr':ab,ti<br/> #2 : 'neutrophil to lymphocyte ratio':ab,ti<br/> #1 : 'neutrophil and lymphocyte ratio':ab,ti</p>                                                                                                                                                                                                                                                                                                                                                                                                                                                                                                                                                                                                                                                                                                                                                  |
| <b>Database</b>       | Web of science                                                                                                                                                                                                                                                                                                                                                                                                                                                                                                                                                                                                                                                                                                                                                                                                                                                                                                                                                                                                                                                                                      |
| <b>Website</b>        | <a href="http://www.webofscience.com">http://www.webofscience.com</a>                                                                                                                                                                                                                                                                                                                                                                                                                                                                                                                                                                                                                                                                                                                                                                                                                                                                                                                                                                                                                               |
| <b>Time</b>           | database building - 2022.06.28                                                                                                                                                                                                                                                                                                                                                                                                                                                                                                                                                                                                                                                                                                                                                                                                                                                                                                                                                                                                                                                                      |
| <b>Results</b>        | 36                                                                                                                                                                                                                                                                                                                                                                                                                                                                                                                                                                                                                                                                                                                                                                                                                                                                                                                                                                                                                                                                                                  |
| <b>Search details</b> | <p>#1 (((((((((((((TS=(Neonatal Sepsis)) OR TS=(Neonatal sepsis)) OR TS=(Sepsis, Neonatal Late-Onset)) OR TS=(Early Onset Sepsis)) OR TS=(Sepsis, Neonatal Early-Onset)) OR TS=(los)) OR TS=(eos)) OR TS=(sepsis)) OR TS=(Bloodstream Infection)) OR TS=(pyohemie)) OR TS=(pyaemic)) OR TS=(Septicemia)) OR TS=(Poisoning, Blood)) OR TS=(Severe Sepsis)<br/> #2 TS=(Neutrophil and lymphocyte ratio) or TS=(Neutrophil to lymphocyte ratio) or TS=(nlr)<br/> #3 ((TS=(Infant, Newborn)) OR TS=(Newborn Infant)) OR TS=(Newborn)) OR TS=(Neonate)<br/> #1 and #2 and #3</p>                                                                                                                                                                                                                                                                                                                                                                                                                                                                                                                         |
| <b>Database</b>       | Cochrane                                                                                                                                                                                                                                                                                                                                                                                                                                                                                                                                                                                                                                                                                                                                                                                                                                                                                                                                                                                                                                                                                            |
| <b>Website</b>        | <a href="https://www.cochrane.org">https://www.cochrane.org</a>                                                                                                                                                                                                                                                                                                                                                                                                                                                                                                                                                                                                                                                                                                                                                                                                                                                                                                                                                                                                                                     |
| <b>Time</b>           | database building - 2022.06.28                                                                                                                                                                                                                                                                                                                                                                                                                                                                                                                                                                                                                                                                                                                                                                                                                                                                                                                                                                                                                                                                      |
| <b>Results</b>        | 30                                                                                                                                                                                                                                                                                                                                                                                                                                                                                                                                                                                                                                                                                                                                                                                                                                                                                                                                                                                                                                                                                                  |
| <b>Search details</b> | <p>ID Search Hits<br/> #1 MeSH descriptor: [Neonatal Sepsis] explode all trees 86<br/> #2 (Neonatal Sepsis):ti,ab,kw OR (Sepsis, Neonatal Late-Onset):ti,ab,kw OR (Neonatal Sepses):ti,ab,kw OR (Early Onset Sepsis):ti,ab,kw OR (Sepsis, Neonatal Early-Onset):ti,ab,kw (Word variations have been searched) 2151<br/> #3 (LOS):ti,ab,kw OR (EOS):ti,ab,kw (Word variations have been searched) 15529<br/> #4 #1 or #2 or #3 17494<br/> #5 MeSH descriptor: [Sepsis] explode all trees 4918<br/> #6 (sepsis):ti,ab,kw OR (Bloodstream Infection):ti,ab,kw OR (Pyohemia):ti,ab,kw OR (Pyaemia):ti,ab,kw OR (Septicemia):ti,ab,kw (Word variations have been searched) 13925<br/> #7 (Poisoning, Blood):ti,ab,kw OR (Severe Sepsis):ti,ab,kw (Word variations have been searched) 4942<br/> #8 #5 or #6 or #7 16646<br/> #9 #4 or #8 31666<br/> #10 MeSH descriptor: [Infant, Newborn] explode all trees 17498<br/> #11 (Infant, Newborn):ti,ab,kw OR (Newborn Infant):ti,ab,kw OR (Newborn):ti,ab,kw OR (Neonate):ti,ab,kw (Word variations have been searched) 40837<br/> #12 #10 or #11 40928</p> |

|                       |                                                                                                                                                                                                     |
|-----------------------|-----------------------------------------------------------------------------------------------------------------------------------------------------------------------------------------------------|
|                       | #13 (Neutrophil and lymphocyte ratio):ti,ab,kw OR (Neutrophil to lymphocyte ratio):ti,ab,kw OR (nlr):ti,ab,kw (Word variations have been searched) 915<br>#14 #9 or #12 68896<br>#15 #14 and #13 30 |
| <b>Database</b>       | CNKI ( <i>Chinese database</i> )                                                                                                                                                                    |
| <b>Website</b>        | <a href="https://www.cnki.net">https://www.cnki.net</a>                                                                                                                                             |
| <b>Time</b>           | database building - 2022.06.28                                                                                                                                                                      |
| <b>Results</b>        | 195                                                                                                                                                                                                 |
| <b>Search detail</b>  | (主题=脓毒症 + 败血症 + 新生儿败血症 + 血流感染 + 早发性败血症 + 迟发性败血症 + 血液中毒 + 新生儿脓毒症) AND (主题=中性粒淋巴细胞比 + nlr)                                                                                                            |
| <b>Database</b>       | Wanfang ( <i>Chinese database</i> )                                                                                                                                                                 |
| <b>Website</b>        | <a href="https://www.wanfangdata.com.cn/index.html">https://www.wanfangdata.com.cn/index.html</a>                                                                                                   |
| <b>Time</b>           | database building - 2022.06.28                                                                                                                                                                      |
| <b>Results</b>        | 319                                                                                                                                                                                                 |
| <b>Search details</b> | 检索表达式(中英文扩展&主题词扩展): 主题:(新生儿败血症 or 败血症 or 新生儿脓毒症 or 脓毒症 or 早发性败血症 or 迟发性败血症 or 血流感染 ) and 主题:(中性粒淋巴细胞比值 or nlr)                                                                                      |
| <b>Database</b>       | China Biomedical Literature Database ( <i>Chinese database</i> )                                                                                                                                    |
| <b>Website</b>        | <a href="http://www.sinomed.ac.cn/index.jsp">http://www.sinomed.ac.cn/index.jsp</a>                                                                                                                 |
| <b>Time</b>           | database building - 2022.06.28                                                                                                                                                                      |
| <b>Results</b>        | 137                                                                                                                                                                                                 |
| <b>Search details</b> | (("中性粒淋巴细胞比值"[常用字段:智能] OR "nlr"[常用字段:智能])) AND (("脓毒症"[常用字段:智能] OR "败血症"[常用字段:智能] OR "新生儿脓毒症"[常用字段:智能] OR "新生儿败血症"[常用字段:智能] OR "早发性败血症"[常用字段:智能] OR "迟发性败血症"[常用字段:智能] or "血流感染"[常用字段:智能]))          |
| <b>Database</b>       | VIP Database ( <i>Chinese database</i> )                                                                                                                                                            |
| <b>Website</b>        | <a href="http://qikan.cqvip.com">http://qikan.cqvip.com</a>                                                                                                                                         |
| <b>Time</b>           | database building - 2022.06.28                                                                                                                                                                      |
| <b>Results</b>        | 43                                                                                                                                                                                                  |
| <b>Search details</b> | 检索表达式(主题词扩展): 主题:(新生儿败血症 or 败血症 or 新生儿脓毒症 or 脓毒症 or 早发性败血症 or 迟发性败血症 or 血流感染 ) and 主题:(中性粒淋巴细胞比值 or nlr)                                                                                            |
