# Supplementary material for: Accuracy of the neutrophil-to-lymphocyte ratio for the diagnosis of neonatal sepsis: a systematic review and meta-analysis
Source: PubMed Central journal article supplement — BMJ Open. 2022 Dec 14;12(12):e060391. doi: 10.1136/bmjopen-2021-060391 (PMC9756154; doi:10.1136/bmjopen-2021-060391), 2022-12-14
Supplement: bmjopen-2021-060391supp002.pdf [file bmjopen-2021-060391supp002.pdf]

**Table 1 characteristics of the included 14 studies.**

| Author                     | Year | Selected time | Study design          | Sepsis diagnosis | Region      | Early /Late | Case/C ontrol | T P | F P | F N | T N | SE   | SP   | Cut off | Neonates   |
|----------------------------|------|---------------|-----------------------|------------------|-------------|-------------|---------------|-----|-----|-----|-----|------|------|---------|------------|
| R H Ruslie [1]             | 2018 | 2016-2017     | Retrospective         | Blood culture    | USA         | EOS、<br>LOS | 52/42         | 32  | 14  | 20  | 28  | 61.5 | 66.7 | 9.4     | A、 B、<br>C |
| Senem Alkan Ozdemir [2]    | 2017 | 2014-2015     | Prospective           | Blood culture    | Turkey      | LOS         | 52/75         | 38  | 16  | 14  | 58  | 73   | 78   | 1.77    | A          |
| Ori Goldberg [3]           | 2020 | 2016-2019     | Retrospective         | Blood culture    | Israel      | LOS         | 31/62         | 26  | 13  | 5   | 49  | 83.9 | 79   | 1.5     | A、 B、<br>C |
| Rocky Wilar, MD [4]        | 2018 | 2017-2017     | Cross-sectional study | Blood culture    | Indonesia   | EOS         | 90/30         | 75  | 2   | 15  | 28  | 83.3 | 93.3 | 1.24    | A、 B、<br>C |
| Khadijah Rizky Sumitro [5] | 2021 | 2019-2019     | Cross-sectional study | Blood culture    | Indonesia   | EOS、<br>LOS | 52/52         | 42  | 30  | 10  | 22  | 80.8 | 42.3 | 2.12    | A、 B、<br>C |
| Xiaoyu Du [6]              | 2019 | 2015-2017     | Retrospective         | Blood culture    | China       | EOS、<br>LOS | 58/30         | 43  | 6   | 15  | 24  | 73.3 | 81   | 0.7     | NA         |
| Shujian Zhang [7]          | 2021 | 2018-2020     | Descriptive study     | Blood culture    | China       | EOS         | 74/50         | 57  | 11  | 17  | 39  | 77   | 78   | 3.16    | A、 B、<br>C |
| Santosh K. Panda [8]       | 2021 | 2018-2018     | Retrospective         | Blood culture    | Philippines | EOS、<br>LOS | 41/52         | 28  | 28  | 13  | 24  | 68.3 | 46.2 | 1.7     | A、 B、<br>C |
| Emrah Can, MD [9]          | 2017 | 2015-2017     | Prospective           | Blood culture    | Turkey      | EOS         | 78/44         | 76  | 0   | 2   | 44  | 97.4 | 100  | 6.76    | B          |
| Nagwa Mohamed, SAM [10]    | 2020 | 2018-2019     | Prospective           | Blood culture    | Egypt       | EOS         | 40/40         | 27  | 0   | 13  | 40  | 67   | 99   | 0.1     | B          |
| Sara Mohamed Mira [11]     | 2021 | 2018-2019     | Retrospective         | Blood culture    | Egypt       | EOS         | 60/60         | 43  | 0   | 17  | 60  | 72   | 100  | 1       | A、 B       |
| Ipek Guney Varal [12]      | 2020 | 2016-2018     | Retrospective         | Blood culture    | Turkey      | LOS         | 76/40         | 52  | 7   | 24  | 33  | 68   | 82   | 1.57    | A          |
| Heriyanto Lim [13]         | 2021 | 2018-2018     | Retrospective         | Blood culture    | Indonesia   | EOS、<br>LOS | 22/62         | 18  | 21  | 4   | 41  | 81.8 | 66.1 | 2.31    | A、 B       |

|                    |      |           |               |               |        |      |       |   |   |    |    |     |      |      |    |
|--------------------|------|-----------|---------------|---------------|--------|------|-------|---|---|----|----|-----|------|------|----|
| Abdullah Kurt [14] | 2022 | 2016-2018 | Retrospective | Blood culture | Turkey | EOS、 | 57/77 | 5 | 1 | 52 | 76 | 8.8 | 98.7 | 4.79 | NA |
|                    |      |           |               |               |        | LOS  |       |   |   |    |    |     |      |      |    |
|                    |      |           |               |               |        | EOS  | 20/77 | 3 | 1 | 17 | 76 | 15  | 98.7 | 4.79 |    |
|                    |      |           |               |               |        | LOS  | 37/77 | 2 | 1 | 35 | 76 | 5.4 | 98.7 | 4.94 |    |

**Note:** EOS: Early-onset sepsis, LOS: Late-onset sepsis, A: Preterm, B: Term, C: Late term, NA:Not Available, TP: true positive, FP: false positive, TN: true negative, FN: false negative, SEN: sensitivity, SPE: specificity.

### Reference

- [1] Ruslie R H, Tjipta D G, Samosir C T, et al. Bacterial pattern, and role of laboratory parameters as marker for neonatal sepsis[C]//IOP Conference Series: Earth and Environmental Science. *IOP Publishing*, 2018, 125(1): 012057.
- [2] Alkan Ozdemir S ,S, Arun Ozer E , Ilhan O , et al. Can neutrophil to lymphocyte ratio predict late-onset sepsis in preterm infants?[infants? [J]. *Journal of Clinical Laboratory Analysis*, 2017:e22338.
- [3] Goldberg O, Amitai N, Chodick G, et al. Can we improve early identification of neonatal late-onset sepsis? A validated prediction model[J]. *Journal of Perinatology*, 2020, 40(9): p. 1315-1322.

- [4] Wilar R. Diagnostic value of eosinopenia and neutrophil to lymphocyte ratio on early onset neonatal sepsis[J]. *Korean Journal of Pediatrics*, 2018, 62(6): p. 217-223.
- [5] Sumitro K R , Utomo M T , Widodo A . Neutrophil-to-Lymphocyte Ratio as an Alternative Marker of Neonatal Sepsis in Developing Countries[J]. *Oman Medical Journal*, 2021, 36(1):e214-e214.
- [6] Du xiaoyu,Ai liang. Changes and clinical significance of NLR, CRP and PCT in neonates with sepsis. *Experimental and Laboratory Medicine*,2019.37(01): p.110-112.
- [7] Zhang, S.J.Platelet-to-Lymphocyte and Neutrophil-to-Lymphocyte Ratio as Predictive Biomarkers for Early-onset Neonatal Sepsis. *Jcpsp-Journal of the College of Physicians and Surgeons Pakistan*, 2021. 31(7): p. 821-824.
- [8] Panda S K, Nayak M K, Rath S, et al. The Utility of the Neutrophil-Lymphocyte Ratio as an Early Diagnostic Marker in Neonatal Sepsis[J]. *Cureus*, 2021, 13(1): e12891.
- [9] E.C, H.S,C.C,et al.The Value of Neutrophil to Lymphocyte Ratio and Platelet to Lymphocyte Ratio for Detecting Early-onset Neonatal Sepsis. *Journal of pediatric hematology/oncology*, 2018. 40(4) E229-E232.

- [10] Mahmoud N M S A, Baheeg G, Abdelhakeem M, et al. Platelet to Lymphocyte Ratio and Neutrophil to Lymphocyte Ratio as New Diagnostic Markers for Detection of Early-onset Neonatal Sepsis in Full-term Newborns. 2019.
- [11] Mira S M, Alkhalegy H A, Abd-Elraheem S I, et al. Neutrophil and Platelet to Lymphocyte Ratio for Detecting Early-onset Neonatal Sepsis[J]. *International Journal of Medical Arts*, 2021, 3(2): 1274-1281.
- [12] Varal I, Dogan P. Can neutrophil-lymphocyte ratio be a predictor of late-onset sepsis in preterm infants? [J]. *Annals of Medical Research*, 2020, 27(1):23.
- [13] Lim, H. Sukmawati. M, Artana. W. D, et al. Validity of neutrophil lymphocyte count ratio in neonatal sepsis. *International Journal of Health Sciences*, (2021).5(2), 53-61.
- [14] Kurt A, Tosun MS, Altuntaş N: Diagnostic accuracy of complete blood cell count and neutrophil-to-lymphocyte, lymphocyte-to-monocyte, and platelet-to-lymphocyte ratios for neonatal infection. *Asian Biomedicine* 2022, 16(1):43-52.
