# Supplementary material for: Accuracy of the neutrophil-to-lymphocyte ratio for the diagnosis of neonatal sepsis: a systematic review and meta-analysis
Source: PubMed Central journal article supplement — BMJ Open. 2022 Dec 14;12(12):e060391. doi: 10.1136/bmjopen-2021-060391 (PMC9756154; doi:10.1136/bmjopen-2021-060391), 2022-12-14
Supplement: bmjopen-2021-060391supp003.pdf [file bmjopen-2021-060391supp003.pdf]

**Table 2 The result of meta-regression****Sensitivity and Specificity**

| Parameter   | Category            | Studies | Sen  | P1   | Spe  | P2   |
|-------------|---------------------|---------|------|------|------|------|
| Asia        | Yes                 | 11      | 0.75 | 0.92 | 0.84 | 0.28 |
|             | No                  | 3       | 0.67 |      | 0.98 |      |
| Year (2019) | Yes ( $\geq 2019$ ) | 10      | 0.69 | 0.08 | 0.87 | 0.87 |
|             | No ( $< 2019$ )     | 4       | 0.83 |      | 0.91 |      |
| Preterm     | Yes                 | 2       | 0.71 | 0.73 | 0.81 | 0.91 |
|             | No                  | 12      | 0.74 |      | 0.89 |      |
| Prospective | Yes                 | 3       | 0.84 | 0.62 | 0.98 | 0.01 |
|             | No                  | 11      | 0.70 |      | 0.83 |      |

**Joint Model**

| Parameter   | Category            | LRTChi <sup>2</sup> | <i>P</i> value | <i>I</i> <sup>2</sup> | <i>I</i> <sup>2</sup> lo | <i>I</i> <sup>2</sup> hi |
|-------------|---------------------|---------------------|----------------|-----------------------|--------------------------|--------------------------|
| Asia        | Yes                 | 2.74                | 0.25           | 27                    | 0                        | 100                      |
|             | No                  |                     |                |                       |                          |                          |
| Year (2019) | Yes ( $\geq 2019$ ) | 1.82                | 0.40           | 0                     | 0                        | 100                      |
|             | No ( $< 2019$ )     |                     |                |                       |                          |                          |
| Preterm     | Yes                 | 0.31                | 0.86           | 0                     | 0                        | 100                      |
|             | No                  |                     |                |                       |                          |                          |
| Prospective | Yes                 | 5.28                | 0.07           | 62                    | 15                       | 100                      |
|             | No                  |                     |                |                       |                          |                          |
