# Supplementary material for: Accuracy of the neutrophil-to-lymphocyte ratio for the diagnosis of neonatal sepsis: a systematic review and meta-analysis
Source: PubMed Central journal article supplement — BMJ Open. 2022 Dec 14;12(12):e060391. doi: 10.1136/bmjopen-2021-060391 (PMC9756154; doi:10.1136/bmjopen-2021-060391), 2022-12-14
Supplement: bmjopen-2021-060391supp004.pdf [file bmjopen-2021-060391supp004.pdf]

**Table 3 The results of sensitivity analysis**

| Studies                  | Studies          | Sen(95%CI)      | Spe(95%CI)      | LR <sup>-</sup> (95%CI) | LR <sup>+</sup> (95%CI) | DOR (95%CI) | AUC (95%CI)     | Q      |
|--------------------------|------------------|-----------------|-----------------|-------------------------|-------------------------|-------------|-----------------|--------|
| Overall                  | 14[1-14]         | 0.74[0.61-0.83] | 0.88[0.73-0.95] | 0.30[0.19-0.46]         | 6.3[2.6-15.5]           | 21[7-65]    | 0.87[0.84-0.89] | 140.85 |
| Remove non-Asian         | 11[2-9,12-14]    | 0.75[0.59-0.87] | 0.83[0.68-0.92] | 0.30[0.17-0.52]         | 4.4[2.2-8.9]            | 15[5-42]    | 0.86[0.83-0.89] | 120.59 |
| Remove preterm           | 12[1,3-11,13-14] | 0.74[0.59-0.85] | 0.90[0.72-0.97] | 0.29[0.17-0.48]         | 7.6[2.4-24.0]           | 27[7-107]   | 0.88[0.85-0.90] | 147.40 |
| Remove LOS               | 11[1,4-11,13,14] | 0.73[0.56-0.85] | 0.92[0.72-0.98] | 0.29[0.17-0.51]         | 8.6[2.3-32.8]           | 29[6-145]   | 0.88[0.85-0.90] | 147.96 |
| Remove Prospective study | 11[1,3-8,11-14]  | 0.70[0.56-0.81] | 0.83[0.66-0.92] | 0.36[0.25-0.53]         | 4.1[2.1-8.1]            | 11[5-25]    | 0.82[0.79-0.85] | 133.33 |

**Note:** Sen: sensitivity; Spe: specificity; LR<sup>-</sup>: negative likelihood ratio; LR<sup>+</sup>: positive likelihood ratio; DOR: diagnostic odds ratio; AUC: area under the curve;

## Reference

[1] Ruslie R H, Tjipta D G, Samosir C T, et al. Bacterial pattern, and role of laboratory parameters as marker for neonatal sepsis[C]//IOP Conference Series: Earth and Environmental Science. *IOP Publishing*, 2018, 125(1): 012057.

[2] Alkan Ozdemir S ,S, Arun Ozer E , Ilhan O , et al. Can neutrophil to lymphocyte ratio predict late-onset sepsis in preterm infants?[infants? [J]. *Journal of Clinical Laboratory Analysis*, 2017:e22338.

[3] Goldberg O, Amitai N, Chodick G, et al. Can we improve early identification of neonatal late-onset sepsis? A validated prediction model[J]. *Journal of Perinatology*, 2020, 40(9): p. 1315-1322.

- [4] Wilar R. Diagnostic value of eosinopenia and neutrophil to lymphocyte ratio on early onset neonatal sepsis[J]. *Korean Journal of Pediatrics*, 2018, 62(6): p. 217-223.
- [5] Sumitro K R , Utomo M T , Widodo A . Neutrophil-to-Lymphocyte Ratio as an Alternative Marker of Neonatal Sepsis in Developing Countries[J]. *Oman Medical Journal*, 2021, 36(1):e214-e214.
- [6] Du xiaoyu,Ai liang. Changes and clinical significance of NLR, CRP and PCT in neonates with sepsis. *Experimental and Laboratory Medicine*,2019.37(01): p.110-112.
- [7] Zhang, S.J.Platelet-to-Lymphocyte and Neutrophil-to-Lymphocyte Ratio as Predictive Biomarkers for Early-onset Neonatal Sepsis. *Jcsp-Journal of the College of Physicians and Surgeons Pakistan*, 2021. 31(7): p. 821-824.
- [8] Panda S K, Nayak M K, Rath S, et al. The Utility of the Neutrophil-Lymphocyte Ratio as an Early Diagnostic Marker in Neonatal Sepsis[J]. *Cureus*, 2021, 13(1): e12891.
- [9] E.C, H.S,C.C,et al.The Value of Neutrophil to Lymphocyte Ratio and Platelet to Lymphocyte Ratio for Detecting Early-onset Neonatal Sepsis. *Journal of pediatric hematology/oncology*, 2018. 40(4) E229-E232.

- [10] Mahmoud N M S A, Baheeg G, Abdelhakeem M, et al. Platelet to Lymphocyte Ratio and Neutrophil to Lymphocyte Ratio as New Diagnostic Markers for Detection of Early-onset Neonatal Sepsis in Full-term Newborns. 2019.
- [11] Mira S M, Alkhalegy H A, Abd-Elraheem S I, et al. Neutrophil and Platelet to Lymphocyte Ratio for Detecting Early-onset Neonatal Sepsis[J]. *International Journal of Medical Arts*, 2021, 3(2): 1274-1281.
- [12] Varal I, Dogan P. Can neutrophil-lymphocyte ratio be a predictor of late-onset sepsis in preterm infants? [J]. *Annals of Medical Research*, 2020, 27(1):23.
- [13] Lim, H. Sukmawati. M, Artana. W. D, et al. Validity of neutrophil lymphocyte count ratio in neonatal sepsis. *International Journal of Health Sciences*, (2021).5(2), 53-61.
- [14] Kurt A, Tosun MS, Altuntaş N: Diagnostic accuracy of complete blood cell count and neutrophil-to-lymphocyte, lymphocyte-to-monocyte, and platelet-to-lymphocyte ratios for neonatal infection. *Asian Biomedicine* 2022, 16(1):43-52.
