# Supplementary material for: Accuracy of the neutrophil-to-lymphocyte ratio for the diagnosis of neonatal sepsis: a systematic review and meta-analysis
Source: PubMed Central journal article supplement — BMJ Open. 2022 Dec 14;12(12):e060391. doi: 10.1136/bmjopen-2021-060391 (PMC9756154; doi:10.1136/bmjopen-2021-060391), 2022-12-14
Supplement: bmjopen-2021-060391supp005.pdf [file bmjopen-2021-060391supp005.pdf]

**Table 4 Subgroup analysis of neutrophil-to-lymphocyte ratio in the diagnosis of neonatal sepsis.**

| Subgroup        | Study number      | Sen  | Spe  | LR <sup>+</sup> | LR <sup>-</sup> | DOR   | AUC  |
|-----------------|-------------------|------|------|-----------------|-----------------|-------|------|
| All             | 14 [1-14]         | 0.74 | 0.88 | 6.35            | 0.30            | 21.27 | 0.87 |
| <b>Neonates</b> |                   |      |      |                 |                 |       |      |
| EOS             | 6 [4,7,9-11,14]   | 0.75 | 0.99 | 63.30           | 0.26            | 247   | 0.97 |
| LOS             | 4 [2,3,12,14]     | 0.60 | 0.85 | 3.71            | 0.41            | 11.14 | 0.85 |
| <b>Areas</b>    |                   |      |      |                 |                 |       |      |
| Asian           | 11 [2-9,12-14]    | 0.75 | 0.83 | 4.40            | 0.30            | 15    | 0.86 |
| Non-Asian       | 3 [1,10,11]       | 0.67 | 0.90 | 18.64           | 0.38            | 45.94 | 0.95 |
| <b>Cut off</b>  |                   |      |      |                 |                 |       |      |
| 0-2             | 8 [2-4,6,8,10-12] | 0.74 | 0.90 | 7.1             | 0.29            | 25    | 0.77 |
| 2-4             | 3 [5,7,13]        | 0.79 | 0.62 | 2.21            | 0.33            | 6.73  | 0.85 |
| >4              | 3 [1,9,14]        | 0.60 | 0.91 | 9.00            | 0.27            | 31.51 | 0.95 |

**Note:** SEN: sensitivity; SPE: specificity; LR<sup>-</sup>: negative likelihood ratio; LR<sup>+</sup>: positive likelihood ratio; DOR: diagnostic odds ratio; AUC: area under the curve;

#### Reference

- [1] Ruslie R H, Tjipta D G, Samosir C T, et al. Bacterial pattern, and role of laboratory parameters as marker for neonatal sepsis[C]//IOP Conference Series: Earth and Environmental Science. *IOP Publishing*, 2018, 125(1): 012057.
- [2] Alkan Ozdemir S ,S, Arun Ozer E , Ilhan O , et al. Can neutrophil to lymphocyte ratio predict late-onset sepsis in preterm infants?[infants? [J]. *Journal of Clinical Laboratory Analysis*, 2017:e22338.
- [3] Goldberg O, Amitai N, Chodick G, et al. Can we improve early identification of neonatal late-onset sepsis? A validated prediction model[J]. *Journal of Perinatology*, 2020, 40(9): p. 1315-1322.
- [4] Wilar R. Diagnostic value of eosinopenia and neutrophil to lymphocyte ratio on early onset neonatal sepsis[J]. *Korean Journal of Pediatrics*, 2018, 62(6): p. 217-223.

- [5] Sumitro K R , Utomo M T , Widodo A . Neutrophil-to-Lymphocyte Ratio as an Alternative Marker of Neonatal Sepsis in Developing Countries[J]. *Oman Medical Journal*, 2021, 36(1):e214-e214.
- [6] Du xiaoyu,Ai liang. Changes and clinical significance of NLR, CRP and PCT in neonates with sepsis. *Experimental and Laboratory Medicine*,2019.37(01): p.110-112.
- [7] Zhang, S.J.Platelet-to-Lymphocyte and Neutrophil-to-Lymphocyte Ratio as Predictive Biomarkers for Early-onset Neonatal Sepsis. *Jcsp-Journal of the College of Physicians and Surgeons Pakistan*, 2021. 31(7): p. 821-824.
- [8] Panda S K, Nayak M K, Rath S, et al. The Utility of the Neutrophil-Lymphocyte Ratio as an Early Diagnostic Marker in Neonatal Sepsis[J]. *Cureus*, 2021, 13(1): e12891.
- [9] E.C, H.S,C.C,et al.The Value of Neutrophil to Lymphocyte Ratio and Platelet to Lymphocyte Ratio for Detecting Early-onset Neonatal Sepsis. *Journal of pediatric hematology/oncology*, 2018. 40(4) E229-E232.
- [10] Mahmoud N M S A, Baheeg G, Abdelhakeem M, et al.Platelet to Lymphocyte Ratio and Neutrophil to Lymphocyte Ratio as New Diagnostic Markers for Detection of Early-onset Neonatal Sepsis in Full-term Newborns. 2019.
- [11] Mira S M, Alkhalegy H A, Abd-Elraheem S I, et al. Neutrophil and Platelet to Lymphocyte Ratio for Detecting Early-onset Neonatal Sepsis[J]. *International Journal of Medical Arts*, 2021, 3(2): 1274-1281.
- [12] Varal I,Dogan P. Can neutrophil-lymphocyte ratio be a predictor of late-onset sepsis in preterm infants? [J]. *Annals of Medical Research*, 2020, 27(1):23.

[13] Lim, H.Sukmawati.M, Artana.W. D,et al.Validity of neutrophil lymphocyte count ratio in neonatal sepsis. *International Journal of Health Sciences*, (2021).5(2), 53-61.

[14] Kurt A, Tosun MS, Altuntaş N: Diagnostic accuracy of complete blood cell count and neutrophil-to-lymphocyte, lymphocyte-to-monocyte, and platelet-to-lymphocyte ratios for neonatal infection. *Asian Biomedicine* 2022, 16(1):43-52.
